# Supplementary material
Source: publisher figshare collection journal article supplement (https://gsajournals.figshare.com/ndownloader/files/12955040)
Supplement: Supplementary file 1 [file 12955040]

Table S2: Results of GWAS of parathion resistance.
Name_ID	Allele_1_clear	Allele_2_clear	Allele_1_wolbachia	Allele_2_wolbachia	p.value_SNP	padj_SNP	SNP_version6	Gene_name	Consequence	log10_P	Candidate gene
X3R_9069054_SNP	60	22	64	29	1,25E-41	2,24E-35	3R:13243332	Ace	missense_variant	40,9019907	Ace
X3R_9069408_SNP	60	24	65	27	4,07E-39	3,63E-33	3R:13243686	Ace	missense_variant	38,39054156	Ace
X3R_9069248_SNP	56	21	61	33	8,41E-23	5,00E-17	3R:13243526	Ace	intron_variant	22,07517147	Ace
X3R_9069721_SNP	29	53	40	51	3,74E-19	1,67E-13	3R:13243999	Ace	missense_variant	18,4268592	Ace
X3R_9114081_SNP	49	31	52	44	1,90E-18	6,77E-13	3R:13288359	CG15887	intron_variant	17,72199197	CG15887
X3R_9114081_SNP	49	31	52	44	1,90E-18	6,77E-13	3R:13288359	CG15888	upstream_gene_variant	17,72199197
X3R_9114081_SNP	49	31	52	44	1,90E-18	6,77E-13	3R:13288359	CG8630	downstream_gene_variant	17,72199197
X3R_9114081_SNP	49	31	52	44	1,90E-18	6,77E-13	3R:13288359	Osi22	upstream_gene_variant	17,72199197
X3R_9114081_SNP	49	31	52	44	1,90E-18	6,77E-13	3R:13288359	wntD	downstream_gene_variant	17,72199197
X3R_9102472_SNP	48	34	48	45	3,50E-16	1,04E-10	3R:13276750	CG8449	upstream_gene_variant	15,45614072
X3R_9102472_SNP	48	34	48	45	3,50E-16	1,04E-10	3R:13276750	CG8630	upstream_gene_variant	15,45614072
X3R_9078718_SNP	36	47	47	47	5,36E-14	1,37E-08	3R:13252996	Ace	intron_variant	13,27046476	Ace
X3R_9145016_SNP	49	32	42	47	1,14E-13	2,55E-08	3R:13319294	CG45080	upstream_gene_variant	12,94264356
X3R_9145010_SNP	32	49	51	43	2,25E-13	4,46E-08	3R:13319288	CG45080	upstream_gene_variant	12,64764554
X3R_9015116_SNP	55	26	57	37	8,53E-13	1,48E-07	3R:13189394	CG14380	3_prime_UTR_variant	12,06889474	CG14380
X3R_9015116_SNP	55	26	57	37	8,53E-13	1,48E-07	3R:13189394	CG8141	upstream_gene_variant	12,06889474
X3R_9015116_SNP	55	26	57	37	8,53E-13	1,48E-07	3R:13189394	CG8508	upstream_gene_variant	12,06889474
X3R_9013468_SNP	52	32	54	39	9,10E-13	1,48E-07	3R:13187746	CG14380	upstream_gene_variant	12,04084146
X3R_9013468_SNP	52	32	54	39	9,10E-13	1,48E-07	3R:13187746	CG8141	upstream_gene_variant	12,04084146
X3R_9013468_SNP	52	32	54	39	9,10E-13	1,48E-07	3R:13187746	CG8508	upstream_gene_variant	12,04084146
X3R_9017823_SNP	55	26	58	39	9,93E-13	1,48E-07	3R:13192101	CG8141	missense_variant	12,00306199	CG8141
X3R_9017823_SNP	55	26	58	39	9,93E-13	1,48E-07	3R:13192101	CG14380	downstream_gene_variant	12,00306199
X3R_9061359_SNP	44	36	44	51	1,78E-12	2,45E-07	3R:13235637	Ace	intron_variant	11,74904648	Ace
X3R_9087510_SNP	41	44	45	42	3,09E-12	3,94E-07	3R:13261788	Ace	upstream_gene_variant	11,50954848
X3R_9087510_SNP	41	44	45	42	3,09E-12	3,94E-07	3R:13261788	CG11686	intron_variant	11,50954848	CG11686
X3R_9087510_SNP	41	44	45	42	3,09E-12	3,94E-07	3R:13261788	Ravus	downstream_gene_variant	11,50954848
X3R_9087510_SNP	41	44	45	42	3,09E-12	3,94E-07	3R:13261788	Su(var)3-7	upstream_gene_variant	11,50954848
X3R_9017824_SNP	25	54	38	57	7,70E-12	9,16E-07	3R:13192102	CG8141	missense_variant	11,11367056	CG8141
X3R_9017824_SNP	25	54	38	57	7,70E-12	9,16E-07	3R:13192102	CG14380	downstream_gene_variant	11,11367056
X3R_9192972_SNP	28	48	33	55	8,36E-12	9,32E-07	3R:13367250	CheA87a	upstream_gene_variant	11,07782998
X3R_9192972_SNP	28	48	33	55	8,36E-12	9,32E-07	3R:13367250	Dic1	intron_variant	11,07782998	Dic1
X3R_9192972_SNP	28	48	33	55	8,36E-12	9,32E-07	3R:13367250	Dic1	upstream_gene_variant	11,07782998
X3R_9192972_SNP	28	48	33	55	8,36E-12	9,32E-07	3R:13367250	Lip3	downstream_gene_variant	11,07782998
X3R_9192972_SNP	28	48	33	55	8,36E-12	9,32E-07	3R:13367250	poly	upstream_gene_variant	11,07782998
X3R_9069611_SNP	46	31	47	45	9,37E-12	9,83E-07	3R:13243889	Ace	synonymous_variant	11,02823274	Ace
X3R_9078578_SNP	33	44	45	46	9,95E-12	9,86E-07	3R:13252856	Ace	intron_variant	11,00233067	Ace
X3R_9014506_SNP	31	52	38	56	1,06E-11	9,96E-07	3R:13188784	CG14380	synonymous_variant	10,97459418	CG14380
X3R_9014506_SNP	31	52	38	56	1,06E-11	9,96E-07	3R:13188784	CG8141	upstream_gene_variant	10,97459418
X3R_9014506_SNP	31	52	38	56	1,06E-11	9,96E-07	3R:13188784	CG8508	upstream_gene_variant	10,97459418
X3R_9013089_SNP	30	54	39	57	1,23E-11	1,09E-06	3R:13187367	CG14380	upstream_gene_variant	10,91138379
X3R_9013089_SNP	30	54	39	57	1,23E-11	1,09E-06	3R:13187367	CG8141	upstream_gene_variant	10,91138379
X3R_9013089_SNP	30	54	39	57	1,23E-11	1,09E-06	3R:13187367	CG8508	upstream_gene_variant	10,91138379
X3R_9018366_SNP	32	52	38	55	2,41E-11	2,05E-06	3R:13192644	CG14380	downstream_gene_variant	10,61753412
X3R_9018366_SNP	32	52	38	55	2,41E-11	2,05E-06	3R:13192644	CG8141	downstream_gene_variant	10,61753412
X3R_9018365_SNP	32	51	39	56	3,17E-11	2,57E-06	3R:13192643	CG14380	downstream_gene_variant	10,49826024
X3R_9018365_SNP	32	51	39	56	3,17E-11	2,57E-06	3R:13192643	CG8141	downstream_gene_variant	10,49826024
X3R_9102363_SNP	35	42	36	55	5,55E-11	4,30E-06	3R:13276641	CG8449	upstream_gene_variant	10,25587036
X3R_9102363_SNP	35	42	36	55	5,55E-11	4,30E-06	3R:13276641	CG8630	upstream_gene_variant	10,25587036
X3R_9068054_SNP	37	44	32	58	7,81E-11	5,81E-06	3R:13242332	Ace	intron_variant	10,10713421	Ace
X3R_9014198_SNP	32	52	39	56	1,19E-10	8,51E-06	3R:13188476	CG14380	upstream_gene_variant	9,923818484
X3R_9014198_SNP	32	52	39	56	1,19E-10	8,51E-06	3R:13188476	CG8141	upstream_gene_variant	9,923818484
X3R_9014198_SNP	32	52	39	56	1,19E-10	8,51E-06	3R:13188476	CG8508	upstream_gene_variant	9,923818484
X3R_9018353_SNP	33	51	39	54	1,25E-10	8,58E-06	3R:13192631	CG14380	downstream_gene_variant	9,903237325
X3R_9018353_SNP	33	51	39	54	1,25E-10	8,58E-06	3R:13192631	CG8141	downstream_gene_variant	9,903237325
X3R_9132747_SNP	66	21	81	16	1,43E-10	9,46E-06	3R:13307025	CG32473	intron_variant	9,844367043	CG32473
X3R_9132747_SNP	66	21	81	16	1,43E-10	9,46E-06	3R:13307025	CG32473	upstream_gene_variant	9,844367043
X3R_9132747_SNP	66	21	81	16	1,43E-10	9,46E-06	3R:13307025	CG43208	downstream_gene_variant	9,844367043
X3R_9132747_SNP	66	21	81	16	1,43E-10	9,46E-06	3R:13307025	CG8774	downstream_gene_variant	9,844367043
X3R_9071355_SNP	40	39	53	38	1,81E-10	1,15E-05	3R:13245633	Ace	intron_variant	9,743074295	Ace
X3R_9014302_INS	33	48	40	52	1,88E-10	1,16E-05	3R:13188580	CG14380	5_prime_UTR_variant	9,725546792	CG14380
X3R_9014302_INS	33	48	40	52	1,88E-10	1,16E-05	3R:13188580	CG8141	upstream_gene_variant	9,725546792
X3R_9014302_INS	33	48	40	52	1,88E-10	1,16E-05	3R:13188580	CG8508	upstream_gene_variant	9,725546792
X3R_9110674_SNP	46	36	42	46	2,14E-10	1,27E-05	3R:13284952	CG15887	downstream_gene_variant	9,670129841
X3R_9110674_SNP	46	36	42	46	2,14E-10	1,27E-05	3R:13284952	CG15888	3_prime_UTR_variant	9,670129841	CG15888
X3R_9110674_SNP	46	36	42	46	2,14E-10	1,27E-05	3R:13284952	CG8630	downstream_gene_variant	9,670129841
X3R_9018389_SNP	32	51	38	55	3,80E-10	2,19E-05	3R:13192667	CG14380	downstream_gene_variant	9,420455445
X3R_9018389_SNP	32	51	38	55	3,80E-10	2,19E-05	3R:13192667	CG8141	downstream_gene_variant	9,420455445
X3R_9048849_SNP	40	38	45	43	5,31E-10	2,96E-05	3R:13223127	Ace	3_prime_UTR_variant	9,275191504	Ace
X3R_9048849_SNP	40	38	45	43	5,31E-10	2,96E-05	3R:13223127	Ace	downstream_gene_variant	9,275191504
X3R_9048849_SNP	40	38	45	43	5,31E-10	2,96E-05	3R:13223127	CG8476	upstream_gene_variant	9,275191504
X3R_9031928_SNP	42	36	56	35	5,69E-10	3,08E-05	3R:13206206	CG8483	downstream_gene_variant	9,244758762
X3R_9135752_SNP	70	17	81	15	6,74E-10	3,54E-05	3R:13310030	CG32473	intron_variant	9,171450689	CG32473
X3R_9135752_SNP	70	17	81	15	6,74E-10	3,54E-05	3R:13310030	CG44142	downstream_gene_variant	9,171450689
X3R_9147641_SNP	48	36	64	34	7,56E-10	3,85E-05	3R:13321919	CG45080	upstream_gene_variant	9,121716213
X3R_9172280_SNP	31	46	45	47	1,31E-09	6,51E-05	3R:13346558	PK2-R1	downstream_gene_variant	8,881786215
X3R_9192834_SNP	52	31	55	42	2,26E-09	0,00010729	3R:13367112	CheA87a	upstream_gene_variant	8,645339627
X3R_9192834_SNP	52	31	55	42	2,26E-09	0,00010729	3R:13367112	Dic1	intron_variant	8,645339627	Dic1
X3R_9192834_SNP	52	31	55	42	2,26E-09	0,00010729	3R:13367112	Dic1	upstream_gene_variant	8,645339627
X3R_9192834_SNP	52	31	55	42	2,26E-09	0,00010729	3R:13367112	Lip3	downstream_gene_variant	8,645339627
X3R_9192834_SNP	52	31	55	42	2,26E-09	0,00010729	3R:13367112	poly	upstream_gene_variant	8,645339627
X3R_9048516_SNP	37	40	44	47	2,29E-09	0,00010729	3R:13222794	Ace	downstream_gene_variant	8,641107714
X3R_9048516_SNP	37	40	44	47	2,29E-09	0,00010729	3R:13222794	CG8476	upstream_gene_variant	8,641107714
X3R_9173879_SNP	36	46	51	45	2,78E-09	0,000127342	3R:13348157	PK2-R1	downstream_gene_variant	8,555415483
X3R_9031918_SNP	36	42	37	57	4,34E-09	0,000193738	3R:13206196	CG8483	downstream_gene_variant	8,362176572
X3R_9088196_SNP	39	40	46	42	4,46E-09	0,000194086	3R:13262474	Ace	upstream_gene_variant	8,350673516
X3R_9088196_SNP	39	40	46	42	4,46E-09	0,000194086	3R:13262474	CG11686	downstream_gene_variant	8,350673516
X3R_9088196_SNP	39	40	46	42	4,46E-09	0,000194086	3R:13262474	Ravus	downstream_gene_variant	8,350673516
X3R_9088196_SNP	39	40	46	42	4,46E-09	0,000194086	3R:13262474	Su(var)3-7	upstream_gene_variant	8,350673516
X3R_9150871_SNP	48	30	49	44	4,81E-09	0,000204518	3R:13325149	PK2-R2	downstream_gene_variant	8,31747082
X3R_9048808_SNP	39	39	43	48	8,29E-09	0,000343951	3R:13223086	Ace	3_prime_UTR_variant	8,081486281	Ace
X3R_9048808_SNP	39	39	43	48	8,29E-09	0,000343951	3R:13223086	Ace	downstream_gene_variant	8,081486281
X3R_9048808_SNP	39	39	43	48	8,29E-09	0,000343951	3R:13223086	CG8476	upstream_gene_variant	8,081486281
X3R_9131982_SNP	53	20	66	16	9,84E-09	0,000399034	3R:13306260	CG32473	intron_variant	8,006988704	CG32473
X3R_9131982_SNP	53	20	66	16	9,84E-09	0,000399034	3R:13306260	CG32473	upstream_gene_variant	8,006988704
X3R_9131982_SNP	53	20	66	16	9,84E-09	0,000399034	3R:13306260	CG43208	downstream_gene_variant	8,006988704
X3R_9131982_SNP	53	20	66	16	9,84E-09	0,000399034	3R:13306260	CG8774	downstream_gene_variant	8,006988704
X3R_9128977_SNP	51	29	65	31	1,10E-08	0,000436468	3R:13303255	CG32473	intron_variant	7,958286056	CG32473
X3R_9128977_SNP	51	29	65	31	1,10E-08	0,000436468	3R:13303255	CG32473	upstream_gene_variant	7,958286056
X3R_9128977_SNP	51	29	65	31	1,10E-08	0,000436468	3R:13303255	CG43208	upstream_gene_variant	7,958286056
X3R_9128977_SNP	51	29	65	31	1,10E-08	0,000436468	3R:13303255	CG8773	downstream_gene_variant	7,958286056
X3R_9128977_SNP	51	29	65	31	1,10E-08	0,000436468	3R:13303255	CG8774	downstream_gene_variant	7,958286056
X3R_9126697_SNP	41	40	35	59	1,19E-08	0,000460126	3R:13300975	CG8774	missense_variant	7,925816086	CG8774
X3R_9126697_SNP	41	40	35	59	1,19E-08	0,000460126	3R:13300975	CG32473	upstream_gene_variant	7,925816086
X3R_9126697_SNP	41	40	35	59	1,19E-08	0,000460126	3R:13300975	CG43208	upstream_gene_variant	7,925816086
X3R_9126697_SNP	41	40	35	59	1,19E-08	0,000460126	3R:13300975	CG8773	downstream_gene_variant	7,925816086
X3R_9101511_DEL	38	41	35	55	1,41E-08	0,000533605	3R:13275789	CG8449	upstream_gene_variant	7,852133308
X3R_9101511_DEL	38	41	35	55	1,41E-08	0,000533605	3R:13275789	CG8630	upstream_gene_variant	7,852133308
X3R_9106088_SNP	40	41	49	47	1,61E-08	0,000597398	3R:13280366	CG15888	downstream_gene_variant	7,793946019
X3R_9106088_SNP	40	41	49	47	1,61E-08	0,000597398	3R:13280366	CG8630	intron_variant	7,793946019	CG8630
X3R_9050427_SNP	35	43	37	54	2,09E-08	0,000753122	3R:13224705	Ace	3_prime_UTR_variant	7,680309027	Ace
X3R_9050427_SNP	35	43	37	54	2,09E-08	0,000753122	3R:13224705	Ace	downstream_gene_variant	7,680309027
X3R_9050427_SNP	35	43	37	54	2,09E-08	0,000753122	3R:13224705	Ace	intron_variant	7,680309027	Ace
X3R_9050427_SNP	35	43	37	54	2,09E-08	0,000753122	3R:13224705	CG8476	upstream_gene_variant	7,680309027
X3R_9102488_SNP	47	36	60	32	2,11E-08	0,000753122	3R:13276766	CG8449	upstream_gene_variant	7,675615878
X3R_9102488_SNP	47	36	60	32	2,11E-08	0,000753122	3R:13276766	CG8630	upstream_gene_variant	7,675615878
X3R_9144725_SNP	39	44	37	54	2,48E-08	0,000867093	3R:13319003	CG45080	3_prime_UTR_variant	7,605815107	CG45080
X3R_9272119_SNP	23	63	31	66	2,96E-08	0,001014922	3R:13446397	CG14372	upstream_gene_variant	7,529014898
X3R_9272119_SNP	23	63	31	66	2,96E-08	0,001014922	3R:13446397	CR45679	upstream_gene_variant	7,529014898
X3R_8715326_SNP	30	48	47	45	3,32E-08	0,001118448	3R:12889604	CR33929	downstream_gene_variant	7,478559324
X3R_8715326_SNP	30	48	47	45	3,32E-08	0,001118448	3R:12889604	CR44235	downstream_gene_variant	7,478559324
X3R_8715326_SNP	30	48	47	45	3,32E-08	0,001118448	3R:12889604	d-cup	upstream_gene_variant	7,478559324
X3R_9077339_SNP	50	32	63	33	3,64E-08	0,001201636	3R:13251617	Ace	intron_variant	7,439284522	Ace
X3R_9188833_SNP	37	43	60	36	4,11E-08	0,001333607	3R:13363111	Dic1	upstream_gene_variant	7,386060552
X3R_9188833_SNP	37	43	60	36	4,11E-08	0,001333607	3R:13363111	poly	intron_variant	7,386060552	poly
X3R_9101860_SNP	26	55	25	70	4,25E-08	0,001354932	3R:13276138	CG8449	upstream_gene_variant	7,371345567
X3R_9101860_SNP	26	55	25	70	4,25E-08	0,001354932	3R:13276138	CG8630	upstream_gene_variant	7,371345567
X3R_8700776_SNP	26	54	43	48	4,37E-08	0,001368638	3R:12875054	-	intergenic_variant	7,359287663
X3R_9193668_SNP	47	35	44	49	4,68E-08	0,001430674	3R:13367946	Dic1	synonymous_variant	7,329316825	Dic1
X3R_9193668_SNP	47	35	44	49	4,68E-08	0,001430674	3R:13367946	CG34309	upstream_gene_variant	7,329316825
X3R_9193668_SNP	47	35	44	49	4,68E-08	0,001430674	3R:13367946	CheA87a	upstream_gene_variant	7,329316825
X3R_9193668_SNP	47	35	44	49	4,68E-08	0,001430674	3R:13367946	Lip3	downstream_gene_variant	7,329316825
X3R_9193668_SNP	47	35	44	49	4,68E-08	0,001430674	3R:13367946	poly	upstream_gene_variant	7,329316825
X3R_9193757_SNP	37	46	49	44	4,73E-08	0,001430674	3R:13368035	Dic1	missense_variant	7,325058251	Dic1
X3R_9193757_SNP	37	46	49	44	4,73E-08	0,001430674	3R:13368035	CG34309	upstream_gene_variant	7,325058251
X3R_9193757_SNP	37	46	49	44	4,73E-08	0,001430674	3R:13368035	CheA87a	upstream_gene_variant	7,325058251
X3R_9193757_SNP	37	46	49	44	4,73E-08	0,001430674	3R:13368035	Lip3	downstream_gene_variant	7,325058251
X3R_9193757_SNP	37	46	49	44	4,73E-08	0,001430674	3R:13368035	poly	upstream_gene_variant	7,325058251
X3R_9188801_INS	42	41	36	60	5,25E-08	0,00155994	3R:13363079	Dic1	upstream_gene_variant	7,280191997
X3R_9188801_INS	42	41	36	60	5,25E-08	0,00155994	3R:13363079	poly	intron_variant	7,280191997	poly
X3R_9135713_INS	14	67	13	76	5,41E-08	0,001581855	3R:13309991	CG32473	intron_variant	7,266954644	CG32473
X3R_9135713_INS	14	67	13	76	5,41E-08	0,001581855	3R:13309991	CG44142	downstream_gene_variant	7,266954644
X3R_9135901_SNP	17	65	21	78	5,83E-08	0,001676516	3R:13310179	CG32473	synonymous_variant	7,234651585	CG32473
X3R_9135901_SNP	17	65	21	78	5,83E-08	0,001676516	3R:13310179	CG44142	downstream_gene_variant	7,234651585
X3R_9188878_DEL	40	41	37	60	7,32E-08	0,002047459	3R:13363156	Dic1	upstream_gene_variant	7,135453026
X3R_9188878_DEL	40	41	37	60	7,32E-08	0,002047459	3R:13363156	poly	intron_variant	7,135453026	poly
X3R_9133544_SNP	42	33	52	40	7,34E-08	0,002047459	3R:13307822	CG32473	intron_variant	7,134055919	CG32473
X3R_9133544_SNP	42	33	52	40	7,34E-08	0,002047459	3R:13307822	CG32473	upstream_gene_variant	7,134055919
X3R_9133544_SNP	42	33	52	40	7,34E-08	0,002047459	3R:13307822	CG43208	downstream_gene_variant	7,134055919
X3R_9145885_SNP	18	66	20	77	8,22E-08	0,00223929	3R:13320163	CG45080	upstream_gene_variant	7,08514081
X3R_9035795_SNP	54	26	59	33	8,28E-08	0,00223929	3R:13210073	CG8483	splice_region_variant,synonymous_variant	7,081796714	CG8483
X3R_9132647_SNP	60	23	78	19	8,59E-08	0,002256568	3R:13306925	CG32473	intron_variant	7,066200315	CG32473
X3R_9132647_SNP	60	23	78	19	8,59E-08	0,002256568	3R:13306925	CG32473	upstream_gene_variant	7,066200315
X3R_9132647_SNP	60	23	78	19	8,59E-08	0,002256568	3R:13306925	CG43208	downstream_gene_variant	7,066200315
X3R_9132647_SNP	60	23	78	19	8,59E-08	0,002256568	3R:13306925	CG8774	downstream_gene_variant	7,066200315
X3R_9188796_SNP	41	41	59	36	8,60E-08	0,002256568	3R:13363074	Dic1	upstream_gene_variant	7,065493822
X3R_9188796_SNP	41	41	59	36	8,60E-08	0,002256568	3R:13363074	poly	intron_variant	7,065493822	poly
X3R_9048955_SNP	44	33	56	38	9,61E-08	0,002484718	3R:13223233	Ace	3_prime_UTR_variant	7,017324835	Ace
X3R_9048955_SNP	44	33	56	38	9,61E-08	0,002484718	3R:13223233	Ace	downstream_gene_variant	7,017324835
X3R_9048955_SNP	44	33	56	38	9,61E-08	0,002484718	3R:13223233	CG8476	upstream_gene_variant	7,017324835
X3R_9158872_DEL	67	16	83	13	1,30E-07	0,003289091	3R:13333150	PK2-R2	intron_variant	6,8865741	PK2-R2
X3R_8991896_SNP	37	44	47	46	1,32E-07	0,003289091	3R:13166174	timeout	downstream_gene_variant	6,8805224
X3R_9028964_SNP	51	33	55	40	1,33E-07	0,003289091	3R:13203242	-	intergenic_variant	6,877042685
X3R_9124887_SNP	43	38	44	49	1,38E-07	0,003375372	3R:13299165	CG8774	missense_variant	6,859806636	CG8774
X3R_9124887_SNP	43	38	44	49	1,38E-07	0,003375372	3R:13299165	CG32473	upstream_gene_variant	6,859806636
X3R_9124887_SNP	43	38	44	49	1,38E-07	0,003375372	3R:13299165	CG43208	upstream_gene_variant	6,859806636
X3R_9124887_SNP	43	38	44	49	1,38E-07	0,003375372	3R:13299165	CG8773	downstream_gene_variant	6,859806636
X3R_9124887_SNP	43	38	44	49	1,38E-07	0,003375372	3R:13299165	CG8774	5_prime_UTR_variant	6,859806636	CG8774
X3R_9048956_SNP	46	33	54	37	1,44E-07	0,003474556	3R:13223234	Ace	3_prime_UTR_variant	6,841320046	Ace
X3R_9048956_SNP	46	33	54	37	1,44E-07	0,003474556	3R:13223234	Ace	downstream_gene_variant	6,841320046
X3R_9048956_SNP	46	33	54	37	1,44E-07	0,003474556	3R:13223234	CG8476	upstream_gene_variant	6,841320046
X3R_8986293_SNP	41	41	37	58	1,49E-07	0,003541784	3R:13160571	2mit	upstream_gene_variant	6,827167724
X3R_8986293_SNP	41	41	37	58	1,49E-07	0,003541784	3R:13160571	CR45109	upstream_gene_variant	6,827167724
X3R_8986293_SNP	41	41	37	58	1,49E-07	0,003541784	3R:13160571	timeout	intron_variant	6,827167724	timeout
X3R_9193896_SNP	26	60	37	60	1,51E-07	0,0035527	3R:13368174	CG34309	upstream_gene_variant	6,820078986
X3R_9193896_SNP	26	60	37	60	1,51E-07	0,0035527	3R:13368174	CG9813	downstream_gene_variant	6,820078986
X3R_9193896_SNP	26	60	37	60	1,51E-07	0,0035527	3R:13368174	CheA87a	upstream_gene_variant	6,820078986
X3R_9193896_SNP	26	60	37	60	1,51E-07	0,0035527	3R:13368174	Dic1	intron_variant	6,820078986	Dic1
X3R_9193896_SNP	26	60	37	60	1,51E-07	0,0035527	3R:13368174	Lip3	downstream_gene_variant	6,820078986
X3R_9193896_SNP	26	60	37	60	1,51E-07	0,0035527	3R:13368174	poly	upstream_gene_variant	6,820078986
X3R_9033676_SNP	54	25	60	34	1,70E-07	0,003928478	3R:13207954	CG8483	downstream_gene_variant	6,770736018
X3R_9048572_SNP	42	37	50	38	1,74E-07	0,003969845	3R:13222850	Ace	downstream_gene_variant	6,760582889
X3R_9048572_SNP	42	37	50	38	1,74E-07	0,003969845	3R:13222850	CG8476	upstream_gene_variant	6,760582889
X3R_8654469_SNP	42	40	35	56	1,76E-07	0,003972434	3R:12828747	-	intergenic_variant	6,754767246
X3R_9130494_SNP	43	40	55	37	1,96E-07	0,004346552	3R:13304772	CG32473	5_prime_UTR_variant	6,707406817	CG32473
X3R_9130494_SNP	43	40	55	37	1,96E-07	0,004346552	3R:13304772	CG32473	intron_variant	6,707406817	CG32473
X3R_9130494_SNP	43	40	55	37	1,96E-07	0,004346552	3R:13304772	CG32473	upstream_gene_variant	6,707406817
X3R_9130494_SNP	43	40	55	37	1,96E-07	0,004346552	3R:13304772	CG43208	downstream_gene_variant	6,707406817
X3R_9130494_SNP	43	40	55	37	1,96E-07	0,004346552	3R:13304772	CG8774	downstream_gene_variant	6,707406817
X3R_9133547_SNP	37	40	41	53	1,97E-07	0,004346552	3R:13307825	CG32473	intron_variant	6,70482119	CG32473
X3R_9133547_SNP	37	40	41	53	1,97E-07	0,004346552	3R:13307825	CG32473	upstream_gene_variant	6,70482119
X3R_9133547_SNP	37	40	41	53	1,97E-07	0,004346552	3R:13307825	CG43208	downstream_gene_variant	6,70482119
X3R_9117541_SNP	48	32	48	41	2,00E-07	0,004353302	3R:13291819	CG15887	upstream_gene_variant	6,698818462
X3R_9117541_SNP	48	32	48	41	2,00E-07	0,004353302	3R:13291819	CG8773	upstream_gene_variant	6,698818462
X3R_9117541_SNP	48	32	48	41	2,00E-07	0,004353302	3R:13291819	Osi22	3_prime_UTR_variant	6,698818462	Osi22
X3R_9117541_SNP	48	32	48	41	2,00E-07	0,004353302	3R:13291819	wntD	downstream_gene_variant	6,698818462
X3R_8998765_SNP	49	36	49	45	2,03E-07	0,004366241	3R:13173043	-	intergenic_variant	6,692265273
X3R_8654428_SNP	31	51	51	41	2,28E-07	0,004780608	3R:12828706	-	intergenic_variant	6,641593019
X3R_9077295_SNP	32	51	35	59	2,29E-07	0,004780608	3R:13251573	Ace	intron_variant	6,639635342	Ace
X3R_8895213_SNP	34	49	44	47	2,30E-07	0,004780608	3R:13069491	sim	intron_variant	6,637469461	sim
X3R_8895213_SNP	34	49	44	47	2,30E-07	0,004780608	3R:13069491	sim	upstream_gene_variant	6,637469461
X3R_8994268_SNP	51	29	53	41	2,48E-07	0,005051184	3R:13168546	timeout	downstream_gene_variant	6,605899399
X3R_9168595_SNP	42	39	57	37	2,50E-07	0,005051184	3R:13342873	PK2-R1	intron_variant	6,602233918	PK2-R1
X3R_9130399_SNP	40	46	39	54	2,55E-07	0,005051184	3R:13304677	CG32473	intron_variant	6,594048645	CG32473
X3R_9130399_SNP	40	46	39	54	2,55E-07	0,005051184	3R:13304677	CG32473	upstream_gene_variant	6,594048645
X3R_9130399_SNP	40	46	39	54	2,55E-07	0,005051184	3R:13304677	CG43208	downstream_gene_variant	6,594048645
X3R_9130399_SNP	40	46	39	54	2,55E-07	0,005051184	3R:13304677	CG8774	downstream_gene_variant	6,594048645
X3R_8986215_SNP	24	62	25	71	2,55E-07	0,005051184	3R:13160493	2mit	upstream_gene_variant	6,593815405
X3R_8986215_SNP	24	62	25	71	2,55E-07	0,005051184	3R:13160493	CR45109	upstream_gene_variant	6,593815405
X3R_8986215_SNP	24	62	25	71	2,55E-07	0,005051184	3R:13160493	timeout	intron_variant	6,593815405	timeout
X3R_9102255_SNP	46	31	59	30	2,59E-07	0,005080671	3R:13276533	CG8449	upstream_gene_variant	6,585908664
X3R_9102255_SNP	46	31	59	30	2,59E-07	0,005080671	3R:13276533	CG8630	upstream_gene_variant	6,585908664
X3R_9088023_SNP	26	41	30	54	2,62E-07	0,005080671	3R:13262301	Ace	upstream_gene_variant	6,58174214
X3R_9088023_SNP	26	41	30	54	2,62E-07	0,005080671	3R:13262301	CG11686	downstream_gene_variant	6,58174214
X3R_9088023_SNP	26	41	30	54	2,62E-07	0,005080671	3R:13262301	Ravus	downstream_gene_variant	6,58174214
X3R_9088023_SNP	26	41	30	54	2,62E-07	0,005080671	3R:13262301	Su(var)3-7	upstream_gene_variant	6,58174214
X3R_9188851_SNP	42	38	37	60	2,74E-07	0,005248409	3R:13363129	Dic1	upstream_gene_variant	6,56294042
X3R_9188851_SNP	42	38	37	60	2,74E-07	0,005248409	3R:13363129	poly	intron_variant	6,56294042	poly
X3R_9014266_SNP	41	43	64	32	2,80E-07	0,005311369	3R:13188544	CG14380	5_prime_UTR_variant	6,553116747	CG14380
X3R_9014266_SNP	41	43	64	32	2,80E-07	0,005311369	3R:13188544	CG8141	upstream_gene_variant	6,553116747
X3R_9014266_SNP	41	43	64	32	2,80E-07	0,005311369	3R:13188544	CG8508	upstream_gene_variant	6,553116747
X3R_8654432_SNP	31	51	54	41	2,89E-07	0,005425473	3R:12828710	-	intergenic_variant	6,539289891
X3R_9133551_SNP	42	37	53	41	2,96E-07	0,005509378	3R:13307829	CG32473	intron_variant	6,52807726	CG32473
X3R_9133551_SNP	42	37	53	41	2,96E-07	0,005509378	3R:13307829	CG32473	upstream_gene_variant	6,52807726
X3R_9133551_SNP	42	37	53	41	2,96E-07	0,005509378	3R:13307829	CG43208	downstream_gene_variant	6,52807726
X3R_9053729_SNP	47	35	65	28	3,12E-07	0,005725874	3R:13228007	Ace	3_prime_UTR_variant	6,506303048	Ace
X3R_9053729_SNP	47	35	65	28	3,12E-07	0,005725874	3R:13228007	Ace	downstream_gene_variant	6,506303048
X3R_9053729_SNP	47	35	65	28	3,12E-07	0,005725874	3R:13228007	Ace	intron_variant	6,506303048	Ace
X3R_9014414_SNP	45	35	36	56	3,14E-07	0,005725874	3R:13188692	CG14380	intron_variant	6,502383217	CG14380
X3R_9014414_SNP	45	35	36	56	3,14E-07	0,005725874	3R:13188692	CG8141	upstream_gene_variant	6,502383217
X3R_9014414_SNP	45	35	36	56	3,14E-07	0,005725874	3R:13188692	CG8508	upstream_gene_variant	6,502383217
X3R_9048664_SNP	45	35	58	38	3,43E-07	0,006176907	3R:13222942	Ace	downstream_gene_variant	6,465044838
X3R_9048664_SNP	45	35	58	38	3,43E-07	0,006176907	3R:13222942	CG8476	upstream_gene_variant	6,465044838
X_21787264_MNP	8	17	8	28	3,75E-07	0,00662616	X:22385431	-	intergenic_variant	6,426044364
X3R_9071406_SNP	32	46	36	56	3,75E-07	0,00662616	3R:13245684	Ace	intron_variant	6,425867756	Ace
X3R_8657838_SNP	37	47	30	66	3,86E-07	0,006749956	3R:12832116	-	intergenic_variant	6,413549981
X3R_9441165_SNP	10	75	19	80	4,02E-07	0,006904849	3R:13615443	CG9269	upstream_gene_variant	6,395667223
X3R_9441165_SNP	10	75	19	80	4,02E-07	0,006904849	3R:13615443	CG9757	upstream_gene_variant	6,395667223
X3R_9441165_SNP	10	75	19	80	4,02E-07	0,006904849	3R:13615443	CR45680	downstream_gene_variant	6,395667223
X3R_9037928_SNP	74	10	76	16	4,02E-07	0,006904849	3R:13212206	CG8483	intron_variant	6,395263573	CG8483
X3R_9195529_SNP	47	37	42	54	4,11E-07	0,006991416	3R:13369807	CheA87a	missense_variant	6,385696655	CheA87a
X3R_9195529_SNP	47	37	42	54	4,11E-07	0,006991416	3R:13369807	CG34309	upstream_gene_variant	6,385696655
X3R_9195529_SNP	47	37	42	54	4,11E-07	0,006991416	3R:13369807	CG9813	downstream_gene_variant	6,385696655
X3R_9195529_SNP	47	37	42	54	4,11E-07	0,006991416	3R:13369807	Dic1	downstream_gene_variant	6,385696655
X3R_9195529_SNP	47	37	42	54	4,11E-07	0,006991416	3R:13369807	Lip3	downstream_gene_variant	6,385696655
X3R_9195529_SNP	47	37	42	54	4,11E-07	0,006991416	3R:13369807	poly	upstream_gene_variant	6,385696655
X3R_9132513_INS	59	24	72	19	4,38E-07	0,007364612	3R:13306791	CG32473	intron_variant	6,35899534	CG32473
X3R_9132513_INS	59	24	72	19	4,38E-07	0,007364612	3R:13306791	CG32473	upstream_gene_variant	6,35899534
X3R_9132513_INS	59	24	72	19	4,38E-07	0,007364612	3R:13306791	CG43208	downstream_gene_variant	6,35899534
X3R_9132513_INS	59	24	72	19	4,38E-07	0,007364612	3R:13306791	CG8774	downstream_gene_variant	6,35899534
X_21787269_SNP	17	8	27	8	4,67E-07	0,007761294	X:22385436	-	intergenic_variant	6,330458869
X3R_9114055_SNP	50	34	65	31	4,70E-07	0,007761294	3R:13288333	CG15887	intron_variant	6,328093181	CG15887
X3R_9114055_SNP	50	34	65	31	4,70E-07	0,007761294	3R:13288333	CG15888	upstream_gene_variant	6,328093181
X3R_9114055_SNP	50	34	65	31	4,70E-07	0,007761294	3R:13288333	CG8630	downstream_gene_variant	6,328093181
X3R_9114055_SNP	50	34	65	31	4,70E-07	0,007761294	3R:13288333	Osi22	upstream_gene_variant	6,328093181
X3R_9114055_SNP	50	34	65	31	4,70E-07	0,007761294	3R:13288333	wntD	downstream_gene_variant	6,328093181
X3R_9078765_SNP	50	29	69	22	5,07E-07	0,008296368	3R:13253043	Ace	intron_variant	6,295136573	Ace
X3R_9048628_SNP	20	64	34	61	5,12E-07	0,008307323	3R:13222906	Ace	downstream_gene_variant	6,290597311
X3R_9048628_SNP	20	64	34	61	5,12E-07	0,008307323	3R:13222906	CG8476	upstream_gene_variant	6,290597311
X3R_9087669_SNP	50	26	62	22	5,29E-07	0,008443089	3R:13261947	Ace	upstream_gene_variant	6,276917456
X3R_9087669_SNP	50	26	62	22	5,29E-07	0,008443089	3R:13261947	CG11686	intron_variant	6,276917456	CG11686
X3R_9087669_SNP	50	26	62	22	5,29E-07	0,008443089	3R:13261947	Ravus	downstream_gene_variant	6,276917456
X3R_9087669_SNP	50	26	62	22	5,29E-07	0,008443089	3R:13261947	Su(var)3-7	upstream_gene_variant	6,276917456
X3R_8684270_SNP	45	33	28	59	5,30E-07	0,008443089	3R:12858548	CG10126	intron_variant	6,275731669	CG10126
X3R_8684270_SNP	45	33	28	59	5,30E-07	0,008443089	3R:12858548	CG10126	upstream_gene_variant	6,275731669
X3R_9050726_SNP	38	35	49	36	5,95E-07	0,009333031	3R:13225004	Ace	3_prime_UTR_variant	6,225225745	Ace
X3R_9050726_SNP	38	35	49	36	5,95E-07	0,009333031	3R:13225004	Ace	downstream_gene_variant	6,225225745
X3R_9050726_SNP	38	35	49	36	5,95E-07	0,009333031	3R:13225004	Ace	intron_variant	6,225225745	Ace
X3R_9050726_SNP	38	35	49	36	5,95E-07	0,009333031	3R:13225004	CG8476	upstream_gene_variant	6,225225745
X3R_9156793_SNP	42	33	64	35	5,96E-07	0,009333031	3R:13331071	PK2-R2	intron_variant	6,224523538	PK2-R2
X3R_9057661_INS	11	76	13	86	6,05E-07	0,009388026	3R:13231939	Ace	intron_variant	6,218178948	Ace
X3R_9442267_SNP	10	76	16	81	6,20E-07	0,00953156	3R:13616545	CG9269	downstream_gene_variant	6,207829086
X3R_9442267_SNP	10	76	16	81	6,20E-07	0,00953156	3R:13616545	CG9757	upstream_gene_variant	6,207829086
X3R_9442267_SNP	10	76	16	81	6,20E-07	0,00953156	3R:13616545	CR45680	downstream_gene_variant	6,207829086
X3R_9193779_SNP	44	40	55	41	6,69E-07	0,0102065	3R:13368057	Dic1	synonymous_variant	6,174388389	Dic1
X3R_9193779_SNP	44	40	55	41	6,69E-07	0,0102065	3R:13368057	CG34309	upstream_gene_variant	6,174388389
X3R_9193779_SNP	44	40	55	41	6,69E-07	0,0102065	3R:13368057	CheA87a	upstream_gene_variant	6,174388389
X3R_9193779_SNP	44	40	55	41	6,69E-07	0,0102065	3R:13368057	Lip3	downstream_gene_variant	6,174388389
X3R_9193779_SNP	44	40	55	41	6,69E-07	0,0102065	3R:13368057	poly	upstream_gene_variant	6,174388389
X3R_8986186_SNP	41	40	36	61	6,83E-07	0,01032128	3R:13160464	2mit	upstream_gene_variant	6,165442544
X3R_8986186_SNP	41	40	36	61	6,83E-07	0,01032128	3R:13160464	CR45109	upstream_gene_variant	6,165442544
X3R_8986186_SNP	41	40	36	61	6,83E-07	0,01032128	3R:13160464	timeout	intron_variant	6,165442544	timeout
X3R_8654567_SNP	48	34	38	57	6,89E-07	0,01032128	3R:12828845	-	intergenic_variant	6,161539682
X3R_9026735_SNP	12	68	20	74	6,94E-07	0,01032128	3R:13201013	-	intergenic_variant	6,158536286
X3R_8671052_SNP	24	45	44	43	7,20E-07	0,010623938	3R:12845330	beat-Va	intron_variant	6,14238018	beat-Va
X3R_8671052_SNP	24	45	44	43	7,20E-07	0,010623938	3R:12845330	CR45587	downstream_gene_variant	6,14238018
X3R_9038276_SNP	72	14	71	26	7,42E-07	0,010846194	3R:13212554	CG8483	intron_variant	6,129813882	CG8483
X3R_9133565_INS	35	40	32	53	8,02E-07	0,011633955	3R:13307843	CG32473	intron_variant	6,095818592	CG32473
X3R_9133565_INS	35	40	32	53	8,02E-07	0,011633955	3R:13307843	CG32473	upstream_gene_variant	6,095818592
X3R_9133565_INS	35	40	32	53	8,02E-07	0,011633955	3R:13307843	CG43208	downstream_gene_variant	6,095818592
X3R_9087531_SNP	51	27	59	22	8,21E-07	0,011741979	3R:13261809	Ace	upstream_gene_variant	6,085418549
X3R_9087531_SNP	51	27	59	22	8,21E-07	0,011741979	3R:13261809	CG11686	intron_variant	6,085418549	CG11686
X3R_9087531_SNP	51	27	59	22	8,21E-07	0,011741979	3R:13261809	Ravus	downstream_gene_variant	6,085418549
X3R_9087531_SNP	51	27	59	22	8,21E-07	0,011741979	3R:13261809	Su(var)3-7	upstream_gene_variant	6,085418549
X3R_8685852_SNP	34	49	52	43	8,23E-07	0,011741979	3R:12860130	CG10126	upstream_gene_variant	6,084799786
X3R_9284325_SNP	67	19	75	24	8,42E-07	0,0119214	3R:13458603	CG14372	intron_variant	6,074753264	CG14372
X3R_9284325_SNP	67	19	75	24	8,42E-07	0,0119214	3R:13458603	CR17025	downstream_gene_variant	6,074753264
X3R_9284325_SNP	67	19	75	24	8,42E-07	0,0119214	3R:13458603	CR17025	intron_variant,non_coding_transcript_variant	6,074753264	CR17025
X3R_9442358_SNP	20	62	28	66	8,68E-07	0,012192295	3R:13616636	CG9269	downstream_gene_variant	6,061561888
X3R_9442358_SNP	20	62	28	66	8,68E-07	0,012192295	3R:13616636	CG9757	upstream_gene_variant	6,061561888
X3R_9442358_SNP	20	62	28	66	8,68E-07	0,012192295	3R:13616636	CR45680	downstream_gene_variant	6,061561888
X3R_8654474_SNP	38	42	59	36	8,85E-07	0,01234118	3R:12828752	-	intergenic_variant	6,05288442
X3R_9330749_SNP	18	67	27	68	8,95E-07	0,012375053	3R:13505027	-	intergenic_variant	6,048314311
X3R_8986185_SNP	39	40	34	60	9,80E-07	0,013446168	3R:13160463	2mit	upstream_gene_variant	6,008909197
X3R_8986185_SNP	39	40	34	60	9,80E-07	0,013446168	3R:13160463	CR45109	upstream_gene_variant	6,008909197
X3R_8986185_SNP	39	40	34	60	9,80E-07	0,013446168	3R:13160463	timeout	intron_variant	6,008909197	timeout
X3R_8986205_SNP	62	23	71	26	1,01E-06	0,013708587	3R:13160483	2mit	upstream_gene_variant	5,997187084
X3R_8986205_SNP	62	23	71	26	1,01E-06	0,013708587	3R:13160483	CR45109	upstream_gene_variant	5,997187084
X3R_8986205_SNP	62	23	71	26	1,01E-06	0,013708587	3R:13160483	timeout	intron_variant	5,997187084	timeout
X3R_9196465_SNP	45	40	61	38	1,13E-06	0,015299392	3R:13370743	CG34309	upstream_gene_variant	5,945966008
X3R_9196465_SNP	45	40	61	38	1,13E-06	0,015299392	3R:13370743	CG9813	downstream_gene_variant	5,945966008
X3R_9196465_SNP	45	40	61	38	1,13E-06	0,015299392	3R:13370743	CheA87a	downstream_gene_variant	5,945966008
X3R_9196465_SNP	45	40	61	38	1,13E-06	0,015299392	3R:13370743	Dic1	downstream_gene_variant	5,945966008
X3R_9196465_SNP	45	40	61	38	1,13E-06	0,015299392	3R:13370743	Lip3	intron_variant	5,945966008	Lip3
X3R_9196465_SNP	45	40	61	38	1,13E-06	0,015299392	3R:13370743	poly	upstream_gene_variant	5,945966008
X3R_8671093_SNP	48	25	46	40	1,14E-06	0,015299392	3R:12845371	beat-Va	intron_variant	5,942925274	beat-Va
X3R_8671093_SNP	48	25	46	40	1,14E-06	0,015299392	3R:12845371	CR45587	downstream_gene_variant	5,942925274
X2R_10840451_SNP	45	39	41	54	1,22E-06	0,016172679	2R:14952946	aPKC	intron_variant	5,912907826	aPKC
X2R_10840451_SNP	45	39	41	54	1,22E-06	0,016172679	2R:14952946	aPKC	upstream_gene_variant	5,912907826
X3R_9182410_SNP	46	33	57	37	1,22E-06	0,016172679	3R:13356688	mthl12	downstream_gene_variant	5,912335332
X3R_9066054_SNP	10	78	9	91	1,24E-06	0,016293112	3R:13240332	Ace	intron_variant	5,905908127	Ace
X3R_9456453_SNP	10	72	16	83	1,27E-06	0,016512693	3R:13630731	CG10841	upstream_gene_variant	5,8969126
X3R_9456453_SNP	10	72	16	83	1,27E-06	0,016512693	3R:13630731	CR45594	downstream_gene_variant	5,8969126
X3R_9456453_SNP	10	72	16	83	1,27E-06	0,016512693	3R:13630731	sqd	downstream_gene_variant	5,8969126
X3R_9166485_SNP	68	16	83	18	1,29E-06	0,01666636	3R:13340763	PK2-R1	synonymous_variant	5,889731248	PK2-R1
X3R_8986217_SNP	41	39	59	36	1,40E-06	0,017924949	3R:13160495	2mit	upstream_gene_variant	5,854978342
X3R_8986217_SNP	41	39	59	36	1,40E-06	0,017924949	3R:13160495	CR45109	upstream_gene_variant	5,854978342
X3R_8986217_SNP	41	39	59	36	1,40E-06	0,017924949	3R:13160495	timeout	intron_variant	5,854978342	timeout
X3R_9135726_SNP	27	53	37	58	1,45E-06	0,018517794	3R:13310004	CG32473	intron_variant	5,837733788	CG32473
X3R_9135726_SNP	27	53	37	58	1,45E-06	0,018517794	3R:13310004	CG44142	downstream_gene_variant	5,837733788
X3R_9181993_SNP	47	32	58	33	1,48E-06	0,018766567	3R:13356271	mthl12	downstream_gene_variant	5,828847135
X3R_9260710_SNP	34	52	43	52	1,56E-06	0,019611388	3R:13434988	CR42756	downstream_gene_variant	5,806654413
X3R_9260710_SNP	34	52	43	52	1,56E-06	0,019611388	3R:13434988	yrt	upstream_gene_variant	5,806654413
X3R_9118624_SNP	44	36	48	47	1,58E-06	0,019732609	3R:13292902	wntD	synonymous_variant	5,800930529	wntD
X3R_9118624_SNP	44	36	48	47	1,58E-06	0,019732609	3R:13292902	CG15887	upstream_gene_variant	5,800930529
X3R_9118624_SNP	44	36	48	47	1,58E-06	0,019732609	3R:13292902	CG8773	upstream_gene_variant	5,800930529
X3R_9118624_SNP	44	36	48	47	1,58E-06	0,019732609	3R:13292902	Osi22	downstream_gene_variant	5,800930529
X3R_8760047_SNP	48	34	49	44	1,70E-06	0,021069439	3R:12934325	beat-Vb	intron_variant	5,769435623	beat-Vb
X3R_8760047_SNP	48	34	49	44	1,70E-06	0,021069439	3R:12934325	CR44236	upstream_gene_variant	5,769435623
X3R_9440915_SNP	9	75	18	81	1,72E-06	0,021215983	3R:13615193	CG9269	upstream_gene_variant	5,763419916
X3R_9440915_SNP	9	75	18	81	1,72E-06	0,021215983	3R:13615193	CG9757	upstream_gene_variant	5,763419916
X3R_9440915_SNP	9	75	18	81	1,72E-06	0,021215983	3R:13615193	CR45680	downstream_gene_variant	5,763419916
X3R_9156767_SNP	45	32	64	34	1,83E-06	0,022352907	3R:13331045	PK2-R2	intron_variant	5,737764212	PK2-R2
X3R_8708822_SNP	46	34	42	53	1,88E-06	0,02286458	3R:12883100	-	intergenic_variant	5,72497051
X3R_13029573_SNP	15	71	14	87	1,90E-06	0,022922703	3R:17203851	Mur89F	upstream_gene_variant	5,720923541
X2L_12877820_SNP	17	64	19	78	1,92E-06	0,02303156	2L:12877820	-	intergenic_variant	5,715941452
X3R_9133317_SNP	39	39	35	49	1,97E-06	0,023487736	3R:13307595	CG32473	intron_variant	5,704518668	CG32473
X3R_9133317_SNP	39	39	35	49	1,97E-06	0,023487736	3R:13307595	CG32473	upstream_gene_variant	5,704518668
X3R_9133317_SNP	39	39	35	49	1,97E-06	0,023487736	3R:13307595	CG43208	downstream_gene_variant	5,704518668
X3R_9030755_SNP	27	51	34	63	2,00E-06	0,023649887	3R:13205033	CG8483	downstream_gene_variant	5,698645057
X3R_8670858_SNP	52	28	52	42	2,09E-06	0,024490589	3R:12845136	beat-Va	intron_variant	5,680608254	beat-Va
X3R_8670858_SNP	52	28	52	42	2,09E-06	0,024490589	3R:12845136	CR45587	downstream_gene_variant	5,680608254
X3R_9260572_SNP	34	50	39	50	2,13E-06	0,024829778	3R:13434850	CR42756	downstream_gene_variant	5,671786806
X3R_9260572_SNP	34	50	39	50	2,13E-06	0,024829778	3R:13434850	yrt	5_prime_UTR_variant	5,671786806	yrt
X_5034578_INS	39	19	31	28	2,17E-06	0,025150821	X:5140545	CG15465	intron_variant	5,663378186	CG15465
X_5034578_INS	39	19	31	28	2,17E-06	0,025150821	X:5140545	rg	intron_variant	5,663378186	rg
X3R_9088403_SNP	77	12	93	9	2,22E-06	0,025573728	3R:13262681	Ace	upstream_gene_variant	5,653325336
X3R_9088403_SNP	77	12	93	9	2,22E-06	0,025573728	3R:13262681	CG11686	downstream_gene_variant	5,653325336
X3R_9088403_SNP	77	12	93	9	2,22E-06	0,025573728	3R:13262681	Ravus	downstream_gene_variant	5,653325336
X3R_9088403_SNP	77	12	93	9	2,22E-06	0,025573728	3R:13262681	Su(var)3-7	upstream_gene_variant	5,653325336
X3R_9158322_SNP	46	24	54	28	2,26E-06	0,025748873	3R:13332600	PK2-R2	5_prime_UTR_variant	5,64574285	PK2-R2
X3R_9158322_SNP	46	24	54	28	2,26E-06	0,025748873	3R:13332600	PK2-R2	intron_variant	5,64574285	PK2-R2
X3R_9163448_SNP	57	28	52	42	2,28E-06	0,025748873	3R:13337726	PK2-R1	upstream_gene_variant	5,641588072
X3R_9163448_SNP	57	28	52	42	2,28E-06	0,025748873	3R:13337726	PK2-R2	upstream_gene_variant	5,641588072
X2R_6998199_SNP	34	34	34	28	2,28E-06	0,025748873	2R:11110694	luna	intron_variant	5,641508166	lu
X2R_6998199_SNP	34	34	34	28	2,28E-06	0,025748873	2R:11110694	luna	upstream_gene_variant	5,641508166
X3R_9146825_DEL	10	77	9	92	2,31E-06	0,025748873	3R:13321103	CG45080	upstream_gene_variant	5,637145405
X3R_9167277_INS	41	31	45	38	2,31E-06	0,025748873	3R:13341555	PK2-R1	intron_variant	5,63657287	PK2-R1
X3R_8708166_SNP	15	71	30	64	2,41E-06	0,026663171	3R:12882444	-	intergenic_variant	5,618713402
X3R_9048962_SNP	31	49	30	62	2,44E-06	0,026897216	3R:13223240	Ace	3_prime_UTR_variant	5,612228732	Ace
X3R_9048962_SNP	31	49	30	62	2,44E-06	0,026897216	3R:13223240	Ace	downstream_gene_variant	5,612228732
X3R_9048962_SNP	31	49	30	62	2,44E-06	0,026897216	3R:13223240	CG8476	upstream_gene_variant	5,612228732
X_21787259_SNP	17	7	31	8	2,48E-06	0,027106821	X:22385426	-	intergenic_variant	5,605517149
X3R_9134258_SNP	40	42	41	55	2,49E-06	0,027106821	3R:13308536	CG32473	5_prime_UTR_variant	5,60352865	CG32473
X3R_9134258_SNP	40	42	41	55	2,49E-06	0,027106821	3R:13308536	CG32473	intron_variant	5,60352865	CG32473
X3R_9134258_SNP	40	42	41	55	2,49E-06	0,027106821	3R:13308536	CG32473	upstream_gene_variant	5,60352865
X3R_9134258_SNP	40	42	41	55	2,49E-06	0,027106821	3R:13308536	CG43208	downstream_gene_variant	5,60352865
X3R_9134258_SNP	40	42	41	55	2,49E-06	0,027106821	3R:13308536	CG44142	downstream_gene_variant	5,60352865
X3R_8994147_SNP	33	50	45	52	2,62E-06	0,028284581	3R:13168425	timeout	downstream_gene_variant	5,582417381
X3R_9111060_SNP	30	45	37	53	2,69E-06	0,028923513	3R:13285338	CG15888	synonymous_variant	5,570091951	CG15888
X3R_9111060_SNP	30	45	37	53	2,69E-06	0,028923513	3R:13285338	CG15887	downstream_gene_variant	5,570091951
X3R_9111060_SNP	30	45	37	53	2,69E-06	0,028923513	3R:13285338	CG8630	downstream_gene_variant	5,570091951
X3R_8994155_SNP	33	50	44	52	2,72E-06	0,029056127	3R:13168433	timeout	downstream_gene_variant	5,565496884
X3R_9078332_SNP	59	22	77	20	2,75E-06	0,029166516	3R:13252610	Ace	intron_variant	5,561257242	Ace
X3R_9131939_SNP	22	49	16	60	2,80E-06	0,029497085	3R:13306217	CG32473	intron_variant	5,553278188	CG32473
X3R_9131939_SNP	22	49	16	60	2,80E-06	0,029497085	3R:13306217	CG32473	upstream_gene_variant	5,553278188
X3R_9131939_SNP	22	49	16	60	2,80E-06	0,029497085	3R:13306217	CG43208	downstream_gene_variant	5,553278188
X3R_9131939_SNP	22	49	16	60	2,80E-06	0,029497085	3R:13306217	CG8774	downstream_gene_variant	5,553278188
X3R_9013246_SNP	40	43	56	35	2,81E-06	0,029497085	3R:13187524	CG14380	upstream_gene_variant	5,551223055
X3R_9013246_SNP	40	43	56	35	2,81E-06	0,029497085	3R:13187524	CG8141	upstream_gene_variant	5,551223055
X3R_9013246_SNP	40	43	56	35	2,81E-06	0,029497085	3R:13187524	CG8508	upstream_gene_variant	5,551223055
X3R_9047624_SNP	60	22	62	34	2,85E-06	0,029690042	3R:13221902	Ace	downstream_gene_variant	5,545844157
X3R_9047624_SNP	60	22	62	34	2,85E-06	0,029690042	3R:13221902	CG8476	upstream_gene_variant	5,545844157
X3R_8707600_SNP	50	32	45	47	2,88E-06	0,029886149	3R:12881878	-	intergenic_variant	5,540452672
X3R_9117556_SNP	54	27	71	22	2,96E-06	0,030451922	3R:13291834	CG15887	upstream_gene_variant	5,5280358
X3R_9117556_SNP	54	27	71	22	2,96E-06	0,030451922	3R:13291834	CG8773	upstream_gene_variant	5,5280358
X3R_9117556_SNP	54	27	71	22	2,96E-06	0,030451922	3R:13291834	Osi22	3_prime_UTR_variant	5,5280358	Osi22
X3R_9117556_SNP	54	27	71	22	2,96E-06	0,030451922	3R:13291834	wntD	downstream_gene_variant	5,5280358
X3R_9163446_SNP	28	57	42	53	2,97E-06	0,030451922	3R:13337724	PK2-R1	upstream_gene_variant	5,527287129
X3R_9163446_SNP	28	57	42	53	2,97E-06	0,030451922	3R:13337724	PK2-R2	upstream_gene_variant	5,527287129
X3R_7916963_SNP	38	46	53	44	3,07E-06	0,031271538	3R:12091241	ATP8B	upstream_gene_variant	5,512205727
X3R_7916963_SNP	38	46	53	44	3,07E-06	0,031271538	3R:12091241	dpr17	upstream_gene_variant	5,512205727
X3R_8655062_SNP	55	29	41	52	3,08E-06	0,031271538	3R:12829340	-	intergenic_variant	5,510789178
X3R_9196475_SNP	44	39	61	38	3,16E-06	0,031537307	3R:13370753	CG34309	upstream_gene_variant	5,500423429
X3R_9196475_SNP	44	39	61	38	3,16E-06	0,031537307	3R:13370753	CG9813	downstream_gene_variant	5,500423429
X3R_9196475_SNP	44	39	61	38	3,16E-06	0,031537307	3R:13370753	CheA87a	downstream_gene_variant	5,500423429
X3R_9196475_SNP	44	39	61	38	3,16E-06	0,031537307	3R:13370753	Dic1	downstream_gene_variant	5,500423429
X3R_9196475_SNP	44	39	61	38	3,16E-06	0,031537307	3R:13370753	Lip3	intron_variant	5,500423429	Lip3
X3R_9196475_SNP	44	39	61	38	3,16E-06	0,031537307	3R:13370753	poly	upstream_gene_variant	5,500423429
X3R_8860921_SNP	67	15	72	25	3,16E-06	0,031537307	3R:13035199	ry	missense_variant	5,500290379	ry
X3R_8860921_SNP	67	15	72	25	3,16E-06	0,031537307	3R:13035199	CG11668	upstream_gene_variant	5,500290379
X3R_8860921_SNP	67	15	72	25	3,16E-06	0,031537307	3R:13035199	CG12360	upstream_gene_variant	5,500290379
X3R_8860921_SNP	67	15	72	25	3,16E-06	0,031537307	3R:13035199	l(3)87Df	downstream_gene_variant	5,500290379
X3R_8860921_SNP	67	15	72	25	3,16E-06	0,031537307	3R:13035199	snk	downstream_gene_variant	5,500290379
X3R_9077051_SNP	23	59	23	74	3,17E-06	0,031537307	3R:13251329	Ace	intron_variant	5,498431254	Ace
X2R_10841942_SNP	30	52	26	67	3,22E-06	0,031537307	2R:14954437	aPKC	intron_variant	5,49231896	aPKC
X2R_10841942_SNP	30	52	26	67	3,22E-06	0,031537307	2R:14954437	aPKC	upstream_gene_variant	5,49231896
X3R_9125345_SNP	42	41	44	52	3,22E-06	0,031537307	3R:13299623	CG8774	splice_region_variant,intron_variant	5,492240304	CG8774
X3R_9125345_SNP	42	41	44	52	3,22E-06	0,031537307	3R:13299623	CG32473	upstream_gene_variant	5,492240304
X3R_9125345_SNP	42	41	44	52	3,22E-06	0,031537307	3R:13299623	CG43208	upstream_gene_variant	5,492240304
X3R_9125345_SNP	42	41	44	52	3,22E-06	0,031537307	3R:13299623	CG8773	downstream_gene_variant	5,492240304
X3R_8666896_SNP	48	32	48	49	3,22E-06	0,031537307	3R:12841174	beat-Va	3_prime_UTR_variant	5,491696712	beat-Va
X3R_8666896_SNP	48	32	48	49	3,22E-06	0,031537307	3R:12841174	beat-Va	downstream_gene_variant	5,491696712
X3R_9197473_SNP	45	36	49	45	3,23E-06	0,031537307	3R:13371751	CG34309	upstream_gene_variant	5,49017539
X3R_9197473_SNP	45	36	49	45	3,23E-06	0,031537307	3R:13371751	CG9813	downstream_gene_variant	5,49017539
X3R_9197473_SNP	45	36	49	45	3,23E-06	0,031537307	3R:13371751	CheA87a	downstream_gene_variant	5,49017539
X3R_9197473_SNP	45	36	49	45	3,23E-06	0,031537307	3R:13371751	Dic1	downstream_gene_variant	5,49017539
X3R_9197473_SNP	45	36	49	45	3,23E-06	0,031537307	3R:13371751	Lip3	5_prime_UTR_variant	5,49017539	Lip3
X3R_9197473_SNP	45	36	49	45	3,23E-06	0,031537307	3R:13371751	poly	upstream_gene_variant	5,49017539
X3R_9139722_SNP	23	41	30	52	3,37E-06	0,032688712	3R:13314000	CG32473	downstream_gene_variant	5,47223545
X3R_9139722_SNP	23	41	30	52	3,37E-06	0,032688712	3R:13314000	CG44142	upstream_gene_variant	5,47223545
X3R_9139722_SNP	23	41	30	52	3,37E-06	0,032688712	3R:13314000	CG45080	downstream_gene_variant	5,47223545
X3R_9120655_SNP	49	31	64	29	3,51E-06	0,033774064	3R:13294933	CG8773	synonymous_variant	5,455216827	CG8773
X3R_9120655_SNP	49	31	64	29	3,51E-06	0,033774064	3R:13294933	CG8774	upstream_gene_variant	5,455216827
X3R_9120655_SNP	49	31	64	29	3,51E-06	0,033774064	3R:13294933	Osi22	downstream_gene_variant	5,455216827
X3R_9120655_SNP	49	31	64	29	3,51E-06	0,033774064	3R:13294933	wntD	upstream_gene_variant	5,455216827
X3R_9113411_SNP	29	50	30	62	3,52E-06	0,033774064	3R:13287689	CG15887	3_prime_UTR_variant	5,453354821	CG15887
X3R_9113411_SNP	29	50	30	62	3,52E-06	0,033774064	3R:13287689	CG15888	upstream_gene_variant	5,453354821
X3R_9113411_SNP	29	50	30	62	3,52E-06	0,033774064	3R:13287689	CG8630	downstream_gene_variant	5,453354821
X3R_9113411_SNP	29	50	30	62	3,52E-06	0,033774064	3R:13287689	Osi22	upstream_gene_variant	5,453354821
X3R_9113411_SNP	29	50	30	62	3,52E-06	0,033774064	3R:13287689	wntD	downstream_gene_variant	5,453354821
X3R_9077439_SNP	38	45	39	54	3,58E-06	0,033904326	3R:13251717	Ace	intron_variant	5,446163923	Ace
X3R_9301075_SNP	18	66	28	60	3,59E-06	0,033904326	3R:13475353	CR45589	upstream_gene_variant	5,445204943
X3R_8707547_DEL	49	34	45	49	3,59E-06	0,033904326	3R:12881825	-	intergenic_variant	5,444734166
X3R_9258737_SNP	44	39	49	46	3,63E-06	0,034045954	3R:13433015	Act87E	downstream_gene_variant	5,440631971
X3R_9258737_SNP	44	39	49	46	3,63E-06	0,034045954	3R:13433015	yrt	intron_variant	5,440631971	yrt
X3R_9077048_SNP	23	58	23	74	3,68E-06	0,034408297	3R:13251326	Ace	intron_variant	5,433754536	Ace
X3R_9109807_SNP	30	52	37	58	3,72E-06	0,03452671	3R:13284085	CG15887	downstream_gene_variant	5,429994657
X3R_9109807_SNP	30	52	37	58	3,72E-06	0,03452671	3R:13284085	CG15888	downstream_gene_variant	5,429994657
X3R_9109807_SNP	30	52	37	58	3,72E-06	0,03452671	3R:13284085	CG8630	3_prime_UTR_variant	5,429994657	CG8630
X3R_8947711_SNP	34	35	42	38	3,75E-06	0,034672564	3R:13121989	2mit	3_prime_UTR_variant	5,42590782	2mit
X3R_8947711_SNP	34	35	42	38	3,75E-06	0,034672564	3R:13121989	2mit	downstream_gene_variant	5,42590782
X3R_8947711_SNP	34	35	42	38	3,75E-06	0,034672564	3R:13121989	timeout	intron_variant	5,42590782	timeout
X3R_9083737_SNP	34	46	40	54	3,81E-06	0,035065326	3R:13258015	Ace	intron_variant	5,418771466	Ace
X3R_9083737_SNP	34	46	40	54	3,81E-06	0,035065326	3R:13258015	CG11686	upstream_gene_variant	5,418771466
X3R_9083737_SNP	34	46	40	54	3,81E-06	0,035065326	3R:13258015	Ravus	downstream_gene_variant	5,418771466
X3R_9272036_SNP	23	60	32	63	3,86E-06	0,035295594	3R:13446314	CG14372	upstream_gene_variant	5,413695979
X3R_9272036_SNP	23	60	32	63	3,86E-06	0,035295594	3R:13446314	CR45679	upstream_gene_variant	5,413695979
X3R_8684199_SNP	15	41	14	65	3,93E-06	0,03562901	3R:12858477	CG10126	intron_variant	5,405467238	CG10126
X3R_8684199_SNP	15	41	14	65	3,93E-06	0,03562901	3R:12858477	CG10126	upstream_gene_variant	5,405467238
X3L_13449558_SNP	68	20	85	14	3,93E-06	0,03562901	3L:13456458	CG10116	missense_variant	5,4051811	CG10116
X3L_13449558_SNP	68	20	85	14	3,93E-06	0,03562901	3L:13456458	CG10738	intron_variant	5,4051811	CG10738
X3L_11135418_SNP	18	70	20	77	4,07E-06	0,036693458	3L:11142318	CG32082	intron_variant	5,390197243	CG32082
X3R_9144663_SNP	33	50	37	58	4,23E-06	0,037898071	3R:13318941	CG45080	downstream_gene_variant	5,373980903
X3R_8707584_SNP	33	47	48	45	4,32E-06	0,038306892	3R:12881862	-	intergenic_variant	5,364614885
X3R_9098077_SNP	43	31	46	45	4,33E-06	0,038306892	3R:13272355	CG8449	upstream_gene_variant	5,363643816
X3R_9098077_SNP	43	31	46	45	4,33E-06	0,038306892	3R:13272355	Su(var)3-7	downstream_gene_variant	5,363643816
X3R_9050533_SNP	28	38	33	50	4,34E-06	0,038306892	3R:13224811	Ace	3_prime_UTR_variant	5,362822795	Ace
X3R_9050533_SNP	28	38	33	50	4,34E-06	0,038306892	3R:13224811	Ace	downstream_gene_variant	5,362822795
X3R_9050533_SNP	28	38	33	50	4,34E-06	0,038306892	3R:13224811	Ace	intron_variant	5,362822795	Ace
X3R_9050533_SNP	28	38	33	50	4,34E-06	0,038306892	3R:13224811	CG8476	upstream_gene_variant	5,362822795
X3R_8700782_DEL	22	52	35	47	4,43E-06	0,038905368	3R:12875060	-	intergenic_variant	5,353945516
X3R_8986387_SNP	18	63	12	75	4,47E-06	0,039039305	3R:13160665	2mit	upstream_gene_variant	5,349989492
X3R_8986387_SNP	18	63	12	75	4,47E-06	0,039039305	3R:13160665	CR45109	upstream_gene_variant	5,349989492
X3R_8986387_SNP	18	63	12	75	4,47E-06	0,039039305	3R:13160665	timeout	intron_variant	5,349989492	timeout
X3L_12602116_SNP	41	27	40	23	4,49E-06	0,039039305	3L:12609016	caup	upstream_gene_variant	5,348195142
X3L_7488900_SNP	27	52	31	63	4,53E-06	0,039273921	3L:7495800	CG8539	downstream_gene_variant	5,343479597
X3L_7488900_SNP	27	52	31	63	4,53E-06	0,039273921	3L:7495800	Cyp316a1	downstream_gene_variant	5,343479597
X3L_7488900_SNP	27	52	31	63	4,53E-06	0,039273921	3L:7495800	Cyp4d8	intron_variant	5,343479597	Cyp4d8
X3R_9059524_SNP	24	58	22	72	4,66E-06	0,039998239	3R:13233802	Ace	intron_variant	5,331811052	Ace
X3R_9176454_SNP	76	12	91	12	4,66E-06	0,039998239	3R:13350732	mthl12	upstream_gene_variant	5,331346879
X3R_9193373_SNP	57	28	55	38	4,71E-06	0,040189479	3R:13367651	CG34309	upstream_gene_variant	5,32719242
X3R_9193373_SNP	57	28	55	38	4,71E-06	0,040189479	3R:13367651	CheA87a	upstream_gene_variant	5,32719242
X3R_9193373_SNP	57	28	55	38	4,71E-06	0,040189479	3R:13367651	Dic1	5_prime_UTR_variant	5,32719242	Dic1
X3R_9193373_SNP	57	28	55	38	4,71E-06	0,040189479	3R:13367651	Dic1	intron_variant	5,32719242	Dic1
X3R_9193373_SNP	57	28	55	38	4,71E-06	0,040189479	3R:13367651	Lip3	downstream_gene_variant	5,32719242
X3R_9193373_SNP	57	28	55	38	4,71E-06	0,040189479	3R:13367651	poly	upstream_gene_variant	5,32719242
X3R_9167338_SNP	50	27	62	36	4,73E-06	0,04021847	3R:13341616	PK2-R1	intron_variant	5,324806242	PK2-R1
X3R_9112163_SNP	53	31	62	35	4,79E-06	0,040543157	3R:13286441	CG15888	synonymous_variant	5,319251061	CG15888
X3R_9112163_SNP	53	31	62	35	4,79E-06	0,040543157	3R:13286441	CG15887	downstream_gene_variant	5,319251061
X3R_9112163_SNP	53	31	62	35	4,79E-06	0,040543157	3R:13286441	CG8630	downstream_gene_variant	5,319251061
X3R_9112163_SNP	53	31	62	35	4,79E-06	0,040543157	3R:13286441	Osi22	upstream_gene_variant	5,319251061
X3R_9186994_SNP	76	12	90	12	4,83E-06	0,040637401	3R:13361272	Dic1	upstream_gene_variant	5,316189293
X3R_9186994_SNP	76	12	90	12	4,83E-06	0,040637401	3R:13361272	poly	downstream_gene_variant	5,316189293
X3R_9095285_SNP	75	11	92	8	5,12E-06	0,042905805	3R:13269563	CG8449	missense_variant	5,290555423	CG8449
X3R_9095285_SNP	75	11	92	8	5,12E-06	0,042905805	3R:13269563	Su(var)3-7	3_prime_UTR_variant	5,290555423	Su(var)3-7
X3R_9095285_SNP	75	11	92	8	5,12E-06	0,042905805	3R:13269563	Su(var)3-7	downstream_gene_variant	5,290555423
X3R_9031423_SNP	56	22	72	24	5,25E-06	0,043515114	3R:13205701	CG8483	downstream_gene_variant	5,279739456
X3R_9110085_DEL	28	48	29	55	5,26E-06	0,043515114	3R:13284363	CG15887	downstream_gene_variant	5,27923757
X3R_9110085_DEL	28	48	29	55	5,26E-06	0,043515114	3R:13284363	CG15888	downstream_gene_variant	5,27923757
X3R_9110085_DEL	28	48	29	55	5,26E-06	0,043515114	3R:13284363	CG8630	3_prime_UTR_variant	5,27923757	CG8630
X_18931096_SNP	49	41	60	40	5,27E-06	0,043515114	X:19037063	-	intergenic_variant	5,278357202
X3R_9339391_SNP	68	17	57	38	5,39E-06	0,044318358	3R:13513669	-	intergenic_variant	5,26840769
X3R_9110801_SNP	49	33	56	40	5,45E-06	0,044400996	3R:13285079	CG15888	missense_variant	5,263995974	CG15888
X3R_9110801_SNP	49	33	56	40	5,45E-06	0,044400996	3R:13285079	CG15887	downstream_gene_variant	5,263995974
X3R_9110801_SNP	49	33	56	40	5,45E-06	0,044400996	3R:13285079	CG8630	downstream_gene_variant	5,263995974
X3R_8707522_SNP	45	38	32	58	5,45E-06	0,044400996	3R:12881800	-	intergenic_variant	5,263614256
X3R_9359527_SNP	31	53	33	62	5,52E-06	0,044789681	3R:13533805	CG42778	upstream_gene_variant	5,257850435
X3R_9113319_SNP	49	34	47	45	5,59E-06	0,045161212	3R:13287597	CG15887	downstream_gene_variant	5,252293221
X3R_9113319_SNP	49	34	47	45	5,59E-06	0,045161212	3R:13287597	CG15888	upstream_gene_variant	5,252293221
X3R_9113319_SNP	49	34	47	45	5,59E-06	0,045161212	3R:13287597	CG8630	downstream_gene_variant	5,252293221
X3R_9113319_SNP	49	34	47	45	5,59E-06	0,045161212	3R:13287597	Osi22	upstream_gene_variant	5,252293221
X3R_9113319_SNP	49	34	47	45	5,59E-06	0,045161212	3R:13287597	wntD	downstream_gene_variant	5,252293221
X3R_9087063_SNP	73	14	89	10	5,70E-06	0,045525482	3R:13261341	Ace	upstream_gene_variant	5,244389306
X3R_9087063_SNP	73	14	89	10	5,70E-06	0,045525482	3R:13261341	CG11686	intron_variant	5,244389306	CG11686
X3R_9087063_SNP	73	14	89	10	5,70E-06	0,045525482	3R:13261341	Ravus	downstream_gene_variant	5,244389306
X3R_9087063_SNP	73	14	89	10	5,70E-06	0,045525482	3R:13261341	Su(var)3-7	upstream_gene_variant	5,244389306
X3R_9105899_SNP	37	40	41	52	5,70E-06	0,045525482	3R:13280177	CG15888	downstream_gene_variant	5,243785309
X3R_9105899_SNP	37	40	41	52	5,70E-06	0,045525482	3R:13280177	CG8630	intron_variant	5,243785309	CG8630
X3R_9154859_SNP	21	65	18	84	5,72E-06	0,045525482	3R:13329137	PK2-R2	3_prime_UTR_variant	5,242948506	PK2-R2
X3R_8668854_SNP	46	34	38	57	5,92E-06	0,04658154	3R:12843132	beat-Va	intron_variant	5,227547144	beat-Va
X_4292675_INS	9	78	14	84	5,93E-06	0,04658154	X:4398642	CR32773	intron_variant,non_coding_transcript_variant	5,227300871	CR32773
X_4292675_INS	9	78	14	84	5,93E-06	0,04658154	X:4398642	CR32773	upstream_gene_variant	5,227300871
X3R_8998707_SNP	32	36	35	46	5,93E-06	0,04658154	3R:13172985	-	intergenic_variant	5,227211384
X3R_9195701_SNP	40	43	53	44	6,05E-06	0,047348036	3R:13369979	CheA87a	synonymous_variant	5,218214262	CheA87a
X3R_9195701_SNP	40	43	53	44	6,05E-06	0,047348036	3R:13369979	CG34309	upstream_gene_variant	5,218214262
X3R_9195701_SNP	40	43	53	44	6,05E-06	0,047348036	3R:13369979	CG9813	downstream_gene_variant	5,218214262
X3R_9195701_SNP	40	43	53	44	6,05E-06	0,047348036	3R:13369979	Dic1	downstream_gene_variant	5,218214262
X3R_9195701_SNP	40	43	53	44	6,05E-06	0,047348036	3R:13369979	Lip3	downstream_gene_variant	5,218214262
X3R_9195701_SNP	40	43	53	44	6,05E-06	0,047348036	3R:13369979	poly	upstream_gene_variant	5,218214262
X3R_14346818_SNP	44	33	54	41	6,11E-06	0,04760248	3R:18521096	fru	intron_variant	5,21363763	fru
X3R_14161421_SNP	31	48	27	70	6,16E-06	0,04760248	3R:18335699	CG15803	intron_variant	5,210308261	CG15803
X3R_9919737_DEL	47	36	46	50	6,16E-06	0,04760248	3R:14094015	CCHa1	intron_variant	5,210209524	CCHa1
X3R_9919737_DEL	47	36	46	50	6,16E-06	0,04760248	3R:14094015	CG9920	downstream_gene_variant	5,210209524
X3R_9919737_DEL	47	36	46	50	6,16E-06	0,04760248	3R:14094015	Npc2b	downstream_gene_variant	5,210209524
X3R_9134806_SNP	28	58	26	69	6,57E-06	0,050356949	3R:13309084	CG32473	intron_variant	5,182473104	CG32473
X3R_9134806_SNP	28	58	26	69	6,57E-06	0,050356949	3R:13309084	CG32473	upstream_gene_variant	5,182473104
X3R_9134806_SNP	28	58	26	69	6,57E-06	0,050356949	3R:13309084	CG44142	downstream_gene_variant	5,182473104
X3R_8684232_SNP	37	45	63	27	6,58E-06	0,050356949	3R:12858510	CG10126	intron_variant	5,182035752	CG10126
X3R_8684232_SNP	37	45	63	27	6,58E-06	0,050356949	3R:12858510	CG10126	upstream_gene_variant	5,182035752
X3L_12660045_SNP	34	43	48	45	6,77E-06	0,051629469	3L:12666945	CR44552	downstream_gene_variant	5,169337565
X3R_9117629_SNP	54	27	74	22	6,87E-06	0,05198512	3R:13291907	CG15887	upstream_gene_variant	5,163041177
X3R_9117629_SNP	54	27	74	22	6,87E-06	0,05198512	3R:13291907	CG8773	upstream_gene_variant	5,163041177
X3R_9117629_SNP	54	27	74	22	6,87E-06	0,05198512	3R:13291907	Osi22	downstream_gene_variant	5,163041177
X3R_9117629_SNP	54	27	74	22	6,87E-06	0,05198512	3R:13291907	wntD	downstream_gene_variant	5,163041177
X3R_8707594_SNP	32	48	47	41	6,88E-06	0,05198512	3R:12881872	-	intergenic_variant	5,162660027
X3R_9132469_SNP	12	73	11	91	6,93E-06	0,05216039	3R:13306747	CG32473	intron_variant	5,159361907	CG32473
X3R_9132469_SNP	12	73	11	91	6,93E-06	0,05216039	3R:13306747	CG32473	upstream_gene_variant	5,159361907
X3R_9132469_SNP	12	73	11	91	6,93E-06	0,05216039	3R:13306747	CG43208	downstream_gene_variant	5,159361907
X3R_9132469_SNP	12	73	11	91	6,93E-06	0,05216039	3R:13306747	CG8774	downstream_gene_variant	5,159361907
X3R_9193347_SNP	28	57	37	56	6,99E-06	0,052398786	3R:13367625	CheA87a	upstream_gene_variant	5,155552897
X3R_9193347_SNP	28	57	37	56	6,99E-06	0,052398786	3R:13367625	Dic1	5_prime_UTR_variant	5,155552897	Dic1
X3R_9193347_SNP	28	57	37	56	6,99E-06	0,052398786	3R:13367625	Dic1	intron_variant	5,155552897	Dic1
X3R_9193347_SNP	28	57	37	56	6,99E-06	0,052398786	3R:13367625	Lip3	downstream_gene_variant	5,155552897
X3R_9193347_SNP	28	57	37	56	6,99E-06	0,052398786	3R:13367625	poly	upstream_gene_variant	5,155552897
X3R_8994127_SNP	50	32	52	45	7,02E-06	0,05242099	3R:13168405	timeout	downstream_gene_variant	5,153547957
X3R_8981426_SNP	29	56	22	73	7,06E-06	0,052517197	3R:13155704	2mit	upstream_gene_variant	5,150938305
X3R_8981426_SNP	29	56	22	73	7,06E-06	0,052517197	3R:13155704	CR45109	upstream_gene_variant	5,150938305
X3R_8981426_SNP	29	56	22	73	7,06E-06	0,052517197	3R:13155704	timeout	intron_variant	5,150938305	timeout
X3R_19073139_SNP	58	25	62	30	7,15E-06	0,052899429	3R:23247417	CG4449	downstream_gene_variant	5,145983058
X3R_19073139_SNP	58	25	62	30	7,15E-06	0,052899429	3R:23247417	CG4467	intron_variant	5,145983058	CG4467
X3R_19073139_SNP	58	25	62	30	7,15E-06	0,052899429	3R:23247417	EloA	upstream_gene_variant	5,145983058
X3R_9443158_DEL	12	69	14	71	7,46E-06	0,054891495	3R:13617436	CG9269	downstream_gene_variant	5,127319218
X3R_9443158_DEL	12	69	14	71	7,46E-06	0,054891495	3R:13617436	CR45680	downstream_gene_variant	5,127319218
X3R_14346825_SNP	33	46	42	54	7,50E-06	0,054891495	3R:18521103	fru	intron_variant	5,125220946	fru
X3R_9192904_SNP	50	27	61	31	7,51E-06	0,054891495	3R:13367182	CheA87a	upstream_gene_variant	5,124445138
X3R_9192904_SNP	50	27	61	31	7,51E-06	0,054891495	3R:13367182	Dic1	intron_variant	5,124445138	Dic1
X3R_9192904_SNP	50	27	61	31	7,51E-06	0,054891495	3R:13367182	Dic1	upstream_gene_variant	5,124445138
X3R_9192904_SNP	50	27	61	31	7,51E-06	0,054891495	3R:13367182	Lip3	downstream_gene_variant	5,124445138
X3R_9192904_SNP	50	27	61	31	7,51E-06	0,054891495	3R:13367182	poly	upstream_gene_variant	5,124445138
X3R_9069659_SNP	61	20	78	20	7,54E-06	0,054891495	3R:13243937	Ace	synonymous_variant	5,122779935	Ace
X3R_9272184_SNP	21	63	31	63	7,60E-06	0,055122649	3R:13446462	CG14372	upstream_gene_variant	5,119185893
X3R_9272184_SNP	21	63	31	63	7,60E-06	0,055122649	3R:13446462	CR45679	upstream_gene_variant	5,119185893
X3R_9147642_SNP	24	56	23	75	7,65E-06	0,05527669	3R:13321920	CG45080	upstream_gene_variant	5,116212099
X3R_8944714_SNP	14	70	19	77	7,68E-06	0,055280261	3R:13118992	2mit	downstream_gene_variant	5,114429317
X3R_8944714_SNP	14	70	19	77	7,68E-06	0,055280261	3R:13118992	timeout	intron_variant	5,114429317	timeout
X3R_8653450_SNP	33	39	62	26	7,74E-06	0,055493582	3R:12827728	-	intergenic_variant	5,111008971
X3R_9104512_SNP	76	11	94	9	7,79E-06	0,055622852	3R:13278790	CG8630	upstream_gene_variant	5,10825782
X3R_20039213_SNP	35	48	47	51	7,94E-06	0,05600685	3R:24213491	CG17786	downstream_gene_variant	5,099914353
X3R_20039213_SNP	35	48	47	51	7,94E-06	0,05600685	3R:24213491	twin	intron_variant	5,099914353	twin
X3R_9151090_SNP	39	39	41	52	7,95E-06	0,05600685	3R:13325368	PK2-R2	downstream_gene_variant	5,099784054
X3R_8707585_SNP	49	33	45	47	7,97E-06	0,05600685	3R:12881863	-	intergenic_variant	5,098475368
X_13716786_SNP	21	70	23	75	7,97E-06	0,05600685	X:13822753	Clic	upstream_gene_variant	5,09837622
X_13716786_SNP	21	70	23	75	7,97E-06	0,05600685	X:13822753	jub	downstream_gene_variant	5,09837622
X_13716786_SNP	21	70	23	75	7,97E-06	0,05600685	X:13822753	Nup93-1	upstream_gene_variant	5,09837622
X3R_7916904_SNP	44	37	42	52	8,02E-06	0,056140779	3R:12091182	ATP8B	upstream_gene_variant	5,095632462
X3R_7916904_SNP	44	37	42	52	8,02E-06	0,056140779	3R:12091182	dpr17	upstream_gene_variant	5,095632462
X3L_7771530_SNP	9	82	5	96	8,22E-06	0,057058137	3L:7778430	CG32369	3_prime_UTR_variant	5,084953126	CG32369
X3L_7771530_SNP	9	82	5	96	8,22E-06	0,057058137	3L:7778430	Clk	upstream_gene_variant	5,084953126
X3R_9113425_SNP	31	49	31	63	8,26E-06	0,057058137	3R:13287703	CG15887	3_prime_UTR_variant	5,082972477	CG15887
X3R_9113425_SNP	31	49	31	63	8,26E-06	0,057058137	3R:13287703	CG15888	upstream_gene_variant	5,082972477
X3R_9113425_SNP	31	49	31	63	8,26E-06	0,057058137	3R:13287703	CG8630	downstream_gene_variant	5,082972477
X3R_9113425_SNP	31	49	31	63	8,26E-06	0,057058137	3R:13287703	Osi22	upstream_gene_variant	5,082972477
X3R_9113425_SNP	31	49	31	63	8,26E-06	0,057058137	3R:13287703	wntD	downstream_gene_variant	5,082972477
X3R_9193210_SNP	31	56	37	56	8,28E-06	0,057058137	3R:13367488	CheA87a	upstream_gene_variant	5,082141684
X3R_9193210_SNP	31	56	37	56	8,28E-06	0,057058137	3R:13367488	Dic1	intron_variant	5,082141684	Dic1
X3R_9193210_SNP	31	56	37	56	8,28E-06	0,057058137	3R:13367488	Dic1	upstream_gene_variant	5,082141684
X3R_9193210_SNP	31	56	37	56	8,28E-06	0,057058137	3R:13367488	Lip3	downstream_gene_variant	5,082141684
X3R_9193210_SNP	31	56	37	56	8,28E-06	0,057058137	3R:13367488	poly	upstream_gene_variant	5,082141684
X3R_7367756_SNP	29	57	32	60	8,28E-06	0,057058137	3R:11542034	dpr4	intron_variant	5,081833731	dpr4
X3R_9135751_SNP	30	49	40	58	8,46E-06	0,058067935	3R:13310029	CG32473	intron_variant	5,07254135	CG32473
X3R_9135751_SNP	30	49	40	58	8,46E-06	0,058067935	3R:13310029	CG44142	downstream_gene_variant	5,07254135
X3R_21127204_SNP	28	57	22	71	8,55E-06	0,058482922	3R:25301482	CG10550	downstream_gene_variant	5,067781509
X3R_21127204_SNP	28	57	22	71	8,55E-06	0,058482922	3R:25301482	CG13659	intron_variant	5,067781509	CG13659
X3R_21127204_SNP	28	57	22	71	8,55E-06	0,058482922	3R:25301482	CG31097	upstream_gene_variant	5,067781509
X3R_21127204_SNP	28	57	22	71	8,55E-06	0,058482922	3R:25301482	CG31288	upstream_gene_variant	5,067781509
X3R_21127204_SNP	28	57	22	71	8,55E-06	0,058482922	3R:25301482	CG31370	upstream_gene_variant	5,067781509
X3R_21127204_SNP	28	57	22	71	8,55E-06	0,058482922	3R:25301482	CG31436	upstream_gene_variant	5,067781509
X3R_8707574_DEL	50	33	44	49	8,61E-06	0,058612417	3R:12881852	-	intergenic_variant	5,065160156
X3R_9144656_SNP	49	31	58	37	9,00E-06	0,061027539	3R:13318934	CG45080	downstream_gene_variant	5,045969478
X3R_9179747_SNP	30	48	31	64	9,07E-06	0,061277143	3R:13354025	mthl12	missense_variant	5,042548646	mthl12
X2R_20253087_SNP	58	29	72	24	9,23E-06	0,061916845	2R:24365564	bs	intron_variant	5,034887284	bs
X2R_20253087_SNP	58	29	72	24	9,23E-06	0,061916845	2R:24365564	CR44811	intron_variant,non_coding_transcript_variant	5,034887284	CR44811
X2R_10811328_SNP	57	28	77	23	9,26E-06	0,061916845	2R:14923823	CG10249	intron_variant	5,033536258	CG10249
X_13716788_SNP	21	70	26	77	9,27E-06	0,061916845	X:13822755	Clic	upstream_gene_variant	5,033130999
X_13716788_SNP	21	70	26	77	9,27E-06	0,061916845	X:13822755	jub	downstream_gene_variant	5,033130999
X_13716788_SNP	21	70	26	77	9,27E-06	0,061916845	X:13822755	Nup93-1	upstream_gene_variant	5,033130999
X3R_9201815_SNP	33	46	35	59	9,34E-06	0,062175371	3R:13376093	CG34309	downstream_gene_variant	5,029697904
X3R_9201815_SNP	33	46	35	59	9,34E-06	0,062175371	3R:13376093	CG8870	upstream_gene_variant	5,029697904
X3R_9201815_SNP	33	46	35	59	9,34E-06	0,062175371	3R:13376093	CG9813	intron_variant	5,029697904	CG9813
X3R_9201815_SNP	33	46	35	59	9,34E-06	0,062175371	3R:13376093	CR44138	upstream_gene_variant	5,029697904
X3R_9201815_SNP	33	46	35	59	9,34E-06	0,062175371	3R:13376093	Lip3	upstream_gene_variant	5,029697904
X3R_9136134_SNP	11	77	9	92	9,39E-06	0,062305997	3R:13310412	CG32473	missense_variant	5,027168954	CG32473
X3R_9136134_SNP	11	77	9	92	9,39E-06	0,062305997	3R:13310412	CG44142	downstream_gene_variant	5,027168954
X3R_9058965_SNP	76	14	86	13	9,92E-06	0,065392224	3R:13233243	Ace	intron_variant	5,003527688	Ace
X3R_9135224_SNP	11	76	9	92	9,93E-06	0,065392224	3R:13309502	CG32473	missense_variant	5,002955681	CG32473
X3R_9135224_SNP	11	76	9	92	9,93E-06	0,065392224	3R:13309502	CG32473	5_prime_UTR_variant	5,002955681	CG32473
X3R_9135224_SNP	11	76	9	92	9,93E-06	0,065392224	3R:13309502	CG32473	intron_variant	5,002955681	CG32473
X3R_9135224_SNP	11	76	9	92	9,93E-06	0,065392224	3R:13309502	CG44142	downstream_gene_variant	5,002955681
X3R_8684380_SNP	34	35	27	53	1,00E-05	0,065623688	3R:12858658	CG10126	intron_variant	4,999821542	CG10126
X3R_8684380_SNP	34	35	27	53	1,00E-05	0,065623688	3R:12858658	CG10126	upstream_gene_variant	4,999821542
X3L_18291682_SNP	45	38	49	46	1,01E-05	0,066169602	3L:18298582	CG13700	downstream_gene_variant	4,994184817
X3L_18291682_SNP	45	38	49	46	1,01E-05	0,066169602	3L:18298582	CG5103	upstream_gene_variant	4,994184817
X3L_18291682_SNP	45	38	49	46	1,01E-05	0,066169602	3L:18298582	CR43306	downstream_gene_variant	4,994184817
X3L_18291682_SNP	45	38	49	46	1,01E-05	0,066169602	3L:18298582	CR45974	upstream_gene_variant	4,994184817
X3L_18291682_SNP	45	38	49	46	1,01E-05	0,066169602	3L:18298582	CR45975	downstream_gene_variant	4,994184817
X3L_18291682_SNP	45	38	49	46	1,01E-05	0,066169602	3L:18298582	grim	downstream_gene_variant	4,994184817
X3R_9048433_SNP	20	63	33	60	1,02E-05	0,066169602	3R:13222711	Ace	downstream_gene_variant	4,992282513
X3R_9048433_SNP	20	63	33	60	1,02E-05	0,066169602	3R:13222711	CG8476	upstream_gene_variant	4,992282513
X3R_8170132_SNP	8	78	12	85	1,02E-05	0,066169602	3R:12344410	CG10038	downstream_gene_variant	4,991459867
X3R_8170132_SNP	8	78	12	85	1,02E-05	0,066169602	3R:12344410	CG44956	downstream_gene_variant	4,991459867
X3R_9187215_SNP	27	57	36	62	1,03E-05	0,066264659	3R:13361493	Dic1	upstream_gene_variant	4,989260034
X3R_9187215_SNP	27	57	36	62	1,03E-05	0,066264659	3R:13361493	poly	downstream_gene_variant	4,989260034
X3R_9168753_SNP	49	33	62	33	1,04E-05	0,066934685	3R:13343031	PK2-R1	intron_variant	4,983320086	PK2-R1
X3R_9441901_SNP	8	71	16	73	1,07E-05	0,06857756	3R:13616179	CG9269	missense_variant	4,971224254	CG9269
X3R_9441901_SNP	8	71	16	73	1,07E-05	0,06857756	3R:13616179	CG9757	upstream_gene_variant	4,971224254
X3R_9441901_SNP	8	71	16	73	1,07E-05	0,06857756	3R:13616179	CR45680	downstream_gene_variant	4,971224254
X3R_9453821_SNP	72	12	79	16	1,07E-05	0,068606752	3R:13628099	CG10841	upstream_gene_variant	4,969480021
X3R_9453821_SNP	72	12	79	16	1,07E-05	0,068606752	3R:13628099	CR45594	downstream_gene_variant	4,969480021
X3R_9189000_SNP	44	41	40	53	1,08E-05	0,068988821	3R:13363278	Dic1	upstream_gene_variant	4,965514327
X3R_9189000_SNP	44	41	40	53	1,08E-05	0,068988821	3R:13363278	poly	intron_variant	4,965514327	poly
X2L_15239903_SNP	50	31	59	37	1,10E-05	0,069995763	2L:15239903	ZnT35C	intron_variant	4,957673008	ZnT35C
X_21787258_SNP	6	18	8	31	1,11E-05	0,070248401	X:22385425	-	intergenic_variant	4,954565527
X3R_9259225_SNP	55	25	67	28	1,12E-05	0,070405314	3R:13433503	yrt	intron_variant	4,952059206	yrt
X3R_9167652_SNP	77	8	90	8	1,13E-05	0,070813508	3R:13341930	PK2-R1	intron_variant	4,946885431	PK2-R1
X3R_8895210_SNP	32	51	33	63	1,13E-05	0,070813508	3R:13069488	sim	intron_variant	4,945210812	sim
X3R_8895210_SNP	32	51	33	63	1,13E-05	0,070813508	3R:13069488	sim	upstream_gene_variant	4,945210812
X3R_9271054_SNP	20	63	33	65	1,14E-05	0,070813508	3R:13445332	CR45679	upstream_gene_variant	4,944968937
X2L_14731611_SNP	43	39	56	39	1,16E-05	0,071984861	2L:14731611	CG31835	upstream_gene_variant	4,934977047
X2L_14731611_SNP	43	39	56	39	1,16E-05	0,071984861	2L:14731611	CG42685	upstream_gene_variant	4,934977047
X2L_14731611_SNP	43	39	56	39	1,16E-05	0,071984861	2L:14731611	CR44857	downstream_gene_variant	4,934977047
X3R_9192808_DEL	30	46	32	51	1,17E-05	0,071984861	3R:13367086	CheA87a	upstream_gene_variant	4,932977898
X3R_9192808_DEL	30	46	32	51	1,17E-05	0,071984861	3R:13367086	Dic1	intron_variant	4,932977898	Dic1
X3R_9192808_DEL	30	46	32	51	1,17E-05	0,071984861	3R:13367086	Dic1	upstream_gene_variant	4,932977898
X3R_9192808_DEL	30	46	32	51	1,17E-05	0,071984861	3R:13367086	Lip3	downstream_gene_variant	4,932977898
X3R_9192808_DEL	30	46	32	51	1,17E-05	0,071984861	3R:13367086	poly	upstream_gene_variant	4,932977898
X3R_9119182_SNP	64	20	78	16	1,17E-05	0,071984861	3R:13293460	CG15887	upstream_gene_variant	4,931971552
X3R_9119182_SNP	64	20	78	16	1,17E-05	0,071984861	3R:13293460	CG8773	upstream_gene_variant	4,931971552
X3R_9119182_SNP	64	20	78	16	1,17E-05	0,071984861	3R:13293460	Osi22	downstream_gene_variant	4,931971552
X3R_9119182_SNP	64	20	78	16	1,17E-05	0,071984861	3R:13293460	wntD	upstream_gene_variant	4,931971552
X2R_20297885_SNP	42	45	52	42	1,17E-05	0,071984861	2R:24410362	CG45068	upstream_gene_variant	4,931811911
X2R_20297885_SNP	42	45	52	42	1,17E-05	0,071984861	2R:24410362	CG45069	upstream_gene_variant	4,931811911
X2R_20297885_SNP	42	45	52	42	1,17E-05	0,071984861	2R:24410362	SerT	intron_variant	4,931811911	SerT
X3R_9135877_SNP	30	50	40	57	1,17E-05	0,072021496	3R:13310155	CG32473	synonymous_variant	4,930095954	CG32473
X3R_9135877_SNP	30	50	40	57	1,17E-05	0,072021496	3R:13310155	CG44142	downstream_gene_variant	4,930095954
X3R_9260819_DEL	37	45	42	50	1,18E-05	0,072313844	3R:13435097	CR42756	downstream_gene_variant	4,926846783
X3R_9260819_DEL	37	45	42	50	1,18E-05	0,072313844	3R:13435097	yrt	upstream_gene_variant	4,926846783
X3R_13030148_SNP	70	16	75	18	1,20E-05	0,073100005	3R:17204426	Mur89F	upstream_gene_variant	4,920666054
X3R_9101509_SNP	32	48	31	64	1,21E-05	0,073519329	3R:13275787	CG8449	upstream_gene_variant	4,915960935
X3R_9101509_SNP	32	48	31	64	1,21E-05	0,073519329	3R:13275787	CG8630	upstream_gene_variant	4,915960935
X3R_9132083_SNP	51	18	64	17	1,22E-05	0,073519329	3R:13306361	CG32473	intron_variant	4,91522753	CG32473
X3R_9132083_SNP	51	18	64	17	1,22E-05	0,073519329	3R:13306361	CG32473	upstream_gene_variant	4,91522753
X3R_9132083_SNP	51	18	64	17	1,22E-05	0,073519329	3R:13306361	CG43208	downstream_gene_variant	4,91522753
X3R_9132083_SNP	51	18	64	17	1,22E-05	0,073519329	3R:13306361	CG8774	downstream_gene_variant	4,91522753
X3R_13030288_SNP	14	52	16	65	1,22E-05	0,073681206	3R:17204566	Mur89F	upstream_gene_variant	4,912802647
X3R_8988821_SNP	39	48	35	57	1,23E-05	0,073689581	3R:13163099	timeout	synonymous_variant	4,911288542	timeout
X3R_9340408_SNP	56	26	55	43	1,25E-05	0,074526732	3R:13514686	-	intergenic_variant	4,904795767
X3R_11760861_SNP	61	25	64	31	1,25E-05	0,074526732	3R:15935139	blp	downstream_gene_variant	4,903467814
X3R_11760861_SNP	61	25	64	31	1,25E-05	0,074526732	3R:15935139	CG4221	downstream_gene_variant	4,903467814
X3R_11760861_SNP	61	25	64	31	1,25E-05	0,074526732	3R:15935139	CG5478	upstream_gene_variant	4,903467814
X3R_11760861_SNP	61	25	64	31	1,25E-05	0,074526732	3R:15935139	Sap47	5_prime_UTR_variant	4,903467814	Sap47
X3R_21110572_SNP	23	60	25	68	1,26E-05	0,074657637	3R:25284850	CG11892	downstream_gene_variant	4,901255585
X3R_21110572_SNP	23	60	25	68	1,26E-05	0,074657637	3R:25284850	CG13658	upstream_gene_variant	4,901255585
X3R_21110572_SNP	23	60	25	68	1,26E-05	0,074657637	3R:25284850	CG31104	upstream_gene_variant	4,901255585
X3R_21110572_SNP	23	60	25	68	1,26E-05	0,074657637	3R:25284850	CG31300	intron_variant	4,901255585	CG31300
X3R_9113409_SNP	31	50	29	62	1,26E-05	0,07492804	3R:13287687	CG15887	3_prime_UTR_variant	4,898240214	CG15887
X3R_9113409_SNP	31	50	29	62	1,26E-05	0,07492804	3R:13287687	CG15888	upstream_gene_variant	4,898240214
X3R_9113409_SNP	31	50	29	62	1,26E-05	0,07492804	3R:13287687	CG8630	downstream_gene_variant	4,898240214
X3R_9113409_SNP	31	50	29	62	1,26E-05	0,07492804	3R:13287687	Osi22	upstream_gene_variant	4,898240214
X3R_9113409_SNP	31	50	29	62	1,26E-05	0,07492804	3R:13287687	wntD	downstream_gene_variant	4,898240214
X3R_9125346_SNP	42	41	42	52	1,32E-05	0,078088524	3R:13299624	CG8774	splice_region_variant,intron_variant	4,878856924	CG8774
X3R_9125346_SNP	42	41	42	52	1,32E-05	0,078088524	3R:13299624	CG32473	upstream_gene_variant	4,878856924
X3R_9125346_SNP	42	41	42	52	1,32E-05	0,078088524	3R:13299624	CG43208	upstream_gene_variant	4,878856924
X3R_9125346_SNP	42	41	42	52	1,32E-05	0,078088524	3R:13299624	CG8773	downstream_gene_variant	4,878856924
X3R_9099033_SNP	28	55	43	52	1,34E-05	0,078700957	3R:13273311	CG8449	upstream_gene_variant	4,874028437
X3R_9099033_SNP	28	55	43	52	1,34E-05	0,078700957	3R:13273311	Su(var)3-7	downstream_gene_variant	4,874028437
X2R_16415187_SNP	83	8	94	9	1,34E-05	0,078921585	2R:20527682	CG30151	downstream_gene_variant	4,8713817
X2R_16415187_SNP	83	8	94	9	1,34E-05	0,078921585	2R:20527682	CR44650	downstream_gene_variant	4,8713817
X2R_16415187_SNP	83	8	94	9	1,34E-05	0,078921585	2R:20527682	CR44651	upstream_gene_variant	4,8713817
X2R_16415187_SNP	83	8	94	9	1,34E-05	0,078921585	2R:20527682	GNBP-like3	downstream_gene_variant	4,8713817
X3R_19073132_SNP	26	58	30	61	1,37E-05	0,079664461	3R:23247410	CG4449	downstream_gene_variant	4,863758689
X3R_19073132_SNP	26	58	30	61	1,37E-05	0,079664461	3R:23247410	CG4467	intron_variant	4,863758689	CG4467
X3R_19073132_SNP	26	58	30	61	1,37E-05	0,079664461	3R:23247410	EloA	upstream_gene_variant	4,863758689
X3R_14346904_SNP	31	51	37	57	1,37E-05	0,079664461	3R:18521182	fru	intron_variant	4,863258828	fru
X2L_2758116_SNP	27	55	19	79	1,37E-05	0,079664461	2L:2758116	Bacc	downstream_gene_variant	4,863048082
X2L_2758116_SNP	27	55	19	79	1,37E-05	0,079664461	2L:2758116	CG9960	downstream_gene_variant	4,863048082
X2L_2758116_SNP	27	55	19	79	1,37E-05	0,079664461	2L:2758116	CR44772	non_coding_transcript_exon_variant	4,863048082	CR44772
X2L_2758116_SNP	27	55	19	79	1,37E-05	0,079664461	2L:2758116	Snapin	downstream_gene_variant	4,863048082
X2L_2758116_SNP	27	55	19	79	1,37E-05	0,079664461	2L:2758116	Trn-SR	upstream_gene_variant	4,863048082
X3R_9165505_SNP	48	33	43	52	1,38E-05	0,080163703	3R:13339783	PK2-R1	intron_variant	4,858922594	PK2-R1
X3R_8668439_SNP	33	50	48	44	1,39E-05	0,080221098	3R:12842717	beat-Va	synonymous_variant	4,856767482	beat-Va
X3R_9260807_SNP	44	39	50	45	1,39E-05	0,080221098	3R:13435085	CR42756	downstream_gene_variant	4,855800786
X3R_9260807_SNP	44	39	50	45	1,39E-05	0,080221098	3R:13435085	yrt	upstream_gene_variant	4,855800786
X3R_9137279_SNP	11	77	9	89	1,42E-05	0,081382734	3R:13311557	CG32473	synonymous_variant	4,848158413	CG32473
X3R_9137279_SNP	11	77	9	89	1,42E-05	0,081382734	3R:13311557	CG44142	downstream_gene_variant	4,848158413
X3R_9165508_SNP	47	34	44	52	1,43E-05	0,0818003	3R:13339786	PK2-R1	intron_variant	4,844541588	PK2-R1
X2R_16415190_SNP	81	8	94	9	1,44E-05	0,082038885	2R:20527685	CG30151	downstream_gene_variant	4,840369953
X2R_16415190_SNP	81	8	94	9	1,44E-05	0,082038885	2R:20527685	CR44650	downstream_gene_variant	4,840369953
X2R_16415190_SNP	81	8	94	9	1,44E-05	0,082038885	2R:20527685	CR44651	upstream_gene_variant	4,840369953
X2R_16415190_SNP	81	8	94	9	1,44E-05	0,082038885	2R:20527685	GNBP-like3	downstream_gene_variant	4,840369953
X3R_9066803_SNP	31	49	35	56	1,45E-05	0,082038885	3R:13241081	Ace	intron_variant	4,839017643	Ace
X2R_20257397_SNP	60	26	74	21	1,45E-05	0,082038885	2R:24369874	bs	intron_variant	4,838795563	bs
X2R_20257397_SNP	60	26	74	21	1,45E-05	0,082038885	2R:24369874	CR44811	upstream_gene_variant	4,838795563
X2R_20257397_SNP	60	26	74	21	1,45E-05	0,082038885	2R:24369874	tRNA:N5:60C	upstream_gene_variant	4,838795563
X3R_9442237_SNP	17	66	24	70	1,45E-05	0,082038885	3R:13616515	CG9269	downstream_gene_variant	4,837542836
X3R_9442237_SNP	17	66	24	70	1,45E-05	0,082038885	3R:13616515	CG9757	upstream_gene_variant	4,837542836
X3R_9442237_SNP	17	66	24	70	1,45E-05	0,082038885	3R:13616515	CR45680	downstream_gene_variant	4,837542836
X3R_9030746_SNP	28	52	33	62	1,46E-05	0,082038885	3R:13205024	CG8483	downstream_gene_variant	4,836239497
X3R_8657929_SNP	27	50	51	44	1,47E-05	0,082038885	3R:12832207	-	intergenic_variant	4,83408412
X3R_9192773_SNP	27	58	28	65	1,47E-05	0,082038885	3R:13367051	CheA87a	upstream_gene_variant	4,833640646
X3R_9192773_SNP	27	58	28	65	1,47E-05	0,082038885	3R:13367051	Dic1	intron_variant	4,833640646	Dic1
X3R_9192773_SNP	27	58	28	65	1,47E-05	0,082038885	3R:13367051	Dic1	upstream_gene_variant	4,833640646
X3R_9192773_SNP	27	58	28	65	1,47E-05	0,082038885	3R:13367051	Lip3	downstream_gene_variant	4,833640646
X3R_9192773_SNP	27	58	28	65	1,47E-05	0,082038885	3R:13367051	poly	upstream_gene_variant	4,833640646
X2R_6077571_SNP	18	72	14	84	1,48E-05	0,082381492	2R:10190066	KCNQ	intron_variant	4,829459311	KCNQ
X3R_9132164_SNP	52	19	66	16	1,49E-05	0,082381492	3R:13306442	CG32473	intron_variant	4,827765558	CG32473
X3R_9132164_SNP	52	19	66	16	1,49E-05	0,082381492	3R:13306442	CG32473	upstream_gene_variant	4,827765558
X3R_9132164_SNP	52	19	66	16	1,49E-05	0,082381492	3R:13306442	CG43208	downstream_gene_variant	4,827765558
X3R_9132164_SNP	52	19	66	16	1,49E-05	0,082381492	3R:13306442	CG8774	downstream_gene_variant	4,827765558
X3R_9132165_SNP	19	52	16	66	1,49E-05	0,082381492	3R:13306443	CG32473	intron_variant	4,827765558	CG32473
X3R_9132165_SNP	19	52	16	66	1,49E-05	0,082381492	3R:13306443	CG32473	upstream_gene_variant	4,827765558
X3R_9132165_SNP	19	52	16	66	1,49E-05	0,082381492	3R:13306443	CG43208	downstream_gene_variant	4,827765558
X3R_9132165_SNP	19	52	16	66	1,49E-05	0,082381492	3R:13306443	CG8774	downstream_gene_variant	4,827765558
X3R_9258803_SNP	55	30	61	36	1,50E-05	0,083087053	3R:13433081	yrt	synonymous_variant	4,822715204	yrt
X3R_9258803_SNP	55	30	61	36	1,50E-05	0,083087053	3R:13433081	Act87E	downstream_gene_variant	4,822715204
X3R_9167839_SNP	35	47	41	55	1,52E-05	0,083840023	3R:13342117	PK2-R1	intron_variant	4,817454679	PK2-R1
X3R_9081297_SNP	77	10	93	9	1,56E-05	0,085249904	3R:13255575	Ace	intron_variant	4,80685842	Ace
X3R_9081297_SNP	77	10	93	9	1,56E-05	0,085249904	3R:13255575	CG11686	upstream_gene_variant	4,80685842
X3R_9045116_SNP	65	16	59	33	1,56E-05	0,085249904	3R:13219394	Ace	downstream_gene_variant	4,806548412
X3R_9045116_SNP	65	16	59	33	1,56E-05	0,085249904	3R:13219394	CG8476	downstream_gene_variant	4,806548412
X3R_9045116_SNP	65	16	59	33	1,56E-05	0,085249904	3R:13219394	CG8483	upstream_gene_variant	4,806548412
X3R_9442222_SNP	12	74	22	77	1,56E-05	0,085249904	3R:13616500	CG9269	downstream_gene_variant	4,806201655
X3R_9442222_SNP	12	74	22	77	1,56E-05	0,085249904	3R:13616500	CG9757	upstream_gene_variant	4,806201655
X3R_9442222_SNP	12	74	22	77	1,56E-05	0,085249904	3R:13616500	CR45680	downstream_gene_variant	4,806201655
X3R_9132475_SNP	20	40	13	50	1,57E-05	0,085249904	3R:13306753	CG32473	intron_variant	4,804883336	CG32473
X3R_9132475_SNP	20	40	13	50	1,57E-05	0,085249904	3R:13306753	CG32473	upstream_gene_variant	4,804883336
X3R_9132475_SNP	20	40	13	50	1,57E-05	0,085249904	3R:13306753	CG43208	downstream_gene_variant	4,804883336
X3R_9132475_SNP	20	40	13	50	1,57E-05	0,085249904	3R:13306753	CG8774	downstream_gene_variant	4,804883336
X3R_8991418_SNP	22	60	22	75	1,58E-05	0,085937134	3R:13165696	timeout	downstream_gene_variant	4,800074319
X3R_9442264_SNP	12	74	20	78	1,60E-05	0,086722602	3R:13616542	CG9269	downstream_gene_variant	4,794804842
X3R_9442264_SNP	12	74	20	78	1,60E-05	0,086722602	3R:13616542	CG9757	upstream_gene_variant	4,794804842
X3R_9442264_SNP	12	74	20	78	1,60E-05	0,086722602	3R:13616542	CR45680	downstream_gene_variant	4,794804842
X2R_10840472_SNP	49	33	45	51	1,61E-05	0,08695404	2R:14952967	aPKC	intron_variant	4,792333324	aPKC
X2R_10840472_SNP	49	33	45	51	1,61E-05	0,08695404	2R:14952967	aPKC	upstream_gene_variant	4,792333324
X3L_13449726_SNP	34	55	35	62	1,64E-05	0,08790847	3L:13456626	CG10116	missense_variant	4,786282275	CG10116
X3L_13449726_SNP	34	55	35	62	1,64E-05	0,08790847	3L:13456626	CG10738	intron_variant	4,786282275	CG10738
X3L_18313811_SNP	60	24	78	14	1,69E-05	0,09029109	3L:18320711	-	intergenic_variant	4,773354219
X2R_9644299_SNP	68	19	86	13	1,69E-05	0,09029109	2R:13756794	CG6280	missense_variant	4,771379726	CG6280
X3L_18291677_DEL	39	45	46	49	1,70E-05	0,09029109	3L:18298577	CG13700	downstream_gene_variant	4,770761379
X3L_18291677_DEL	39	45	46	49	1,70E-05	0,09029109	3L:18298577	CG5103	upstream_gene_variant	4,770761379
X3L_18291677_DEL	39	45	46	49	1,70E-05	0,09029109	3L:18298577	CR43306	downstream_gene_variant	4,770761379
X3L_18291677_DEL	39	45	46	49	1,70E-05	0,09029109	3L:18298577	CR45974	upstream_gene_variant	4,770761379
X3L_18291677_DEL	39	45	46	49	1,70E-05	0,09029109	3L:18298577	CR45975	downstream_gene_variant	4,770761379
X3L_18291677_DEL	39	45	46	49	1,70E-05	0,09029109	3L:18298577	grim	downstream_gene_variant	4,770761379
X3R_25814478_SNP	43	38	53	40	1,72E-05	0,091376205	3R:29988756	CG7896	synonymous_variant	4,764278688	CG7896
X3R_25814478_SNP	43	38	53	40	1,72E-05	0,091376205	3R:29988756	Acph-1	downstream_gene_variant	4,764278688
X3R_25814478_SNP	43	38	53	40	1,72E-05	0,091376205	3R:29988756	CG7903	downstream_gene_variant	4,764278688
X2L_19912030_SNP	33	49	41	52	1,74E-05	0,091933641	2L:19912030	TotF	synonymous_variant	4,760346721	TotF
X2L_19912030_SNP	33	49	41	52	1,74E-05	0,091933641	2L:19912030	CR43097	upstream_gene_variant	4,760346721
X2L_19912030_SNP	33	49	41	52	1,74E-05	0,091933641	2L:19912030	sick	intron_variant	4,760346721	sick
X2L_19912030_SNP	33	49	41	52	1,74E-05	0,091933641	2L:19912030	Victoria	downstream_gene_variant	4,760346721
X3R_9107198_SNP	56	27	65	28	1,76E-05	0,092175982	3R:13281476	CG15888	downstream_gene_variant	4,754986811
X3R_9107198_SNP	56	27	65	28	1,76E-05	0,092175982	3R:13281476	CG8630	intron_variant	4,754986811	CG8630
X3R_8654526_SNP	43	33	39	54	1,76E-05	0,092175982	3R:12828804	-	intergenic_variant	4,754851206
X3R_9150039_SNP	58	24	74	22	1,76E-05	0,092175982	3R:13324317	PK2-R2	downstream_gene_variant	4,753700147
X3R_9452082_SNP	12	74	17	81	1,76E-05	0,092175982	3R:13626360	CR45594	downstream_gene_variant	4,753579471
X3R_9259563_SNP	25	54	31	64	1,77E-05	0,092175982	3R:13433841	CR42756	downstream_gene_variant	4,752807202
X3R_9259563_SNP	25	54	31	64	1,77E-05	0,092175982	3R:13433841	yrt	intron_variant	4,752807202	yrt
X3R_9443387_SNP	12	71	21	74	1,78E-05	0,092565592	3R:13617665	CG9269	downstream_gene_variant	4,749707377
X3R_9443387_SNP	12	71	21	74	1,78E-05	0,092565592	3R:13617665	CR45680	downstream_gene_variant	4,749707377
X3R_19073136_SNP	25	58	30	61	1,79E-05	0,093017201	3R:23247414	CG4449	downstream_gene_variant	4,746329373
X3R_19073136_SNP	25	58	30	61	1,79E-05	0,093017201	3R:23247414	CG4467	intron_variant	4,746329373	CG4467
X3R_19073136_SNP	25	58	30	61	1,79E-05	0,093017201	3R:23247414	EloA	upstream_gene_variant	4,746329373
X2R_6998190_SNP	52	33	60	34	1,82E-05	0,094382096	2R:11110685	luna	intron_variant	4,738742367	lu
X2R_6998190_SNP	52	33	60	34	1,82E-05	0,094382096	2R:11110685	luna	upstream_gene_variant	4,738742367
X2R_20297890_SNP	42	44	54	42	1,87E-05	0,096436968	2R:24410367	CG45068	upstream_gene_variant	4,727391276
X2R_20297890_SNP	42	44	54	42	1,87E-05	0,096436968	2R:24410367	CG45069	upstream_gene_variant	4,727391276
X2R_20297890_SNP	42	44	54	42	1,87E-05	0,096436968	2R:24410367	SerT	intron_variant	4,727391276	SerT
X3R_19073134_SNP	26	57	29	62	1,88E-05	0,096436968	3R:23247412	CG4449	downstream_gene_variant	4,726766703
X3R_19073134_SNP	26	57	29	62	1,88E-05	0,096436968	3R:23247412	CG4467	intron_variant	4,726766703	CG4467
X3R_19073134_SNP	26	57	29	62	1,88E-05	0,096436968	3R:23247412	EloA	upstream_gene_variant	4,726766703
X3R_14985153_DEL	13	64	8	79	1,88E-05	0,096436968	3R:19159431	CG11779	intron_variant	4,72562829	CG11779
X3R_14985153_DEL	13	64	8	79	1,88E-05	0,096436968	3R:19159431	CG11779	upstream_gene_variant	4,72562829
X3R_14985153_DEL	13	64	8	79	1,88E-05	0,096436968	3R:19159431	CG42358	downstream_gene_variant	4,72562829
X3R_14985153_DEL	13	64	8	79	1,88E-05	0,096436968	3R:19159431	CG42359	downstream_gene_variant	4,72562829
X3R_14985153_DEL	13	64	8	79	1,88E-05	0,096436968	3R:19159431	nos	3_prime_UTR_variant	4,72562829	nos
X3R_14985153_DEL	13	64	8	79	1,88E-05	0,096436968	3R:19159431	sqz	upstream_gene_variant	4,72562829
X3R_9150229_DEL	53	26	72	24	1,89E-05	0,096726025	3R:13324507	PK2-R2	downstream_gene_variant	4,723082311
X3R_18420993_DEL	64	17	74	21	1,90E-05	0,096773639	3R:22595271	Efa6	intron_variant	4,720979961	Efa6
X3R_8934699_SNP	11	65	19	72	1,90E-05	0,096773639	3R:13108977	CR46019	upstream_gene_variant	4,72038689
X3R_8934699_SNP	11	65	19	72	1,90E-05	0,096773639	3R:13108977	timeout	intron_variant	4,72038689	timeout
X3R_8667916_SNP	52	32	48	46	1,92E-05	0,097246368	3R:12842194	beat-Va	3_prime_UTR_variant	4,717035027	beat-Va
X3R_9165504_SNP	33	47	51	42	1,93E-05	0,097509333	3R:13339782	PK2-R1	intron_variant	4,71451718	PK2-R1
X3R_9013233_SNP	43	42	28	62	1,93E-05	0,097509333	3R:13187511	CG14380	upstream_gene_variant	4,713401633
X3R_9013233_SNP	43	42	28	62	1,93E-05	0,097509333	3R:13187511	CG8141	upstream_gene_variant	4,713401633
X3R_9013233_SNP	43	42	28	62	1,93E-05	0,097509333	3R:13187511	CG8508	upstream_gene_variant	4,713401633
X3R_14346807_SNP	34	44	42	52	1,96E-05	0,098452864	3R:18521085	fru	intron_variant	4,707316492	fru
X3R_9187828_SNP	77	11	91	12	1,96E-05	0,098452864	3R:13362106	poly	missense_variant	4,706772728	poly
X3R_9187828_SNP	77	11	91	12	1,96E-05	0,098452864	3R:13362106	Dic1	upstream_gene_variant	4,706772728
X3R_9149992_SNP	24	60	19	77	1,97E-05	0,098528118	3R:13324270	CG45080	upstream_gene_variant	4,705132512
X3R_9149992_SNP	24	60	19	77	1,97E-05	0,098528118	3R:13324270	PK2-R2	downstream_gene_variant	4,705132512
X3R_9193468_SNP	28	57	39	55	1,98E-05	0,098528118	3R:13367746	CG34309	upstream_gene_variant	4,703906129
X3R_9193468_SNP	28	57	39	55	1,98E-05	0,098528118	3R:13367746	CheA87a	upstream_gene_variant	4,703906129
X3R_9193468_SNP	28	57	39	55	1,98E-05	0,098528118	3R:13367746	Dic1	5_prime_UTR_variant	4,703906129	Dic1
X3R_9193468_SNP	28	57	39	55	1,98E-05	0,098528118	3R:13367746	Lip3	downstream_gene_variant	4,703906129
X3R_9193468_SNP	28	57	39	55	1,98E-05	0,098528118	3R:13367746	poly	upstream_gene_variant	4,703906129
X3R_9452404_SNP	12	74	16	83	1,98E-05	0,098528118	3R:13626682	CR45594	downstream_gene_variant	4,702796443
X3R_9128314_SNP	45	38	42	51	2,00E-05	0,098922029	3R:13302592	CG32473	upstream_gene_variant	4,699855564
X3R_9128314_SNP	45	38	42	51	2,00E-05	0,098922029	3R:13302592	CG43208	upstream_gene_variant	4,699855564
X3R_9128314_SNP	45	38	42	51	2,00E-05	0,098922029	3R:13302592	CG8773	downstream_gene_variant	4,699855564
X3R_9128314_SNP	45	38	42	51	2,00E-05	0,098922029	3R:13302592	CG8774	downstream_gene_variant	4,699855564
X2L_15269213_SNP	54	25	73	22	2,01E-05	0,099081985	2L:15269213	Cul3	intron_variant	4,69741065	Cul3
X2L_15269213_SNP	54	25	73	22	2,01E-05	0,099081985	2L:15269213	UK114	downstream_gene_variant	4,69741065
X2L_15269213_SNP	54	25	73	22	2,01E-05	0,099081985	2L:15269213	yuri	upstream_gene_variant	4,69741065
X3R_9105550_SNP	67	16	61	34	2,01E-05	0,099081985	3R:13279828	CG8630	5_prime_UTR_variant	4,696609526	CG8630
X3R_9044857_SNP	9	80	7	92	2,02E-05	0,099081985	3R:13219135	Ace	downstream_gene_variant	4,695549758
X3R_9044857_SNP	9	80	7	92	2,02E-05	0,099081985	3R:13219135	CG8476	downstream_gene_variant	4,695549758
X3R_9044857_SNP	9	80	7	92	2,02E-05	0,099081985	3R:13219135	CG8483	upstream_gene_variant	4,695549758
X3R_9152775_SNP	51	30	52	45	2,03E-05	0,09955411	3R:13327053	PK2-R2	downstream_gene_variant	4,692290504
X2L_15799439_SNP	65	16	81	16	2,05E-05	0,100392861	2L:15799439	-	intergenic_variant	4,687455384
X2L_17025846_SNP	20	66	14	84	2,07E-05	0,100857508	2L:17025846	-	intergenic_variant	4,68426176
X3R_10822437_SNP	52	33	52	44	2,08E-05	0,10096443	3R:14996715	-	intergenic_variant	4,682616617
X3R_8990896_SNP	38	46	34	62	2,09E-05	0,101284685	3R:13165174	timeout	downstream_gene_variant	4,680059481
X2L_16714196_INS	68	11	86	9	2,12E-05	0,102284596	2L:16714196	CG31808	intron_variant	4,67461448	CG31808
X2L_16714196_INS	68	11	86	9	2,12E-05	0,102284596	2L:16714196	Cyt-c-d	upstream_gene_variant	4,67461448
X3R_8654658_SNP	29	53	55	39	2,13E-05	0,102596706	3R:12828936	-	intergenic_variant	4,672115938
X3R_11237346_SNP	53	30	55	39	2,13E-05	0,102607422	3R:15411624	Atx2	intron_variant	4,670898396	Atx2
X3R_11237346_SNP	53	30	55	39	2,13E-05	0,102607422	3R:15411624	CG6125	upstream_gene_variant	4,670898396
X3R_8654655_SNP	54	29	39	54	2,16E-05	0,103355718	3R:12828933	-	intergenic_variant	4,666193548
X3R_8935338_SNP	24	57	35	58	2,16E-05	0,103355718	3R:13109616	timeout	synonymous_variant	4,665407739	timeout
X3R_8935338_SNP	24	57	35	58	2,16E-05	0,103355718	3R:13109616	CR46019	upstream_gene_variant	4,665407739
X2R_4022327_SNP	18	64	24	69	2,18E-05	0,104180866	2R:8134822	Obp44a	synonymous_variant	4,660791514	Obp44a
X2R_4022327_SNP	18	64	24	69	2,18E-05	0,104180866	2R:8134822	CG42516	upstream_gene_variant	4,660791514
X2R_4022327_SNP	18	64	24	69	2,18E-05	0,104180866	2R:8134822	Lpin	downstream_gene_variant	4,660791514
X2R_4022327_SNP	18	64	24	69	2,18E-05	0,104180866	2R:8134822	Pabp2	downstream_gene_variant	4,660791514
X2R_4022327_SNP	18	64	24	69	2,18E-05	0,104180866	2R:8134822	Pbp49	upstream_gene_variant	4,660791514
X3R_9262173_SNP	60	24	60	28	2,20E-05	0,104439414	3R:13436451	CR42756	downstream_gene_variant	4,658555385
X3R_9262173_SNP	60	24	60	28	2,20E-05	0,104439414	3R:13436451	yrt	upstream_gene_variant	4,658555385
X3R_9100401_SNP	63	17	62	33	2,21E-05	0,104654876	3R:13274679	CG8449	upstream_gene_variant	4,656503768
X3R_9100401_SNP	63	17	62	33	2,21E-05	0,104654876	3R:13274679	Su(var)3-7	downstream_gene_variant	4,656503768
X3R_12653824_SNP	22	60	36	61	2,23E-05	0,105634169	3R:16828102	abd-A	5_prime_UTR_variant	4,65091722	abd-A
X3R_12653824_SNP	22	60	36	61	2,23E-05	0,105634169	3R:16828102	abd-A	intron_variant	4,65091722	abd-A
X3R_12653824_SNP	22	60	36	61	2,23E-05	0,105634169	3R:16828102	iab-8	downstream_gene_variant	4,65091722
X3R_8866873_SNP	29	56	40	59	2,24E-05	0,105634169	3R:13041151	snk	splice_region_variant,intron_variant	4,65015486	snk
X3R_8866873_SNP	29	56	40	59	2,24E-05	0,105634169	3R:13041151	CG11668	downstream_gene_variant	4,65015486
X3R_8866873_SNP	29	56	40	59	2,24E-05	0,105634169	3R:13041151	CG11670	upstream_gene_variant	4,65015486
X3R_8866873_SNP	29	56	40	59	2,24E-05	0,105634169	3R:13041151	CG45122	upstream_gene_variant	4,65015486
X3R_8866873_SNP	29	56	40	59	2,24E-05	0,105634169	3R:13041151	Hsc70-2	upstream_gene_variant	4,65015486
X3R_8866873_SNP	29	56	40	59	2,24E-05	0,105634169	3R:13041151	ry	downstream_gene_variant	4,65015486
X2R_9608334_SNP	11	78	7	92	2,27E-05	0,106769278	2R:13720829	fas	intron_variant	4,644365567	fas
X3R_9030772_SNP	52	27	62	34	2,28E-05	0,106818967	3R:13205050	CG8483	downstream_gene_variant	4,64243141
X3R_9054461_SNP	58	20	60	36	2,29E-05	0,106818967	3R:13228739	Ace	3_prime_UTR_variant	4,640826515	Ace
X3R_9054461_SNP	58	20	60	36	2,29E-05	0,106818967	3R:13228739	Ace	intron_variant	4,640826515	Ace
X2R_6073753_SNP	77	13	88	13	2,29E-05	0,106818967	2R:10186248	KCNQ	intron_variant	4,640739342	KCNQ
X3R_21127315_SNP	56	29	69	24	2,30E-05	0,107059404	3R:25301593	CG13659	missense_variant	4,638627487	CG13659
X3R_21127315_SNP	56	29	69	24	2,30E-05	0,107059404	3R:25301593	CG10550	downstream_gene_variant	4,638627487
X3R_21127315_SNP	56	29	69	24	2,30E-05	0,107059404	3R:25301593	CG31097	upstream_gene_variant	4,638627487
X3R_21127315_SNP	56	29	69	24	2,30E-05	0,107059404	3R:25301593	CG31288	upstream_gene_variant	4,638627487
X3R_21127315_SNP	56	29	69	24	2,30E-05	0,107059404	3R:25301593	CG31370	upstream_gene_variant	4,638627487
X3R_21127315_SNP	56	29	69	24	2,30E-05	0,107059404	3R:25301593	CG31436	upstream_gene_variant	4,638627487
X3R_9149253_SNP	10	76	9	90	2,32E-05	0,107494291	3R:13323531	CG45080	upstream_gene_variant	4,635158322
X3R_9180403_SNP	73	13	88	11	2,32E-05	0,107494291	3R:13354681	mthl12	missense_variant	4,633968551	mthl12
X3R_9150053_SNP	23	59	22	71	2,33E-05	0,107494291	3R:13324331	PK2-R2	downstream_gene_variant	4,632927115
X3R_9195544_SNP	48	35	66	30	2,33E-05	0,107494291	3R:13369822	CheA87a	missense_variant	4,632190823	CheA87a
X3R_9195544_SNP	48	35	66	30	2,33E-05	0,107494291	3R:13369822	CG34309	upstream_gene_variant	4,632190823
X3R_9195544_SNP	48	35	66	30	2,33E-05	0,107494291	3R:13369822	CG9813	downstream_gene_variant	4,632190823
X3R_9195544_SNP	48	35	66	30	2,33E-05	0,107494291	3R:13369822	Dic1	downstream_gene_variant	4,632190823
X3R_9195544_SNP	48	35	66	30	2,33E-05	0,107494291	3R:13369822	Lip3	downstream_gene_variant	4,632190823
X3R_9195544_SNP	48	35	66	30	2,33E-05	0,107494291	3R:13369822	poly	upstream_gene_variant	4,632190823
X2R_12449201_SNP	64	24	71	28	2,34E-05	0,107494291	2R:16561696	CG4945	upstream_gene_variant	4,629944206
X2R_12449201_SNP	64	24	71	28	2,34E-05	0,107494291	2R:16561696	DAT	intron_variant	4,629944206	DAT
X2R_12449201_SNP	64	24	71	28	2,34E-05	0,107494291	2R:16561696	Syn2	downstream_gene_variant	4,629944206
X3R_8947650_DEL	28	32	36	32	2,35E-05	0,107494291	3R:13121928	2mit	downstream_gene_variant	4,629213689
X3R_8947650_DEL	28	32	36	32	2,35E-05	0,107494291	3R:13121928	timeout	intron_variant	4,629213689	timeout
X3R_9158626_SNP	32	49	34	58	2,35E-05	0,107494291	3R:13332904	PK2-R2	intron_variant	4,629001076	PK2-R2
X3R_8555614_SNP	24	57	40	53	2,38E-05	0,108606004	3R:12729892	CR44231	downstream_gene_variant	4,623420488
X3R_8961521_SNP	50	28	62	33	2,39E-05	0,108809917	3R:13135799	2mit	intron_variant	4,621496537	2mit
X3R_8961521_SNP	50	28	62	33	2,39E-05	0,108809917	3R:13135799	2mit	upstream_gene_variant	4,621496537
X3R_8961521_SNP	50	28	62	33	2,39E-05	0,108809917	3R:13135799	CR45109	intron_variant,non_coding_transcript_variant	4,621496537	CR45109
X3R_8961521_SNP	50	28	62	33	2,39E-05	0,108809917	3R:13135799	timeout	intron_variant	4,621496537	timeout
X2R_6056815_SNP	47	26	48	32	2,42E-05	0,109939865	2R:10169310	KCNQ	intron_variant	4,615903331	KCNQ
X3R_8760268_SNP	25	54	46	47	2,45E-05	0,110822754	3R:12934546	beat-Vb	3_prime_UTR_variant	4,611325922	beat-Vb
X3R_8760268_SNP	25	54	46	47	2,45E-05	0,110822754	3R:12934546	CR44236	upstream_gene_variant	4,611325922
X3R_9135749_SNP	31	49	40	58	2,46E-05	0,111004464	3R:13310027	CG32473	intron_variant	4,609513542	CG32473
X3R_9135749_SNP	31	49	40	58	2,46E-05	0,111004464	3R:13310027	CG44142	downstream_gene_variant	4,609513542
X2R_5185307_SNP	75	13	91	8	2,47E-05	0,111194267	2R:9297802	Drep-2	intron_variant	4,607673498	Drep-2
X2R_3369770_SNP	14	73	11	91	2,49E-05	0,112044269	2R:7482265	wech	3_prime_UTR_variant	4,603270928	wech
X2R_3369770_SNP	14	73	11	91	2,49E-05	0,112044269	2R:7482265	wech	downstream_gene_variant	4,603270928
X3R_9190082_SNP	75	11	92	8	2,52E-05	0,112628755	3R:13364360	Dic1	upstream_gene_variant	4,599458557
X3R_9190082_SNP	75	11	92	8	2,52E-05	0,112628755	3R:13364360	poly	5_prime_UTR_variant	4,599458557	poly
X3R_9190082_SNP	75	11	92	8	2,52E-05	0,112628755	3R:13364360	poly	intron_variant	4,599458557	poly
X3R_9833572_SNP	56	20	66	21	2,52E-05	0,112628755	3R:14007850	rdx	intron_variant	4,598828903	rdx
X3R_9097949_SNP	52	26	52	37	2,53E-05	0,113014039	3R:13272227	CG8449	upstream_gene_variant	4,596258693
X3R_9097949_SNP	52	26	52	37	2,53E-05	0,113014039	3R:13272227	Su(var)3-7	downstream_gene_variant	4,596258693
X3R_9185490_SNP	29	50	29	69	2,55E-05	0,113441363	3R:13359768	mthl12	downstream_gene_variant	4,593500526
X3R_9185490_SNP	29	50	29	69	2,55E-05	0,113441363	3R:13359768	poly	downstream_gene_variant	4,593500526
X3R_9029138_SNP	14	69	26	71	2,56E-05	0,113441363	3R:13203416	-	intergenic_variant	4,592163981
X2R_6084728_INS	35	37	39	42	2,56E-05	0,113441363	2R:10197223	CG34221	3_prime_UTR_variant	4,591104507	CG34221
X2R_6084728_INS	35	37	39	42	2,56E-05	0,113441363	2R:10197223	CG34221	downstream_gene_variant	4,591104507
X2R_6084728_INS	35	37	39	42	2,56E-05	0,113441363	2R:10197223	KCNQ	upstream_gene_variant	4,591104507
X2R_12449167_SNP	32	27	38	29	2,57E-05	0,113441363	2R:16561662	CG4945	upstream_gene_variant	4,59029828
X2R_12449167_SNP	32	27	38	29	2,57E-05	0,113441363	2R:16561662	DAT	intron_variant	4,59029828	DAT
X2R_12449167_SNP	32	27	38	29	2,57E-05	0,113441363	2R:16561662	Syn2	downstream_gene_variant	4,59029828
X3R_9258693_SNP	43	42	49	48	2,59E-05	0,114086726	3R:13432971	Act87E	downstream_gene_variant	4,586760941
X3R_9258693_SNP	43	42	49	48	2,59E-05	0,114086726	3R:13432971	yrt	intron_variant	4,586760941	yrt
X3R_8668114_SNP	52	29	42	52	2,60E-05	0,114126395	3R:12842392	beat-Va	intron_variant	4,58519088	beat-Va
X_8440176_SNP	70	20	80	21	2,60E-05	0,114126395	X:8546143	Nrg	synonymous_variant	4,58422495	Nrg
X3R_11237373_SNP	31	54	38	54	2,61E-05	0,114126395	3R:15411651	Atx2	intron_variant	4,582912948	Atx2
X3R_11237373_SNP	31	54	38	54	2,61E-05	0,114126395	3R:15411651	CG6125	upstream_gene_variant	4,582912948
X2R_20253495_SNP	28	57	22	75	2,62E-05	0,114126395	2R:24365972	bs	intron_variant	4,582341675	bs
X2R_20253495_SNP	28	57	22	75	2,62E-05	0,114126395	2R:24365972	CR44811	intron_variant,non_coding_transcript_variant	4,582341675	CR44811
X3R_9116213_SNP	77	10	93	9	2,66E-05	0,115660003	3R:13290491	CG15887	upstream_gene_variant	4,574826863
X3R_9116213_SNP	77	10	93	9	2,66E-05	0,115660003	3R:13290491	CG15888	upstream_gene_variant	4,574826863
X3R_9116213_SNP	77	10	93	9	2,66E-05	0,115660003	3R:13290491	CG8773	upstream_gene_variant	4,574826863
X3R_9116213_SNP	77	10	93	9	2,66E-05	0,115660003	3R:13290491	Osi22	upstream_gene_variant	4,574826863
X3R_9116213_SNP	77	10	93	9	2,66E-05	0,115660003	3R:13290491	wntD	downstream_gene_variant	4,574826863
X3L_7600943_SNP	42	15	32	18	2,67E-05	0,115660003	3L:7607843	CG33275	intron_variant	4,574059063	CG33275
X3R_9136866_SNP	10	75	10	90	2,67E-05	0,115660003	3R:13311144	CG32473	intron_variant	4,573370666	CG32473
X3R_9136866_SNP	10	75	10	90	2,67E-05	0,115660003	3R:13311144	CG44142	downstream_gene_variant	4,573370666
X3R_8991450_SNP	21	61	20	74	2,70E-05	0,116848467	3R:13165728	timeout	downstream_gene_variant	4,567878009
X3L_13944089_SNP	8	81	10	89	2,74E-05	0,118074633	3L:13950989	CG32137	intron_variant	4,562294137	CG32137
X3R_9193261_SNP	55	30	56	39	2,77E-05	0,118886837	3R:13367539	CheA87a	upstream_gene_variant	4,558269211
X3R_9193261_SNP	55	30	56	39	2,77E-05	0,118886837	3R:13367539	Dic1	5_prime_UTR_variant	4,558269211	Dic1
X3R_9193261_SNP	55	30	56	39	2,77E-05	0,118886837	3R:13367539	Dic1	intron_variant	4,558269211	Dic1
X3R_9193261_SNP	55	30	56	39	2,77E-05	0,118886837	3R:13367539	Lip3	downstream_gene_variant	4,558269211
X3R_9193261_SNP	55	30	56	39	2,77E-05	0,118886837	3R:13367539	poly	upstream_gene_variant	4,558269211
X3R_9181042_SNP	50	29	60	31	2,79E-05	0,119295677	3R:13355320	mthl12	missense_variant	4,554449036	mthl12
X3R_9035867_SNP	49	30	61	34	2,80E-05	0,119295677	3R:13210145	CG8483	synonymous_variant	4,552856859	CG8483
X3R_9445746_SNP	72	12	77	22	2,80E-05	0,119295677	3R:13620024	CG9269	downstream_gene_variant	4,55278691
X3R_9445746_SNP	72	12	77	22	2,80E-05	0,119295677	3R:13620024	CR45680	upstream_gene_variant	4,55278691
X2L_2271399_SNP	9	79	10	89	2,81E-05	0,119295677	2L:2271399	CG17242	upstream_gene_variant	4,551933693
X2L_2271399_SNP	9	79	10	89	2,81E-05	0,119295677	2L:2271399	CR43753	downstream_gene_variant	4,551933693
X2L_2271399_SNP	9	79	10	89	2,81E-05	0,119295677	2L:2271399	CR43753	non_coding_transcript_exon_variant	4,551933693	CR43753
X2L_12875098_SNP	15	65	21	74	2,81E-05	0,119295677	2L:12875098	-	intergenic_variant	4,551070563
X3R_8937238_SNP	59	21	75	22	2,81E-05	0,119295677	3R:13111516	timeout	intron_variant	4,55054428	timeout
X3R_9113330_SNP	49	33	46	45	2,85E-05	0,120309304	3R:13287608	CG15887	downstream_gene_variant	4,545196895
X3R_9113330_SNP	49	33	46	45	2,85E-05	0,120309304	3R:13287608	CG15888	upstream_gene_variant	4,545196895
X3R_9113330_SNP	49	33	46	45	2,85E-05	0,120309304	3R:13287608	CG8630	downstream_gene_variant	4,545196895
X3R_9113330_SNP	49	33	46	45	2,85E-05	0,120309304	3R:13287608	Osi22	upstream_gene_variant	4,545196895
X3R_9113330_SNP	49	33	46	45	2,85E-05	0,120309304	3R:13287608	wntD	downstream_gene_variant	4,545196895
X3R_13309647_SNP	49	34	69	28	2,85E-05	0,120309304	3R:17483925	Dscam3	missense_variant	4,544811498	Dscam3
X3R_8784391_SNP	70	15	75	20	2,88E-05	0,120986937	3R:12958669	grsm	intron_variant	4,541346743	grsm
X3R_8784391_SNP	70	15	75	20	2,88E-05	0,120986937	3R:12958669	Spc25	upstream_gene_variant	4,541346743
X3R_26999653_SNP	54	31	73	26	2,90E-05	0,121769577	3R:31173931	Gycbeta100B	intron_variant	4,536948805	Gycbeta100B
X3R_26999653_SNP	54	31	73	26	2,90E-05	0,121769577	3R:31173931	mesh	downstream_gene_variant	4,536948805
X3R_26999653_SNP	54	31	73	26	2,90E-05	0,121769577	3R:31173931	stops	upstream_gene_variant	4,536948805
X3R_8977123_SNP	67	18	67	29	2,91E-05	0,121769577	3R:13151401	2mit	intron_variant	4,536502683	2mit
X3R_8977123_SNP	67	18	67	29	2,91E-05	0,121769577	3R:13151401	CR45109	intron_variant,non_coding_transcript_variant	4,536502683	CR45109
X3R_8977123_SNP	67	18	67	29	2,91E-05	0,121769577	3R:13151401	timeout	intron_variant	4,536502683	timeout
X3R_9191292_SNP	61	22	73	28	2,92E-05	0,122079586	3R:13365570	CheA87a	upstream_gene_variant	4,534307601
X3R_9191292_SNP	61	22	73	28	2,92E-05	0,122079586	3R:13365570	Dic1	intron_variant	4,534307601	Dic1
X3R_9191292_SNP	61	22	73	28	2,92E-05	0,122079586	3R:13365570	Dic1	upstream_gene_variant	4,534307601
X3R_9191292_SNP	61	22	73	28	2,92E-05	0,122079586	3R:13365570	Lip3	downstream_gene_variant	4,534307601
X3R_9191292_SNP	61	22	73	28	2,92E-05	0,122079586	3R:13365570	poly	intron_variant	4,534307601	poly
X3R_9191292_SNP	61	22	73	28	2,92E-05	0,122079586	3R:13365570	poly	upstream_gene_variant	4,534307601
X2R_7073488_SNP	64	20	67	32	2,93E-05	0,122079586	2R:11185983	shn	intron_variant	4,533364263	shn
X3R_8668096_SNP	13	70	31	65	2,95E-05	0,122501939	3R:12842374	beat-Va	intron_variant	4,530733942	beat-Va
X3L_11742040_SNP	53	34	61	37	2,95E-05	0,122501939	3L:11748940	CG6024	intron_variant	4,529839661	CG6024
X3L_11742040_SNP	53	34	61	37	2,95E-05	0,122501939	3L:11748940	Gr68a	upstream_gene_variant	4,529839661
X3R_9082579_SNP	18	64	12	89	2,96E-05	0,122670394	3R:13256857	Ace	intron_variant	4,528234052	Ace
X3R_9082579_SNP	18	64	12	89	2,96E-05	0,122670394	3R:13256857	CG11686	upstream_gene_variant	4,528234052
X3R_9425894_SNP	53	26	67	31	3,02E-05	0,124275727	3R:13600172	-	intergenic_variant	4,520705049
X2L_10719730_SNP	28	57	31	66	3,02E-05	0,124275727	2L:10719730	CG6431	upstream_gene_variant	4,520576871
X3R_8818477_INS	22	59	34	55	3,04E-05	0,124810864	3R:12992755	yellow-f	frameshift_variant	4,517708962	yellow-f
X3R_8818477_INS	22	59	34	55	3,04E-05	0,124810864	3R:12992755	yellow-f	splice_region_variant,intron_variant	4,517708962	yellow-f
X3R_8818477_INS	22	59	34	55	3,04E-05	0,124810864	3R:12992755	CG14383	upstream_gene_variant	4,517708962
X3R_8818477_INS	22	59	34	55	3,04E-05	0,124810864	3R:12992755	CG17327	downstream_gene_variant	4,517708962
X3R_8818477_INS	22	59	34	55	3,04E-05	0,124810864	3R:12992755	CG31342	downstream_gene_variant	4,517708962
X3R_8818477_INS	22	59	34	55	3,04E-05	0,124810864	3R:12992755	CG44194	downstream_gene_variant	4,517708962
X3R_8818477_INS	22	59	34	55	3,04E-05	0,124810864	3R:12992755	CG7488	upstream_gene_variant	4,517708962
X3R_8818477_INS	22	59	34	55	3,04E-05	0,124810864	3R:12992755	yellow-f2	downstream_gene_variant	4,517708962
X3R_9183475_SNP	48	31	56	33	3,05E-05	0,125024831	3R:13357753	mthl12	downstream_gene_variant	4,515878472
X3R_9183475_SNP	48	31	56	33	3,05E-05	0,125024831	3R:13357753	poly	downstream_gene_variant	4,515878472
X3R_24839165_SNP	48	36	37	59	3,06E-05	0,125024831	3R:29013443	mir-4947	upstream_gene_variant	4,514968315
X3R_24839165_SNP	48	36	37	59	3,06E-05	0,125024831	3R:29013443	wat	intron_variant	4,514968315	wat
X3R_19073137_SNP	58	25	62	30	3,08E-05	0,125677026	3R:23247415	CG4449	downstream_gene_variant	4,511713748
X3R_19073137_SNP	58	25	62	30	3,08E-05	0,125677026	3R:23247415	CG4467	intron_variant	4,511713748	CG4467
X3R_19073137_SNP	58	25	62	30	3,08E-05	0,125677026	3R:23247415	EloA	upstream_gene_variant	4,511713748
X3R_9235787_SNP	40	46	42	52	3,09E-05	0,125945412	3R:13410065	yellow-e	synonymous_variant	4,509465654	yellow-e
X3R_9235787_SNP	40	46	42	52	3,09E-05	0,125945412	3R:13410065	yellow-e2	upstream_gene_variant	4,509465654
X3R_9145199_SNP	72	15	90	11	3,10E-05	0,125945412	3R:13319477	CG45080	upstream_gene_variant	4,50880421
X3L_17281148_SNP	32	53	22	76	3,13E-05	0,126950266	3L:17288048	-	intergenic_variant	4,504364789
X3R_9439832_SNP	71	14	77	21	3,15E-05	0,127114833	3R:13614110	CG9269	upstream_gene_variant	4,50206172
X3R_9439832_SNP	71	14	77	21	3,15E-05	0,127114833	3R:13614110	CG9757	upstream_gene_variant	4,50206172
X3R_9439832_SNP	71	14	77	21	3,15E-05	0,127114833	3R:13614110	CG9759	upstream_gene_variant	4,50206172
X3R_9439832_SNP	71	14	77	21	3,15E-05	0,127114833	3R:13614110	CR45680	downstream_gene_variant	4,50206172
X2R_10840413_SNP	39	39	39	56	3,15E-05	0,127114833	2R:14952908	aPKC	intron_variant	4,50183258	aPKC
X2R_10840413_SNP	39	39	39	56	3,15E-05	0,127114833	2R:14952908	aPKC	upstream_gene_variant	4,50183258
X3R_8715260_SNP	56	24	58	38	3,21E-05	0,128912654	3R:12889538	CR33929	downstream_gene_variant	4,49415015
X3R_8715260_SNP	56	24	58	38	3,21E-05	0,128912654	3R:12889538	CR44235	downstream_gene_variant	4,49415015
X3R_8715260_SNP	56	24	58	38	3,21E-05	0,128912654	3R:12889538	d-cup	upstream_gene_variant	4,49415015
X3R_9165492_SNP	13	76	10	92	3,21E-05	0,128912654	3R:13339770	PK2-R1	intron_variant	4,493160919	PK2-R1
X3R_9403301_SNP	10	78	18	77	3,22E-05	0,128912654	3R:13577579	CR43848	downstream_gene_variant	4,492795519
X3R_9015130_SNP	21	63	15	85	3,23E-05	0,129242668	3R:13189408	CG14380	3_prime_UTR_variant	4,490285366	CG14380
X3R_9015130_SNP	21	63	15	85	3,23E-05	0,129242668	3R:13189408	CG8141	upstream_gene_variant	4,490285366
X3R_9015130_SNP	21	63	15	85	3,23E-05	0,129242668	3R:13189408	CG8508	upstream_gene_variant	4,490285366
X3R_9121156_SNP	52	29	67	29	3,24E-05	0,129242668	3R:13295434	CG8773	synonymous_variant	4,489737641	CG8773
X3R_9121156_SNP	52	29	67	29	3,24E-05	0,129242668	3R:13295434	CG8774	upstream_gene_variant	4,489737641
X3R_9121156_SNP	52	29	67	29	3,24E-05	0,129242668	3R:13295434	Osi22	downstream_gene_variant	4,489737641
X3R_9121156_SNP	52	29	67	29	3,24E-05	0,129242668	3R:13295434	wntD	upstream_gene_variant	4,489737641
X2R_14383446_SNP	63	22	76	19	3,25E-05	0,129489131	2R:18495941	CG30116	intron_variant	4,48793975	CG30116
X3R_8941508_SNP	21	62	24	72	3,27E-05	0,130109383	3R:13115786	timeout	intron_variant	4,484896122	timeout
X3R_9260543_SNP	13	74	19	78	3,30E-05	0,130849237	3R:13434821	CR42756	downstream_gene_variant	4,481467373
X3R_9260543_SNP	13	74	19	78	3,30E-05	0,130849237	3R:13434821	yrt	5_prime_UTR_variant	4,481467373	yrt
X2L_10635033_SNP	77	10	88	7	3,32E-05	0,131205504	2L:10635033	CG31872	upstream_gene_variant	4,479322486
X2L_10635033_SNP	77	10	88	7	3,32E-05	0,131205504	2L:10635033	CG7329	intron_variant	4,479322486	CG7329
X2L_10635033_SNP	77	10	88	7	3,32E-05	0,131205504	2L:10635033	CG7329	upstream_gene_variant	4,479322486
X2L_10635033_SNP	77	10	88	7	3,32E-05	0,131205504	2L:10635033	CR45351	upstream_gene_variant	4,479322486
X2R_6994340_SNP	44	30	48	25	3,35E-05	0,131714723	2R:11106835	luna	intron_variant	4,475399308	lu
X2R_6994340_SNP	44	30	48	25	3,35E-05	0,131714723	2R:11106835	luna	upstream_gene_variant	4,475399308
X2L_2759095_SNP	34	40	27	64	3,35E-05	0,131714723	2L:2759095	CG9960	missense_variant	4,474807428	CG9960
X2L_2759095_SNP	34	40	27	64	3,35E-05	0,131714723	2L:2759095	Bacc	downstream_gene_variant	4,474807428
X2L_2759095_SNP	34	40	27	64	3,35E-05	0,131714723	2L:2759095	CG3077	downstream_gene_variant	4,474807428
X2L_2759095_SNP	34	40	27	64	3,35E-05	0,131714723	2L:2759095	CR44772	upstream_gene_variant	4,474807428
X2L_2759095_SNP	34	40	27	64	3,35E-05	0,131714723	2L:2759095	Snapin	3_prime_UTR_variant	4,474807428	Spin
X2L_2759095_SNP	34	40	27	64	3,35E-05	0,131714723	2L:2759095	Trn-SR	upstream_gene_variant	4,474807428
X3R_9035837_SNP	49	30	59	33	3,35E-05	0,131714723	3R:13210115	CG8483	synonymous_variant	4,474760906	CG8483
X3R_9135804_SNP	28	53	34	67	3,37E-05	0,132121406	3R:13310082	CG32473	intron_variant	4,471733172	CG32473
X3R_9135804_SNP	28	53	34	67	3,37E-05	0,132121406	3R:13310082	CG44142	downstream_gene_variant	4,471733172
X2R_9955367_SNP	50	36	74	22	3,38E-05	0,132121406	2R:14067862	Prosap	intron_variant	4,471513053	Prosap
X2R_20253896_SNP	52	34	65	31	3,40E-05	0,132244714	2R:24366373	bs	intron_variant	4,468728316	bs
X2R_20253896_SNP	52	34	65	31	3,40E-05	0,132244714	2R:24366373	CR44811	intron_variant,non_coding_transcript_variant	4,468728316	CR44811
X3R_9331625_INS	40	30	33	34	3,40E-05	0,132244714	3R:13505903	-	intergenic_variant	4,468705953
X3R_9109525_SNP	30	49	37	56	3,40E-05	0,132244714	3R:13283803	CG8630	synonymous_variant	4,468260074	CG8630
X3R_9109525_SNP	30	49	37	56	3,40E-05	0,132244714	3R:13283803	CG15887	downstream_gene_variant	4,468260074
X3R_9109525_SNP	30	49	37	56	3,40E-05	0,132244714	3R:13283803	CG15888	downstream_gene_variant	4,468260074
X3R_9199770_SNP	45	34	62	35	3,44E-05	0,133430367	3R:13374048	CG34309	downstream_gene_variant	4,462959808
X3R_9199770_SNP	45	34	62	35	3,44E-05	0,133430367	3R:13374048	CG9813	intron_variant	4,462959808	CG9813
X3R_9199770_SNP	45	34	62	35	3,44E-05	0,133430367	3R:13374048	CheA87a	downstream_gene_variant	4,462959808
X3R_9199770_SNP	45	34	62	35	3,44E-05	0,133430367	3R:13374048	CR44138	upstream_gene_variant	4,462959808
X3R_9199770_SNP	45	34	62	35	3,44E-05	0,133430367	3R:13374048	Dic1	downstream_gene_variant	4,462959808
X3R_9199770_SNP	45	34	62	35	3,44E-05	0,133430367	3R:13374048	Lip3	upstream_gene_variant	4,462959808
X2L_15597730_SNP	23	49	18	77	3,45E-05	0,133430367	2L:15597730	-	intergenic_variant	4,462495473
X3R_21119572_SNP	29	51	31	66	3,51E-05	0,135685168	3R:25293850	CG31102	splice_region_variant,synonymous_variant	4,454276729	CG31102
X3R_21119572_SNP	29	51	31	66	3,51E-05	0,135685168	3R:25293850	CG11893	downstream_gene_variant	4,454276729
X3R_21119572_SNP	29	51	31	66	3,51E-05	0,135685168	3R:25293850	CG13658	downstream_gene_variant	4,454276729
X3R_21119572_SNP	29	51	31	66	3,51E-05	0,135685168	3R:25293850	CG31097	downstream_gene_variant	4,454276729
X3R_21119572_SNP	29	51	31	66	3,51E-05	0,135685168	3R:25293850	CG31098	upstream_gene_variant	4,454276729
X3R_21119572_SNP	29	51	31	66	3,51E-05	0,135685168	3R:25293850	CG31288	downstream_gene_variant	4,454276729
X2L_17025861_SNP	19	64	14	84	3,53E-05	0,135904073	2L:17025861	-	intergenic_variant	4,452042388
X3R_9258216_SNP	38	46	33	59	3,54E-05	0,135904073	3R:13432494	yrt	synonymous_variant	4,450894311	yrt
X3R_9258216_SNP	38	46	33	59	3,54E-05	0,135904073	3R:13432494	Act87E	downstream_gene_variant	4,450894311
X3R_9094368_SNP	29	55	38	57	3,55E-05	0,135904073	3R:13268646	Su(var)3-7	synonymous_variant	4,449488775	Su(var)3-7
X3R_9094368_SNP	29	55	38	57	3,55E-05	0,135904073	3R:13268646	CG8449	downstream_gene_variant	4,449488775
X3R_9094368_SNP	29	55	38	57	3,55E-05	0,135904073	3R:13268646	Ravus	upstream_gene_variant	4,449488775
X3R_9258683_SNP	43	43	48	46	3,56E-05	0,135904073	3R:13432961	Act87E	downstream_gene_variant	4,449016509
X3R_9258683_SNP	43	43	48	46	3,56E-05	0,135904073	3R:13432961	yrt	intron_variant	4,449016509	yrt
X3R_9183496_SNP	10	76	13	89	3,56E-05	0,135904073	3R:13357774	mthl12	downstream_gene_variant	4,448901728
X3R_9183496_SNP	10	76	13	89	3,56E-05	0,135904073	3R:13357774	poly	downstream_gene_variant	4,448901728
X3R_8979958_SNP	47	34	39	55	3,59E-05	0,136937518	3R:13154236	2mit	intron_variant	4,444682776	2mit
X3R_8979958_SNP	47	34	39	55	3,59E-05	0,136937518	3R:13154236	CR45109	intron_variant,non_coding_transcript_variant	4,444682776	CR45109
X3R_8979958_SNP	47	34	39	55	3,59E-05	0,136937518	3R:13154236	timeout	intron_variant	4,444682776	timeout
X3R_9015447_DEL	62	18	78	15	3,61E-05	0,13746195	3R:13189725	CG14380	downstream_gene_variant	4,442095739
X3R_9015447_DEL	62	18	78	15	3,61E-05	0,13746195	3R:13189725	CG8141	upstream_gene_variant	4,442095739
X3R_9015447_DEL	62	18	78	15	3,61E-05	0,13746195	3R:13189725	CG8508	upstream_gene_variant	4,442095739
X_4298790_SNP	20	68	18	80	3,62E-05	0,137550126	X:4404757	CR32773	intron_variant,non_coding_transcript_variant	4,44089223	CR32773
X3R_9043065_SNP	48	30	64	29	3,63E-05	0,137602357	3R:13217343	CG8476	downstream_gene_variant	4,4398043
X3R_9043065_SNP	48	30	64	29	3,63E-05	0,137602357	3R:13217343	CG8483	upstream_gene_variant	4,4398043
X3R_9178038_SNP	58	26	71	21	3,65E-05	0,138058011	3R:13352316	mthl12	upstream_gene_variant	4,437447469
X3R_9117821_SNP	24	54	20	76	3,69E-05	0,139012153	3R:13292099	CG15887	upstream_gene_variant	4,43353717
X3R_9117821_SNP	24	54	20	76	3,69E-05	0,139012153	3R:13292099	CG8773	upstream_gene_variant	4,43353717
X3R_9117821_SNP	24	54	20	76	3,69E-05	0,139012153	3R:13292099	Osi22	downstream_gene_variant	4,43353717
X3R_9117821_SNP	24	54	20	76	3,69E-05	0,139012153	3R:13292099	wntD	3_prime_UTR_variant	4,43353717	wntD
X3R_9445889_SNP	65	12	74	23	3,71E-05	0,139803571	3R:13620167	CG9269	downstream_gene_variant	4,430154476
X3R_9445889_SNP	65	12	74	23	3,71E-05	0,139803571	3R:13620167	CR45680	upstream_gene_variant	4,430154476
X3R_8650400_SNP	58	10	41	26	3,76E-05	0,14123612	3R:12824678	-	intergenic_variant	4,424811693
X3R_9057626_INS	13	75	13	85	3,82E-05	0,143060879	3R:13231904	Ace	intron_variant	4,41832324	Ace
X3R_9258681_SNP	43	43	49	49	3,83E-05	0,143160561	3R:13432959	Act87E	downstream_gene_variant	4,41710931
X3R_9258681_SNP	43	43	49	49	3,83E-05	0,143160561	3R:13432959	yrt	intron_variant	4,41710931	yrt
X2L_12677211_SNP	16	66	13	85	3,84E-05	0,143518652	2L:12677211	pdm2	intron_variant	4,415114838	pdm2
X2L_12677211_SNP	16	66	13	85	3,84E-05	0,143518652	2L:12677211	pdm2	upstream_gene_variant	4,415114838
X2R_20253662_SNP	60	26	76	17	3,86E-05	0,143786047	2R:24366139	bs	intron_variant	4,4132019	bs
X2R_20253662_SNP	60	26	76	17	3,86E-05	0,143786047	2R:24366139	CR44811	intron_variant,non_coding_transcript_variant	4,4132019	CR44811
X3R_7659578_SNP	20	64	10	83	3,87E-05	0,143786047	3R:11833856	CG6959	intron_variant	4,4124931	CG6959
X3R_8664160_SNP	44	40	69	26	3,89E-05	0,144253593	3R:12838438	beat-Va	downstream_gene_variant	4,410179366
X3R_21127233_SNP	57	29	71	22	3,92E-05	0,145079006	3R:25301511	CG10550	downstream_gene_variant	4,406799471
X3R_21127233_SNP	57	29	71	22	3,92E-05	0,145079006	3R:25301511	CG13659	intron_variant	4,406799471	CG13659
X3R_21127233_SNP	57	29	71	22	3,92E-05	0,145079006	3R:25301511	CG31097	upstream_gene_variant	4,406799471
X3R_21127233_SNP	57	29	71	22	3,92E-05	0,145079006	3R:25301511	CG31288	upstream_gene_variant	4,406799471
X3R_21127233_SNP	57	29	71	22	3,92E-05	0,145079006	3R:25301511	CG31370	upstream_gene_variant	4,406799471
X3R_21127233_SNP	57	29	71	22	3,92E-05	0,145079006	3R:25301511	CG31436	upstream_gene_variant	4,406799471
X2R_10840476_SNP	34	50	51	44	3,94E-05	0,145681907	2R:14952971	aPKC	intron_variant	4,404098332	aPKC
X2R_10840476_SNP	34	50	51	44	3,94E-05	0,145681907	2R:14952971	aPKC	upstream_gene_variant	4,404098332
X3R_8760053_SNP	54	26	52	42	3,99E-05	0,146829115	3R:12934331	beat-Vb	intron_variant	4,399226447	beat-Vb
X3R_8760053_SNP	54	26	52	42	3,99E-05	0,146829115	3R:12934331	CR44236	upstream_gene_variant	4,399226447
X3L_15133192_SNP	11	76	9	88	3,99E-05	0,146829115	3L:15140092	CG12316	upstream_gene_variant	4,398897162
X3L_15133192_SNP	11	76	9	88	3,99E-05	0,146829115	3L:15140092	CG32147	downstream_gene_variant	4,398897162
X3L_15133192_SNP	11	76	9	88	3,99E-05	0,146829115	3L:15140092	CR45396	upstream_gene_variant	4,398897162
X3L_15133192_SNP	11	76	9	88	3,99E-05	0,146829115	3L:15140092	CR45397	upstream_gene_variant	4,398897162
X3L_15133192_SNP	11	76	9	88	3,99E-05	0,146829115	3L:15140092	Pdi	intron_variant	4,398897162	Pdi
X3L_15133192_SNP	11	76	9	88	3,99E-05	0,146829115	3L:15140092	Pex3	upstream_gene_variant	4,398897162
X3R_8736984_SNP	21	65	24	70	4,02E-05	0,147455878	3R:12911262	beat-Vb	upstream_gene_variant	4,395480303
X3R_8736984_SNP	21	65	24	70	4,02E-05	0,147455878	3R:12911262	CG10909	5_prime_UTR_variant	4,395480303	CG10909
X2R_10840408_SNP	39	38	56	40	4,03E-05	0,147455878	2R:14952903	aPKC	intron_variant	4,394309971	aPKC
X2R_10840408_SNP	39	38	56	40	4,03E-05	0,147455878	2R:14952903	aPKC	upstream_gene_variant	4,394309971
X3R_9135452_SNP	13	71	13	86	4,04E-05	0,147455878	3R:13309730	CG32473	missense_variant	4,39387574	CG32473
X3R_9135452_SNP	13	71	13	86	4,04E-05	0,147455878	3R:13309730	CG32473	intron_variant	4,39387574	CG32473
X3R_9135452_SNP	13	71	13	86	4,04E-05	0,147455878	3R:13309730	CG44142	downstream_gene_variant	4,39387574
X3R_13030182_SNP	15	72	14	85	4,05E-05	0,147455878	3R:17204460	Mur89F	upstream_gene_variant	4,393007076
X3R_8685682_SNP	16	68	34	60	4,05E-05	0,147455878	3R:12859960	CG10126	upstream_gene_variant	4,392592913
X3L_7523257_SNP	59	25	60	37	4,06E-05	0,147492858	3L:7530157	lqf	intron_variant	4,391523175	lqf
X3L_7523257_SNP	59	25	60	37	4,06E-05	0,147492858	3L:7530157	lqf	upstream_gene_variant	4,391523175
X3L_7523257_SNP	59	25	60	37	4,06E-05	0,147492858	3L:7530157	ltl	downstream_gene_variant	4,391523175
X3R_9071280_SNP	16	66	12	83	4,07E-05	0,147492858	3R:13245558	Ace	intron_variant	4,390329409	Ace
X3R_9206494_DEL	10	77	9	92	4,08E-05	0,147492858	3R:13380772	CG8870	frameshift_variant	4,389833169	CG8870
X3R_9206494_DEL	10	77	9	92	4,08E-05	0,147492858	3R:13380772	CG9799	downstream_gene_variant	4,389833169
X3R_9206494_DEL	10	77	9	92	4,08E-05	0,147492858	3R:13380772	CG9813	upstream_gene_variant	4,389833169
X3R_9206494_DEL	10	77	9	92	4,08E-05	0,147492858	3R:13380772	CR44138	downstream_gene_variant	4,389833169
X3R_9206494_DEL	10	77	9	92	4,08E-05	0,147492858	3R:13380772	Droj2	upstream_gene_variant	4,389833169
X3R_9206494_DEL	10	77	9	92	4,08E-05	0,147492858	3R:13380772	mRpS21	downstream_gene_variant	4,389833169
X3R_9178100_SNP	59	24	71	22	4,09E-05	0,147671879	3R:13352378	mthl12	upstream_gene_variant	4,388426332
X3R_9451123_SNP	9	74	17	79	4,15E-05	0,149494011	3R:13625401	-	intergenic_variant	4,382222087
X3R_10018287_SNP	81	7	83	10	4,17E-05	0,14992206	3R:14192565	Dop1R1	intron_variant	4,380103863	Dop1R1
X3R_8759499_SNP	8	78	18	79	4,19E-05	0,150202513	3R:12933777	beat-Vb	missense_variant	4,377889121	beat-Vb
X3R_8759499_SNP	8	78	18	79	4,19E-05	0,150202513	3R:12933777	CR44236	upstream_gene_variant	4,377889121
X3R_9197709_SNP	10	77	10	91	4,19E-05	0,150202513	3R:13371987	CG34309	upstream_gene_variant	4,377544539
X3R_9197709_SNP	10	77	10	91	4,19E-05	0,150202513	3R:13371987	CG9813	downstream_gene_variant	4,377544539
X3R_9197709_SNP	10	77	10	91	4,19E-05	0,150202513	3R:13371987	CheA87a	downstream_gene_variant	4,377544539
X3R_9197709_SNP	10	77	10	91	4,19E-05	0,150202513	3R:13371987	CR44138	upstream_gene_variant	4,377544539
X3R_9197709_SNP	10	77	10	91	4,19E-05	0,150202513	3R:13371987	Dic1	downstream_gene_variant	4,377544539
X3R_9197709_SNP	10	77	10	91	4,19E-05	0,150202513	3R:13371987	Lip3	upstream_gene_variant	4,377544539
X3L_2474132_SNP	22	68	30	72	4,23E-05	0,151144818	3L:2474132	CG16762	downstream_gene_variant	4,373957273
X3L_2474132_SNP	22	68	30	72	4,23E-05	0,151144818	3L:2474132	CG45186	intron_variant	4,373957273	CG45186
X3L_2474132_SNP	22	68	30	72	4,23E-05	0,151144818	3L:2474132	Cyp4d20	downstream_gene_variant	4,373957273
X2L_5543739_SNP	37	46	49	46	4,27E-05	0,152159291	2L:5543739	Lam	synonymous_variant	4,369906976	Lam
X2L_5543739_SNP	37	46	49	46	4,27E-05	0,152159291	2L:5543739	CG14015	upstream_gene_variant	4,369906976
X2L_5543739_SNP	37	46	49	46	4,27E-05	0,152159291	2L:5543739	Hel25E	upstream_gene_variant	4,369906976
X2L_5543739_SNP	37	46	49	46	4,27E-05	0,152159291	2L:5543739	Oscillin	upstream_gene_variant	4,369906976
X3R_8892047_SNP	32	43	44	46	4,27E-05	0,152159291	3R:13066325	sim	intron_variant	4,369314879	sim
X3R_9125366_SNP	43	40	54	40	4,30E-05	0,152775115	3R:13299644	CG32473	upstream_gene_variant	4,366355539
X3R_9125366_SNP	43	40	54	40	4,30E-05	0,152775115	3R:13299644	CG43208	upstream_gene_variant	4,366355539
X3R_9125366_SNP	43	40	54	40	4,30E-05	0,152775115	3R:13299644	CG8773	downstream_gene_variant	4,366355539
X3R_9125366_SNP	43	40	54	40	4,30E-05	0,152775115	3R:13299644	CG8774	intron_variant	4,366355539	CG8774
X3R_9057692_SNP	74	13	85	13	4,31E-05	0,152775115	3R:13231970	Ace	intron_variant	4,365469328	Ace
X3R_9259590_SNP	34	44	39	53	4,32E-05	0,152775115	3R:13433868	CR42756	downstream_gene_variant	4,36486091
X3R_9259590_SNP	34	44	39	53	4,32E-05	0,152775115	3R:13433868	yrt	intron_variant	4,36486091	yrt
X3R_9158314_SNP	53	23	60	28	4,32E-05	0,152775115	3R:13332592	PK2-R2	5_prime_UTR_variant	4,364107083	PK2-R2
X3R_9158314_SNP	53	23	60	28	4,32E-05	0,152775115	3R:13332592	PK2-R2	intron_variant	4,364107083	PK2-R2
X3R_8926402_SNP	18	64	23	73	4,34E-05	0,152787494	3R:13100680	CR46019	downstream_gene_variant	4,362815685
X3R_8926402_SNP	18	64	23	73	4,34E-05	0,152787494	3R:13100680	timeout	intron_variant	4,362815685	timeout
X2L_5571080_SNP	13	6	15	5	4,34E-05	0,152787494	2L:5571080	-	intergenic_variant	4,362071894
X2L_3559799_SNP	8	73	25	73	4,35E-05	0,152787494	2L:3559799	CR44309	upstream_gene_variant	4,361499561
X2L_3559799_SNP	8	73	25	73	4,35E-05	0,152787494	2L:3559799	CR44747	downstream_gene_variant	4,361499561
X3R_9150942_SNP	10	77	9	91	4,36E-05	0,152841399	3R:13325220	PK2-R2	downstream_gene_variant	4,360492295
X3R_9077232_SNP	23	60	17	83	4,38E-05	0,153003373	3R:13251510	Ace	intron_variant	4,358634675	Ace
X3R_27684431_SNP	50	30	57	33	4,39E-05	0,153003373	3R:31858709	heph	intron_variant	4,357698841	heph
X3R_14346764_SNP	37	46	42	52	4,40E-05	0,153003373	3R:18521042	fru	intron_variant	4,357029362	fru
X3R_8654992_DEL	28	54	47	43	4,40E-05	0,153003373	3R:12829270	-	intergenic_variant	4,35663271
X3R_9129522_SNP	10	76	10	93	4,41E-05	0,153140165	3R:13303800	CG32473	intron_variant	4,355398851	CG32473
X3R_9129522_SNP	10	76	10	93	4,41E-05	0,153140165	3R:13303800	CG32473	upstream_gene_variant	4,355398851
X3R_9129522_SNP	10	76	10	93	4,41E-05	0,153140165	3R:13303800	CG43208	3_prime_UTR_variant	4,355398851	CG43208
X3R_9129522_SNP	10	76	10	93	4,41E-05	0,153140165	3R:13303800	CG8774	downstream_gene_variant	4,355398851
X3R_8760876_SNP	8	78	18	80	4,43E-05	0,153205669	3R:12935154	beat-Vb	downstream_gene_variant	4,353463359
X3R_8760876_SNP	8	78	18	80	4,43E-05	0,153205669	3R:12935154	CR44236	upstream_gene_variant	4,353463359
X3R_8650099_SNP	24	55	56	39	4,44E-05	0,153205669	3R:12824377	-	intergenic_variant	4,352814366
X3R_8991430_SNP	59	21	75	22	4,44E-05	0,153205669	3R:13165708	timeout	downstream_gene_variant	4,352685701
X3R_9195172_SNP	77	10	92	10	4,50E-05	0,154629625	3R:13369450	CG34309	upstream_gene_variant	4,346860936
X3R_9195172_SNP	77	10	92	10	4,50E-05	0,154629625	3R:13369450	CG9813	downstream_gene_variant	4,346860936
X3R_9195172_SNP	77	10	92	10	4,50E-05	0,154629625	3R:13369450	CheA87a	upstream_gene_variant	4,346860936
X3R_9195172_SNP	77	10	92	10	4,50E-05	0,154629625	3R:13369450	Dic1	downstream_gene_variant	4,346860936
X3R_9195172_SNP	77	10	92	10	4,50E-05	0,154629625	3R:13369450	Lip3	downstream_gene_variant	4,346860936
X3R_9195172_SNP	77	10	92	10	4,50E-05	0,154629625	3R:13369450	poly	upstream_gene_variant	4,346860936
X3R_9117732_DEL	17	59	14	76	4,50E-05	0,154629625	3R:13292010	CG15887	upstream_gene_variant	4,346356301
X3R_9117732_DEL	17	59	14	76	4,50E-05	0,154629625	3R:13292010	CG8773	upstream_gene_variant	4,346356301
X3R_9117732_DEL	17	59	14	76	4,50E-05	0,154629625	3R:13292010	Osi22	downstream_gene_variant	4,346356301
X3R_9117732_DEL	17	59	14	76	4,50E-05	0,154629625	3R:13292010	wntD	downstream_gene_variant	4,346356301
X3R_14986342_SNP	51	31	51	43	4,51E-05	0,154629625	3R:19160620	CG42358	synonymous_variant	4,346155035	CG42358
X3R_14986342_SNP	51	31	51	43	4,51E-05	0,154629625	3R:19160620	CG11779	upstream_gene_variant	4,346155035
X3R_14986342_SNP	51	31	51	43	4,51E-05	0,154629625	3R:19160620	CG42359	downstream_gene_variant	4,346155035
X3R_14986342_SNP	51	31	51	43	4,51E-05	0,154629625	3R:19160620	nos	downstream_gene_variant	4,346155035
X3R_14986342_SNP	51	31	51	43	4,51E-05	0,154629625	3R:19160620	sqz	upstream_gene_variant	4,346155035
X3R_8712178_SNP	77	8	79	18	4,53E-05	0,155101728	3R:12886456	-	intergenic_variant	4,34399672
X_13716699_SNP	68	19	78	23	4,55E-05	0,155633992	X:13822666	Clic	upstream_gene_variant	4,341676119
X_13716699_SNP	68	19	78	23	4,55E-05	0,155633992	X:13822666	jub	downstream_gene_variant	4,341676119
X_13716699_SNP	68	19	78	23	4,55E-05	0,155633992	X:13822666	Nup93-1	upstream_gene_variant	4,341676119
X2R_15911788_SNP	47	39	58	41	4,59E-05	0,15619515	2R:20024283	-	intergenic_variant	4,33835624
X3L_11742011_SNP	34	53	38	62	4,60E-05	0,15619515	3L:11748911	CG6024	intron_variant	4,337207521	CG6024
X3L_11742011_SNP	34	53	38	62	4,60E-05	0,15619515	3L:11748911	Gr68a	upstream_gene_variant	4,337207521
X2R_14386408_SNP	73	17	92	9	4,61E-05	0,15619515	2R:18498903	CG30116	upstream_gene_variant	4,336413174
X2R_14386408_SNP	73	17	92	9	4,61E-05	0,15619515	2R:18498903	GstE11	upstream_gene_variant	4,336413174
X3R_9109150_SNP	31	51	37	54	4,61E-05	0,15619515	3R:13283428	CG8630	synonymous_variant	4,336032927	CG8630
X3R_9109150_SNP	31	51	37	54	4,61E-05	0,15619515	3R:13283428	CG15887	downstream_gene_variant	4,336032927
X3R_9109150_SNP	31	51	37	54	4,61E-05	0,15619515	3R:13283428	CG15888	downstream_gene_variant	4,336032927
X3R_9125758_SNP	32	50	26	70	4,61E-05	0,15619515	3R:13300036	CG8774	synonymous_variant	4,335956673	CG8774
X3R_9125758_SNP	32	50	26	70	4,61E-05	0,15619515	3R:13300036	CG32473	upstream_gene_variant	4,335956673
X3R_9125758_SNP	32	50	26	70	4,61E-05	0,15619515	3R:13300036	CG43208	upstream_gene_variant	4,335956673
X3R_9125758_SNP	32	50	26	70	4,61E-05	0,15619515	3R:13300036	CG8773	downstream_gene_variant	4,335956673
X3R_9097957_SNP	47	29	52	37	4,63E-05	0,15619515	3R:13272235	CG8449	upstream_gene_variant	4,334762735
X3R_9097957_SNP	47	29	52	37	4,63E-05	0,15619515	3R:13272235	Su(var)3-7	downstream_gene_variant	4,334762735
X3R_9106637_SNP	67	16	65	33	4,63E-05	0,15619515	3R:13280915	CG15888	downstream_gene_variant	4,334055592
X3R_9106637_SNP	67	16	65	33	4,63E-05	0,15619515	3R:13280915	CG8630	intron_variant	4,334055592	CG8630
X3R_8867779_SNP	71	13	74	23	4,64E-05	0,15619515	3R:13042057	CG11668	downstream_gene_variant	4,333507666
X3R_8867779_SNP	71	13	74	23	4,64E-05	0,15619515	3R:13042057	CG11670	5_prime_UTR_variant	4,333507666	CG11670
X3R_8867779_SNP	71	13	74	23	4,64E-05	0,15619515	3R:13042057	CG45122	upstream_gene_variant	4,333507666
X3R_8867779_SNP	71	13	74	23	4,64E-05	0,15619515	3R:13042057	Hsc70-2	upstream_gene_variant	4,333507666
X3R_8867779_SNP	71	13	74	23	4,64E-05	0,15619515	3R:13042057	ry	downstream_gene_variant	4,333507666
X3R_8867779_SNP	71	13	74	23	4,64E-05	0,15619515	3R:13042057	snk	intron_variant	4,333507666	snk
X3R_8867779_SNP	71	13	74	23	4,64E-05	0,15619515	3R:13042057	snk	upstream_gene_variant	4,333507666
X3R_13872743_SNP	32	49	30	67	4,65E-05	0,156409083	3R:18047021	htl	synonymous_variant	4,332094589	htl
X2L_20962490_SNP	62	21	65	28	4,68E-05	0,156697527	2L:20962490	CG42238	downstream_gene_variant	4,330116396
X3R_21110989_SNP	20	62	18	75	4,68E-05	0,156697527	3R:25285267	CG11892	downstream_gene_variant	4,32966173
X3R_21110989_SNP	20	62	18	75	4,68E-05	0,156697527	3R:25285267	CG11893	upstream_gene_variant	4,32966173
X3R_21110989_SNP	20	62	18	75	4,68E-05	0,156697527	3R:25285267	CG13658	upstream_gene_variant	4,32966173
X3R_21110989_SNP	20	62	18	75	4,68E-05	0,156697527	3R:25285267	CG31104	upstream_gene_variant	4,32966173
X3R_21110989_SNP	20	62	18	75	4,68E-05	0,156697527	3R:25285267	CG31300	downstream_gene_variant	4,32966173
X3R_9405671_SNP	56	24	67	29	4,73E-05	0,156973906	3R:13579949	CR43848	downstream_gene_variant	4,325261269
X_4298753_SNP	71	19	81	20	4,73E-05	0,156973906	X:4404720	CR32773	intron_variant,non_coding_transcript_variant	4,324850466	CR32773
X3R_9196004_SNP	46	37	63	35	4,74E-05	0,156973906	3R:13370282	CG34309	upstream_gene_variant	4,324355999
X3R_9196004_SNP	46	37	63	35	4,74E-05	0,156973906	3R:13370282	CG9813	downstream_gene_variant	4,324355999
X3R_9196004_SNP	46	37	63	35	4,74E-05	0,156973906	3R:13370282	CheA87a	3_prime_UTR_variant	4,324355999	CheA87a
X3R_9196004_SNP	46	37	63	35	4,74E-05	0,156973906	3R:13370282	Dic1	downstream_gene_variant	4,324355999
X3R_9196004_SNP	46	37	63	35	4,74E-05	0,156973906	3R:13370282	Lip3	3_prime_UTR_variant	4,324355999	Lip3
X3R_9196004_SNP	46	37	63	35	4,74E-05	0,156973906	3R:13370282	poly	upstream_gene_variant	4,324355999
X3L_15446341_SNP	31	53	38	56	4,75E-05	0,156973906	3L:15453241	CR45394	upstream_gene_variant	4,323590649
X3L_15446341_SNP	31	53	38	56	4,75E-05	0,156973906	3L:15453241	CR45395	upstream_gene_variant	4,323590649
X3R_14346903_SNP	31	44	36	51	4,75E-05	0,156973906	3R:18521181	fru	intron_variant	4,323548383	fru
X3R_9015389_SNP	63	17	82	16	4,75E-05	0,156973906	3R:13189667	CG14380	downstream_gene_variant	4,323031272
X3R_9015389_SNP	63	17	82	16	4,75E-05	0,156973906	3R:13189667	CG8141	upstream_gene_variant	4,323031272
X3R_9015389_SNP	63	17	82	16	4,75E-05	0,156973906	3R:13189667	CG8508	upstream_gene_variant	4,323031272
X2R_17161123_SNP	13	74	12	88	4,76E-05	0,156973906	2R:21273618	Rgk3	intron_variant	4,322691043	Rgk3
X_4777322_SNP	60	28	74	27	4,76E-05	0,156973906	X:4883289	CG42594	intron_variant	4,322426351	CG42594
X2R_16415181_SNP	83	7	94	7	4,79E-05	0,15730602	2R:20527676	CG30151	downstream_gene_variant	4,319944284
X2R_16415181_SNP	83	7	94	7	4,79E-05	0,15730602	2R:20527676	CR44650	downstream_gene_variant	4,319944284
X2R_16415181_SNP	83	7	94	7	4,79E-05	0,15730602	2R:20527676	CR44651	upstream_gene_variant	4,319944284
X2R_16415181_SNP	83	7	94	7	4,79E-05	0,15730602	2R:20527676	GNBP-like3	downstream_gene_variant	4,319944284
X3R_8947917_SNP	57	20	62	26	4,79E-05	0,15730602	3R:13122195	2mit	3_prime_UTR_variant	4,319905909	2mit
X3R_8947917_SNP	57	20	62	26	4,79E-05	0,15730602	3R:13122195	2mit	downstream_gene_variant	4,319905909
X3R_8947917_SNP	57	20	62	26	4,79E-05	0,15730602	3R:13122195	timeout	intron_variant	4,319905909	timeout
X2L_12873189_DEL	51	27	63	30	4,83E-05	0,158311209	2L:12873189	-	intergenic_variant	4,316090546
X2R_14139710_SNP	79	8	86	12	4,85E-05	0,158311209	2R:18252205	CR44421	upstream_gene_variant	4,314373163
X3R_9015400_DEL	18	63	17	79	4,85E-05	0,158311209	3R:13189678	CG14380	downstream_gene_variant	4,314096662
X3R_9015400_DEL	18	63	17	79	4,85E-05	0,158311209	3R:13189678	CG8141	upstream_gene_variant	4,314096662
X3R_9015400_DEL	18	63	17	79	4,85E-05	0,158311209	3R:13189678	CG8508	upstream_gene_variant	4,314096662
X3R_9015505_SNP	61	18	80	17	4,86E-05	0,158311209	3R:13189783	CG14380	downstream_gene_variant	4,31330011
X3R_9015505_SNP	61	18	80	17	4,86E-05	0,158311209	3R:13189783	CG8141	upstream_gene_variant	4,31330011
X3R_9015505_SNP	61	18	80	17	4,86E-05	0,158311209	3R:13189783	CG8508	upstream_gene_variant	4,31330011
X3R_8657205_SNP	15	65	32	64	4,87E-05	0,158311209	3R:12831483	-	intergenic_variant	4,312472822
X3R_9037591_SNP	47	33	58	36	4,87E-05	0,158311209	3R:13211869	CG8483	intron_variant	4,31236707	CG8483
X3R_8930122_SNP	62	24	69	27	4,92E-05	0,159575133	3R:13104400	CR46019	downstream_gene_variant	4,308123177
X3R_8930122_SNP	62	24	69	27	4,92E-05	0,159575133	3R:13104400	timeout	intron_variant	4,308123177	timeout
X2R_14393384_SNP	21	70	33	66	4,94E-05	0,15964295	2R:18505879	GstE11	downstream_gene_variant	4,305947452
X3R_8819964_SNP	21	60	33	62	4,96E-05	0,15964295	3R:12994242	yellow-f2	missense_variant	4,304436988	yellow-f2
X3R_8819964_SNP	21	60	33	62	4,96E-05	0,15964295	3R:12994242	CG17327	downstream_gene_variant	4,304436988
X3R_8819964_SNP	21	60	33	62	4,96E-05	0,15964295	3R:12994242	CG31342	downstream_gene_variant	4,304436988
X3R_8819964_SNP	21	60	33	62	4,96E-05	0,15964295	3R:12994242	CG44194	downstream_gene_variant	4,304436988
X3R_8819964_SNP	21	60	33	62	4,96E-05	0,15964295	3R:12994242	CG7488	upstream_gene_variant	4,304436988
X3R_8819964_SNP	21	60	33	62	4,96E-05	0,15964295	3R:12994242	CG7518	upstream_gene_variant	4,304436988
X3R_8819964_SNP	21	60	33	62	4,96E-05	0,15964295	3R:12994242	yellow-f	upstream_gene_variant	4,304436988
X3R_12944255_SNP	67	21	75	26	4,96E-05	0,15964295	3R:17118533	CG34278	upstream_gene_variant	4,304160178
X3R_12944255_SNP	67	21	75	26	4,96E-05	0,15964295	3R:17118533	CG42779	upstream_gene_variant	4,304160178
X3R_12944255_SNP	67	21	75	26	4,96E-05	0,15964295	3R:17118533	cher	intron_variant	4,304160178	cher
X2R_6323504_SNP	76	13	86	12	4,97E-05	0,15964295	2R:10435999	CG12895	downstream_gene_variant	4,303516662
X2R_6323504_SNP	76	13	86	12	4,97E-05	0,15964295	2R:10435999	Galphao	upstream_gene_variant	4,303516662
X2R_6323504_SNP	76	13	86	12	4,97E-05	0,15964295	2R:10435999	RanBPM	3_prime_UTR_variant	4,303516662	RanBPM
X2R_14139709_SNP	79	8	86	13	4,98E-05	0,15964295	2R:18252204	CR44421	upstream_gene_variant	4,302895644
X3R_8671146_SNP	24	35	43	35	4,98E-05	0,15964295	3R:12845424	beat-Va	intron_variant	4,302683197	beat-Va
X3R_8671146_SNP	24	35	43	35	4,98E-05	0,15964295	3R:12845424	CR44234	downstream_gene_variant	4,302683197
X3R_8671146_SNP	24	35	43	35	4,98E-05	0,15964295	3R:12845424	CR45587	downstream_gene_variant	4,302683197
X3R_9035756_DEL	28	48	34	61	4,99E-05	0,15964295	3R:13210034	CG8483	intron_variant	4,301761703	CG8483
X3R_9158495_SNP	76	10	91	10	4,99E-05	0,15964295	3R:13332773	PK2-R2	5_prime_UTR_variant	4,301667139	PK2-R2
X3R_9070832_SNP	31	51	38	56	5,04E-05	0,161012261	3R:13245110	Ace	intron_variant	4,297180324	Ace
X3R_8655444_SNP	30	50	25	69	5,06E-05	0,161160123	3R:12829722	-	intergenic_variant	4,296005462
X3R_9168808_SNP	52	31	60	35	5,08E-05	0,161648625	3R:13343086	PK2-R1	intron_variant	4,293916204	PK2-R1
X3R_9013242_SNP	44	42	29	61	5,11E-05	0,16186152	3R:13187520	CG14380	upstream_gene_variant	4,291453759
X3R_9013242_SNP	44	42	29	61	5,11E-05	0,16186152	3R:13187520	CG8141	upstream_gene_variant	4,291453759
X3R_9013242_SNP	44	42	29	61	5,11E-05	0,16186152	3R:13187520	CG8508	upstream_gene_variant	4,291453759
X3R_9201805_SNP	31	47	34	60	5,11E-05	0,16186152	3R:13376083	CG34309	downstream_gene_variant	4,291311297
X3R_9201805_SNP	31	47	34	60	5,11E-05	0,16186152	3R:13376083	CG8870	upstream_gene_variant	4,291311297
X3R_9201805_SNP	31	47	34	60	5,11E-05	0,16186152	3R:13376083	CG9813	intron_variant	4,291311297	CG9813
X3R_9201805_SNP	31	47	34	60	5,11E-05	0,16186152	3R:13376083	CR44138	upstream_gene_variant	4,291311297
X3R_9201805_SNP	31	47	34	60	5,11E-05	0,16186152	3R:13376083	Lip3	upstream_gene_variant	4,291311297
X3R_8901252_SNP	55	25	69	23	5,12E-05	0,16186152	3R:13075530	sim	intron_variant	4,290846941	sim
X3R_8679775_SNP	32	49	20	72	5,13E-05	0,16186152	3R:12854053	CG10126	downstream_gene_variant	4,289812629
X3R_8679775_SNP	32	49	20	72	5,13E-05	0,16186152	3R:12854053	CR44234	upstream_gene_variant	4,289812629
X3R_8679775_SNP	32	49	20	72	5,13E-05	0,16186152	3R:12854053	CR45587	upstream_gene_variant	4,289812629
X3R_9113514_SNP	24	59	23	74	5,14E-05	0,16186152	3R:13287792	CG15887	3_prime_UTR_variant	4,2892212	CG15887
X3R_9113514_SNP	24	59	23	74	5,14E-05	0,16186152	3R:13287792	CG15888	upstream_gene_variant	4,2892212
X3R_9113514_SNP	24	59	23	74	5,14E-05	0,16186152	3R:13287792	CG8630	downstream_gene_variant	4,2892212
X3R_9113514_SNP	24	59	23	74	5,14E-05	0,16186152	3R:13287792	Osi22	upstream_gene_variant	4,2892212
X3R_9113514_SNP	24	59	23	74	5,14E-05	0,16186152	3R:13287792	wntD	downstream_gene_variant	4,2892212
X3L_2519166_SNP	38	51	42	60	5,15E-05	0,16186152	3L:2519166	CR45170	downstream_gene_variant	4,287783294
X3L_2519166_SNP	38	51	42	60	5,15E-05	0,16186152	3L:2519166	Spn	intron_variant	4,287783294	Spn
X3R_9137336_SNP	10	77	8	89	5,16E-05	0,16186152	3R:13311614	CG32473	synonymous_variant	4,287608764	CG32473
X3R_9137336_SNP	10	77	8	89	5,16E-05	0,16186152	3R:13311614	CG44142	downstream_gene_variant	4,287608764
X2R_6997996_SNP	35	32	33	32	5,18E-05	0,16186152	2R:11110491	luna	intron_variant	4,286060106	lu
X2R_6997996_SNP	35	32	33	32	5,18E-05	0,16186152	2R:11110491	luna	upstream_gene_variant	4,286060106
X3R_14385342_SNP	33	22	26	31	5,19E-05	0,16186152	3R:18559620	CG43194	downstream_gene_variant	4,285031844
X3R_14385342_SNP	33	22	26	31	5,19E-05	0,16186152	3R:18559620	CG43210	downstream_gene_variant	4,285031844
X3R_14385342_SNP	33	22	26	31	5,19E-05	0,16186152	3R:18559620	CG7691	upstream_gene_variant	4,285031844
X3L_2519050_SNP	54	35	62	38	5,19E-05	0,16186152	3L:2519050	CR45170	downstream_gene_variant	4,28461028
X3L_2519050_SNP	54	35	62	38	5,19E-05	0,16186152	3L:2519050	Spn	intron_variant	4,28461028	Spn
X3R_9258201_SNP	38	47	35	60	5,21E-05	0,16186152	3R:13432479	yrt	synonymous_variant	4,283531459	yrt
X3R_9258201_SNP	38	47	35	60	5,21E-05	0,16186152	3R:13432479	Act87E	downstream_gene_variant	4,283531459
X3R_9025266_SNP	16	66	25	69	5,21E-05	0,16186152	3R:13199544	-	intergenic_variant	4,283417176
X3L_18349479_DEL	30	42	28	55	5,21E-05	0,16186152	3L:18356379	-	intergenic_variant	4,283395575
X3R_9188588_SNP	46	33	62	34	5,25E-05	0,162858896	3R:13362866	Dic1	upstream_gene_variant	4,279971749
X3R_9188588_SNP	46	33	62	34	5,25E-05	0,162858896	3R:13362866	poly	intron_variant	4,279971749	poly
X3R_14056225_SNP	74	13	84	16	5,30E-05	0,164039751	3R:18230503	CG7168	upstream_gene_variant	4,276079496
X3R_14056225_SNP	74	13	84	16	5,30E-05	0,164039751	3R:18230503	Mdh2	downstream_gene_variant	4,276079496
X3R_8056413_SNP	76	11	91	6	5,32E-05	0,164406991	3R:12230691	CG12256	upstream_gene_variant	4,274354986
X3R_8056413_SNP	76	11	91	6	5,32E-05	0,164406991	3R:12230691	CG3916	downstream_gene_variant	4,274354986
X3R_8056413_SNP	76	11	91	6	5,32E-05	0,164406991	3R:12230691	CR43477	downstream_gene_variant	4,274354986
X3R_8056413_SNP	76	11	91	6	5,32E-05	0,164406991	3R:12230691	Cyp313a2	downstream_gene_variant	4,274354986
X3R_8056413_SNP	76	11	91	6	5,32E-05	0,164406991	3R:12230691	Cyp313a5	downstream_gene_variant	4,274354986
X3R_8056413_SNP	76	11	91	6	5,32E-05	0,164406991	3R:12230691	Pglym87	downstream_gene_variant	4,274354986
X3R_14402344_SNP	51	24	60	30	5,40E-05	0,166651929	3R:18576622	CG7694	intron_variant	4,267712897	CG7694
X3R_14402344_SNP	51	24	60	30	5,40E-05	0,166651929	3R:18576622	fray	intron_variant	4,267712897	fray
X3R_10872817_SNP	26	57	31	62	5,43E-05	0,166964922	3R:15047095	-	intergenic_variant	4,265544623
X3R_9069896_SNP	48	32	54	36	5,43E-05	0,166964922	3R:13244174	Ace	intron_variant	4,265397847	Ace
X3R_9031539_SNP	62	17	79	17	5,45E-05	0,167277645	3R:13205817	CG8483	downstream_gene_variant	4,263837044
X3R_9169661_SNP	30	50	31	61	5,48E-05	0,167723733	3R:13343939	PK2-R1	intron_variant	4,261205811	PK2-R1
X3R_9076989_INS	25	36	23	59	5,48E-05	0,167723733	3R:13251267	Ace	intron_variant	4,26087064	Ace
X3R_22480394_SNP	71	14	86	10	5,49E-05	0,167723733	3R:26654672	beat-VII	intron_variant	4,260443714	beat-VII
X3R_22480394_SNP	71	14	86	10	5,49E-05	0,167723733	3R:26654672	Tb	upstream_gene_variant	4,260443714
X2R_8687619_SNP	69	18	85	15	5,51E-05	0,168048101	2R:12800114	sca	synonymous_variant	4,258629733	sca
X2R_8687619_SNP	69	18	85	15	5,51E-05	0,168048101	2R:12800114	CR45137	upstream_gene_variant	4,258629733
X3L_1736371_SNP	64	26	85	18	5,52E-05	0,168048101	3L:1736371	CG18173	missense_variant	4,258119855	CG18173
X3L_1736371_SNP	64	26	85	18	5,52E-05	0,168048101	3L:1736371	Gk	upstream_gene_variant	4,258119855
X3L_1736371_SNP	64	26	85	18	5,52E-05	0,168048101	3L:1736371	Oseg4	upstream_gene_variant	4,258119855
X3R_9048838_SNP	54	27	60	32	5,57E-05	0,169053065	3R:13223116	Ace	3_prime_UTR_variant	4,254145195	Ace
X3R_9048838_SNP	54	27	60	32	5,57E-05	0,169053065	3R:13223116	Ace	downstream_gene_variant	4,254145195
X3R_9048838_SNP	54	27	60	32	5,57E-05	0,169053065	3R:13223116	CG8476	upstream_gene_variant	4,254145195
X3L_2901026_SNP	16	73	16	86	5,57E-05	0,169053065	3L:2901026	Shab	intron_variant	4,254050705	Shab
X2R_15835003_SNP	71	16	77	19	5,61E-05	0,169526097	2R:19947498	CG30447	missense_variant	4,251248686	CG30447
X2R_15835003_SNP	71	16	77	19	5,61E-05	0,169526097	2R:19947498	CG10822	upstream_gene_variant	4,251248686
X2R_15835003_SNP	71	16	77	19	5,61E-05	0,169526097	2R:19947498	CG42690	upstream_gene_variant	4,251248686
X2R_15835003_SNP	71	16	77	19	5,61E-05	0,169526097	2R:19947498	CG42691	upstream_gene_variant	4,251248686
X2R_15835003_SNP	71	16	77	19	5,61E-05	0,169526097	2R:19947498	CG43195	upstream_gene_variant	4,251248686
X3R_8674755_SNP	32	48	22	69	5,61E-05	0,169526097	3R:12849033	beat-Va	upstream_gene_variant	4,251150875
X3R_8674755_SNP	32	48	22	69	5,61E-05	0,169526097	3R:12849033	CR44234	downstream_gene_variant	4,251150875
X3R_8674755_SNP	32	48	22	69	5,61E-05	0,169526097	3R:12849033	CR45587	downstream_gene_variant	4,251150875
X3R_9592011_SNP	24	52	28	65	5,62E-05	0,169526097	3R:13766289	CG9312	synonymous_variant	4,250627036	CG9312
X3R_9592011_SNP	24	52	28	65	5,62E-05	0,169526097	3R:13766289	CG34383	downstream_gene_variant	4,250627036
X3R_9592011_SNP	24	52	28	65	5,62E-05	0,169526097	3R:13766289	Cht5	upstream_gene_variant	4,250627036
X3R_21111105_SNP	64	20	76	18	5,63E-05	0,169627565	3R:25285383	CG11892	downstream_gene_variant	4,249632947
X3R_21111105_SNP	64	20	76	18	5,63E-05	0,169627565	3R:25285383	CG11893	upstream_gene_variant	4,249632947
X3R_21111105_SNP	64	20	76	18	5,63E-05	0,169627565	3R:25285383	CG13658	upstream_gene_variant	4,249632947
X3R_21111105_SNP	64	20	76	18	5,63E-05	0,169627565	3R:25285383	CG31104	upstream_gene_variant	4,249632947
X3R_21111105_SNP	64	20	76	18	5,63E-05	0,169627565	3R:25285383	CG31300	downstream_gene_variant	4,249632947
X2L_2758563_SNP	54	30	55	41	5,66E-05	0,17028132	2L:2758563	CG9960	missense_variant	4,247229379	CG9960
X2L_2758563_SNP	54	30	55	41	5,66E-05	0,17028132	2L:2758563	Bacc	downstream_gene_variant	4,247229379
X2L_2758563_SNP	54	30	55	41	5,66E-05	0,17028132	2L:2758563	CG3077	downstream_gene_variant	4,247229379
X2L_2758563_SNP	54	30	55	41	5,66E-05	0,17028132	2L:2758563	CR44772	upstream_gene_variant	4,247229379
X2L_2758563_SNP	54	30	55	41	5,66E-05	0,17028132	2L:2758563	Snapin	3_prime_UTR_variant	4,247229379	Spin
X2L_2758563_SNP	54	30	55	41	5,66E-05	0,17028132	2L:2758563	Trn-SR	upstream_gene_variant	4,247229379
X2R_18549872_INS	71	15	75	24	5,68E-05	0,170612073	2R:22662367	CG13510	downstream_gene_variant	4,245654876
X2R_18549872_INS	71	15	75	24	5,68E-05	0,170612073	2R:22662367	CG13511	downstream_gene_variant	4,245654876
X2R_18549872_INS	71	15	75	24	5,68E-05	0,170612073	2R:22662367	CG30269	upstream_gene_variant	4,245654876
X2R_18549872_INS	71	15	75	24	5,68E-05	0,170612073	2R:22662367	CG30273	upstream_gene_variant	4,245654876
X2R_18549872_INS	71	15	75	24	5,68E-05	0,170612073	2R:22662367	CG4250	upstream_gene_variant	4,245654876
X2R_18549872_INS	71	15	75	24	5,68E-05	0,170612073	2R:22662367	CG42565	downstream_gene_variant	4,245654876
X2R_18549872_INS	71	15	75	24	5,68E-05	0,170612073	2R:22662367	CG42566	5_prime_UTR_variant	4,245654876	CG42566
X2R_18549872_INS	71	15	75	24	5,68E-05	0,170612073	2R:22662367	CG42566	intron_variant	4,245654876	CG42566
X2R_18549872_INS	71	15	75	24	5,68E-05	0,170612073	2R:22662367	CG42867	upstream_gene_variant	4,245654876
X2R_18549872_INS	71	15	75	24	5,68E-05	0,170612073	2R:22662367	CR42868	upstream_gene_variant	4,245654876
X2R_18549872_INS	71	15	75	24	5,68E-05	0,170612073	2R:22662367	CR45269	downstream_gene_variant	4,245654876
X2R_12853407_SNP	72	16	82	19	5,72E-05	0,171152105	2R:16965902	CR44376	downstream_gene_variant	4,242240743
X2R_12853407_SNP	72	16	82	19	5,72E-05	0,171152105	2R:16965902	CR44377	upstream_gene_variant	4,242240743
X2R_12853407_SNP	72	16	82	19	5,72E-05	0,171152105	2R:16965902	tRNA:G3:53E	upstream_gene_variant	4,242240743
X3R_8992046_DEL	36	44	27	70	5,74E-05	0,171152105	3R:13166324	timeout	downstream_gene_variant	4,241245208
X3R_9447078_SNP	11	73	21	79	5,74E-05	0,171152105	3R:13621356	CG9269	downstream_gene_variant	4,24109976
X3R_9447078_SNP	11	73	21	79	5,74E-05	0,171152105	3R:13621356	CR45680	upstream_gene_variant	4,24109976
X3R_9077555_SNP	58	21	74	22	5,74E-05	0,171152105	3R:13251833	Ace	intron_variant	4,241016462	Ace
X3R_9424983_SNP	59	8	64	14	5,75E-05	0,171152105	3R:13599261	-	intergenic_variant	4,240642012
X2L_3535462_SNP	44	39	48	47	5,77E-05	0,171660746	2L:3535462	Che-13	downstream_gene_variant	4,238628836
X2L_3535462_SNP	44	39	48	47	5,77E-05	0,171660746	2L:3535462	CR44308	upstream_gene_variant	4,238628836
X2L_3535462_SNP	44	39	48	47	5,77E-05	0,171660746	2L:3535462	drm	upstream_gene_variant	4,238628836
X2R_17092896_SNP	45	45	42	54	5,81E-05	0,172559422	2R:21205391	Glycogenin	synonymous_variant	4,235637931	Glycogenin
X2R_17092896_SNP	45	45	42	54	5,81E-05	0,172559422	2R:21205391	CG44245	intron_variant	4,235637931	CG44245
X3R_8991544_SNP	65	17	79	17	5,87E-05	0,173749717	3R:13165822	timeout	downstream_gene_variant	4,231471929
X2R_7073592_SNP	23	59	34	62	5,87E-05	0,173749717	2R:11186087	shn	intron_variant	4,231209663	shn
X3R_9031542_SNP	17	65	13	81	5,89E-05	0,173791902	3R:13205820	CG8483	downstream_gene_variant	4,230105964
X3R_8715261_SNP	56	25	57	37	5,90E-05	0,173791902	3R:12889539	CR33929	downstream_gene_variant	4,22910147
X3R_8715261_SNP	56	25	57	37	5,90E-05	0,173791902	3R:12889539	CR44235	downstream_gene_variant	4,22910147
X3R_8715261_SNP	56	25	57	37	5,90E-05	0,173791902	3R:12889539	d-cup	upstream_gene_variant	4,22910147
X3L_1991711_SNP	40	43	39	50	5,90E-05	0,173791902	3L:1991711	-	intergenic_variant	4,228948921
X3R_14346930_SNP	37	44	42	50	5,91E-05	0,173838361	3R:18521208	fru	intron_variant	4,228116771	fru
X_6841650_SNP	69	18	81	18	5,93E-05	0,173934204	X:6947617	CG14431	intron_variant	4,227162508	CG14431
X_6841650_SNP	69	18	81	18	5,93E-05	0,173934204	X:6947617	CR32733	upstream_gene_variant	4,227162508
X_6841650_SNP	69	18	81	18	5,93E-05	0,173934204	X:6947617	CR4575	upstream_gene_variant	4,227162508
X3R_9321083_SNP	47	35	50	45	5,94E-05	0,17403398	3R:13495361	-	intergenic_variant	4,226199737
X3R_9077002_DEL	24	36	24	59	5,99E-05	0,17493906	3R:13251280	Ace	intron_variant	4,22257006	Ace
X2L_4173414_SNP	27	53	33	65	5,99E-05	0,17493906	2L:4173414	-	intergenic_variant	4,222523081
X2L_6067726_SNP	40	43	49	49	6,00E-05	0,175000642	2L:6067726	CG13993	upstream_gene_variant	4,221660017
X2L_6067726_SNP	40	43	49	49	6,00E-05	0,175000642	2L:6067726	CG13994	downstream_gene_variant	4,221660017
X2L_6067726_SNP	40	43	49	49	6,00E-05	0,175000642	2L:6067726	CG9140	upstream_gene_variant	4,221660017
X2L_6067726_SNP	40	43	49	49	6,00E-05	0,175000642	2L:6067726	CG9147	downstream_gene_variant	4,221660017
X2L_6067726_SNP	40	43	49	49	6,00E-05	0,175000642	2L:6067726	CG9150	3_prime_UTR_variant	4,221660017	CG9150
X2L_6067726_SNP	40	43	49	49	6,00E-05	0,175000642	2L:6067726	CG9154	downstream_gene_variant	4,221660017
X2L_6067726_SNP	40	43	49	49	6,00E-05	0,175000642	2L:6067726	Fbw5	upstream_gene_variant	4,221660017
X2L_6067726_SNP	40	43	49	49	6,00E-05	0,175000642	2L:6067726	Kr-h2	upstream_gene_variant	4,221660017
X3R_11237308_SNP	54	30	54	39	6,05E-05	0,176115854	3R:15411586	Atx2	intron_variant	4,218192154	Atx2
X3R_11237308_SNP	54	30	54	39	6,05E-05	0,176115854	3R:15411586	CG6125	upstream_gene_variant	4,218192154
X_9724826_SNP	27	62	36	65	6,06E-05	0,176222161	X:9830793	CG32698	intron_variant	4,217222187	CG32698
X3L_18497367_SNP	61	26	62	28	6,15E-05	0,178115755	3L:18504267	AstC-R2	upstream_gene_variant	4,211380522
X3R_9168865_SNP	51	31	58	35	6,15E-05	0,178115755	3R:13343143	PK2-R1	intron_variant	4,211168033	PK2-R1
X2R_10840430_SNP	36	41	55	39	6,17E-05	0,178546666	2R:14952925	aPKC	intron_variant	4,209414172	aPKC
X2R_10840430_SNP	36	41	55	39	6,17E-05	0,178546666	2R:14952925	aPKC	upstream_gene_variant	4,209414172
X3R_10013488_SNP	9	79	13	84	6,20E-05	0,179094583	3R:14187766	Dop1R1	intron_variant	4,207380156	Dop1R1
X_978044_SNP	71	17	83	20	6,24E-05	0,179346047	X:1084011	CG3655	intron_variant	4,205155741	CG3655
X_978044_SNP	71	17	83	20	6,24E-05	0,179346047	X:1084011	CG3655	upstream_gene_variant	4,205155741
X_978044_SNP	71	17	83	20	6,24E-05	0,179346047	X:1084011	CR44779	intron_variant,non_coding_transcript_variant	4,205155741	CR44779
X_978044_SNP	71	17	83	20	6,24E-05	0,179346047	X:1084011	CR44779	non_coding_transcript_exon_variant	4,205155741	CR44779
X3R_9057340_SNP	74	10	83	13	6,24E-05	0,179346047	3R:13231618	Ace	intron_variant	4,204720697	Ace
X2L_5764806_SNP	10	76	5	92	6,25E-05	0,179346047	2L:5764806	CG11030	downstream_gene_variant	4,20432766
X2L_5764806_SNP	10	76	5	92	6,25E-05	0,179346047	2L:5764806	CG9171	downstream_gene_variant	4,20432766
X2L_5764806_SNP	10	76	5	92	6,25E-05	0,179346047	2L:5764806	CR31912	upstream_gene_variant	4,20432766
X2L_5764806_SNP	10	76	5	92	6,25E-05	0,179346047	2L:5764806	obst-E	intron_variant	4,20432766	obst-E
X3R_9450733_SNP	9	73	17	81	6,27E-05	0,179346047	3R:13625011	-	intergenic_variant	4,203044959
X3R_9135806_SNP	49	27	58	35	6,27E-05	0,179346047	3R:13310084	CG32473	intron_variant	4,202514812	CG32473
X3R_9135806_SNP	49	27	58	35	6,27E-05	0,179346047	3R:13310084	CG44142	downstream_gene_variant	4,202514812
X3R_9179834_SNP	10	77	11	90	6,28E-05	0,179346047	3R:13354112	mthl12	missense_variant	4,202239915	mthl12
X3R_8980033_SNP	48	36	65	32	6,28E-05	0,179346047	3R:13154311	2mit	intron_variant	4,201879255	2mit
X3R_8980033_SNP	48	36	65	32	6,28E-05	0,179346047	3R:13154311	CR45109	intron_variant,non_coding_transcript_variant	4,201879255	CR45109
X3R_8980033_SNP	48	36	65	32	6,28E-05	0,179346047	3R:13154311	timeout	intron_variant	4,201879255	timeout
X3L_6709179_INS	78	9	84	14	6,30E-05	0,179367748	3L:6716079	ple	intron_variant	4,200490315	ple
X3R_9068417_SNP	38	41	50	40	6,31E-05	0,179367748	3R:13242695	Ace	intron_variant	4,200174139	Ace
X3R_9174777_DEL	22	56	32	59	6,31E-05	0,179367748	3R:13349055	mthl12	upstream_gene_variant	4,199747081
X3R_9174777_DEL	22	56	32	59	6,31E-05	0,179367748	3R:13349055	PK2-R1	downstream_gene_variant	4,199747081
X2L_5764807_SNP	10	76	5	92	6,34E-05	0,17970525	2L:5764807	CG11030	downstream_gene_variant	4,19823967
X2L_5764807_SNP	10	76	5	92	6,34E-05	0,17970525	2L:5764807	CG9171	downstream_gene_variant	4,19823967
X2L_5764807_SNP	10	76	5	92	6,34E-05	0,17970525	2L:5764807	CR31912	upstream_gene_variant	4,19823967
X2L_5764807_SNP	10	76	5	92	6,34E-05	0,17970525	2L:5764807	obst-E	intron_variant	4,19823967	obst-E
X3R_9014023_SNP	8	82	9	92	6,35E-05	0,179738673	3R:13188301	CG14380	upstream_gene_variant	4,197469
X3R_9014023_SNP	8	82	9	92	6,35E-05	0,179738673	3R:13188301	CG8141	upstream_gene_variant	4,197469
X3R_9014023_SNP	8	82	9	92	6,35E-05	0,179738673	3R:13188301	CG8508	upstream_gene_variant	4,197469
X3R_9070253_SNP	65	17	61	36	6,38E-05	0,180277315	3R:13244531	Ace	intron_variant	4,195480641	Ace
X3R_9135808_SNP	48	27	55	35	6,39E-05	0,180315768	3R:13310086	CG32473	intron_variant	4,194700296	CG32473
X3R_9135808_SNP	48	27	55	35	6,39E-05	0,180315768	3R:13310086	CG44142	downstream_gene_variant	4,194700296
X_20219353_SNP	61	28	66	31	6,44E-05	0,181588703	X:20348326	-	intergenic_variant	4,190873112
X2L_15239669_SNP	46	35	59	33	6,45E-05	0,181588703	2L:15239669	ZnT35C	intron_variant	4,190272996	ZnT35C
X3R_9097955_SNP	27	48	37	51	6,47E-05	0,181705523	3R:13272233	CG8449	upstream_gene_variant	4,189309227
X3R_9097955_SNP	27	48	37	51	6,47E-05	0,181705523	3R:13272233	Su(var)3-7	downstream_gene_variant	4,189309227
X3R_9117568_INS	34	44	26	62	6,51E-05	0,182551912	3R:13291846	CG15887	upstream_gene_variant	4,18660758
X3R_9117568_INS	34	44	26	62	6,51E-05	0,182551912	3R:13291846	CG8773	upstream_gene_variant	4,18660758
X3R_9117568_INS	34	44	26	62	6,51E-05	0,182551912	3R:13291846	Osi22	3_prime_UTR_variant	4,18660758	Osi22
X3R_9117568_INS	34	44	26	62	6,51E-05	0,182551912	3R:13291846	wntD	downstream_gene_variant	4,18660758
X3R_8761780_SNP	49	33	46	48	6,53E-05	0,18278469	3R:12936058	beat-Vb	downstream_gene_variant	4,185371831
X3R_8761780_SNP	49	33	46	48	6,53E-05	0,18278469	3R:12936058	CR44236	upstream_gene_variant	4,185371831
X3R_9149279_SNP	10	75	10	91	6,62E-05	0,185009513	3R:13323557	CG45080	upstream_gene_variant	4,179436342
X_19236289_SNP	53	38	60	40	6,63E-05	0,185212588	X:19342256	nAChRalpha7	intron_variant	4,178279723	ChRalpha7
X2R_12884365_SNP	56	30	65	32	6,69E-05	0,186079116	2R:16996860	Cbp53E	downstream_gene_variant	4,174867601
X2R_12884365_SNP	56	30	65	32	6,69E-05	0,186079116	2R:16996860	CG30461	intron_variant	4,174867601	CG30461
X2R_12884365_SNP	56	30	65	32	6,69E-05	0,186079116	2R:16996860	ste24a	downstream_gene_variant	4,174867601
X2R_12884365_SNP	56	30	65	32	6,69E-05	0,186079116	2R:16996860	ste24b	downstream_gene_variant	4,174867601
X2R_12884365_SNP	56	30	65	32	6,69E-05	0,186079116	2R:16996860	ste24c	3_prime_UTR_variant	4,174867601	ste24c
X2R_12884365_SNP	56	30	65	32	6,69E-05	0,186079116	2R:16996860	ste24c	intron_variant	4,174867601	ste24c
X3R_9108703_SNP	67	17	63	33	6,69E-05	0,186079116	3R:13282981	CG8630	synonymous_variant	4,174576998	CG8630
X3R_9108703_SNP	67	17	63	33	6,69E-05	0,186079116	3R:13282981	CG15887	downstream_gene_variant	4,174576998
X3R_9108703_SNP	67	17	63	33	6,69E-05	0,186079116	3R:13282981	CG15888	downstream_gene_variant	4,174576998
X3R_9165991_SNP	77	10	91	12	6,70E-05	0,186079116	3R:13340269	PK2-R1	missense_variant	4,174068733	PK2-R1
X3R_8928451_SNP	66	19	73	23	6,71E-05	0,186079116	3R:13102729	CR46019	downstream_gene_variant	4,173542474
X3R_8928451_SNP	66	19	73	23	6,71E-05	0,186079116	3R:13102729	timeout	intron_variant	4,173542474	timeout
X3R_10852417_SNP	18	67	23	72	6,72E-05	0,186164529	3R:15026695	-	intergenic_variant	4,172668277
X3R_8964282_SNP	63	22	72	22	6,79E-05	0,187529417	3R:13138560	2mit	intron_variant	4,168325478	2mit
X3R_8964282_SNP	63	22	72	22	6,79E-05	0,187529417	3R:13138560	CR45109	intron_variant,non_coding_transcript_variant	4,168325478	CR45109
X3R_8964282_SNP	63	22	72	22	6,79E-05	0,187529417	3R:13138560	timeout	intron_variant	4,168325478	timeout
X3R_9152774_SNP	51	30	51	43	6,79E-05	0,187529417	3R:13327052	PK2-R2	downstream_gene_variant	4,168149159
X2R_13536930_SNP	77	12	90	11	6,80E-05	0,187650856	2R:17649425	CCHa1-R	intron_variant	4,16719625	CCHa1-R
X2L_9922427_SNP	21	64	29	66	6,82E-05	0,187713795	2L:9922427	CG4592	synonymous_variant	4,166379886	CG4592
X2L_9922427_SNP	21	64	29	66	6,82E-05	0,187713795	2L:9922427	CG42366	upstream_gene_variant	4,166379886
X2L_9922427_SNP	21	64	29	66	6,82E-05	0,187713795	2L:9922427	CG4594	downstream_gene_variant	4,166379886
X2L_9922427_SNP	21	64	29	66	6,82E-05	0,187713795	2L:9922427	CG4598	downstream_gene_variant	4,166379886
X2L_9922427_SNP	21	64	29	66	6,82E-05	0,187713795	2L:9922427	CG5885	upstream_gene_variant	4,166379886
X2L_9922427_SNP	21	64	29	66	6,82E-05	0,187713795	2L:9922427	TbCMF46	downstream_gene_variant	4,166379886
X3R_9078266_SNP	17	67	34	63	6,84E-05	0,187840336	3R:13252544	Ace	intron_variant	4,165198962	Ace
X3R_9440237_DEL	13	71	20	78	6,85E-05	0,187840336	3R:13614515	CG9269	upstream_gene_variant	4,164107418
X3R_9440237_DEL	13	71	20	78	6,85E-05	0,187840336	3R:13614515	CG9757	upstream_gene_variant	4,164107418
X3R_9440237_DEL	13	71	20	78	6,85E-05	0,187840336	3R:13614515	CR45680	downstream_gene_variant	4,164107418
X3R_26600119_SNP	19	61	18	77	6,86E-05	0,187840336	3R:30774397	zfh1	synonymous_variant	4,163489925	zfh1
X3R_9076912_SNP	70	10	91	7	6,88E-05	0,187840336	3R:13251190	Ace	intron_variant	4,162415097	Ace
X3R_9019293_SNP	9	81	9	92	6,89E-05	0,187840336	3R:13193571	CG14380	downstream_gene_variant	4,162084134
X3R_9019293_SNP	9	81	9	92	6,89E-05	0,187840336	3R:13193571	CG8141	downstream_gene_variant	4,162084134
X3R_8648859_INS	72	11	61	30	6,90E-05	0,187840336	3R:12823137	-	intergenic_variant	4,160937843
X2L_14143072_INS	77	7	87	7	6,91E-05	0,187840336	2L:14143072	CG17341	intron_variant	4,160336584	CG17341
X2R_18549889_SNP	15	70	24	75	6,91E-05	0,187840336	2R:22662384	CG13510	downstream_gene_variant	4,160229609
X2R_18549889_SNP	15	70	24	75	6,91E-05	0,187840336	2R:22662384	CG13511	downstream_gene_variant	4,160229609
X2R_18549889_SNP	15	70	24	75	6,91E-05	0,187840336	2R:22662384	CG30269	upstream_gene_variant	4,160229609
X2R_18549889_SNP	15	70	24	75	6,91E-05	0,187840336	2R:22662384	CG30273	upstream_gene_variant	4,160229609
X2R_18549889_SNP	15	70	24	75	6,91E-05	0,187840336	2R:22662384	CG4250	upstream_gene_variant	4,160229609
X2R_18549889_SNP	15	70	24	75	6,91E-05	0,187840336	2R:22662384	CG42565	downstream_gene_variant	4,160229609
X2R_18549889_SNP	15	70	24	75	6,91E-05	0,187840336	2R:22662384	CG42566	5_prime_UTR_variant	4,160229609	CG42566
X2R_18549889_SNP	15	70	24	75	6,91E-05	0,187840336	2R:22662384	CG42566	intron_variant	4,160229609	CG42566
X2R_18549889_SNP	15	70	24	75	6,91E-05	0,187840336	2R:22662384	CG42867	upstream_gene_variant	4,160229609
X2R_18549889_SNP	15	70	24	75	6,91E-05	0,187840336	2R:22662384	CR42868	upstream_gene_variant	4,160229609
X2R_18549889_SNP	15	70	24	75	6,91E-05	0,187840336	2R:22662384	CR45269	downstream_gene_variant	4,160229609
X3R_8998394_SNP	28	53	24	71	6,92E-05	0,187840336	3R:13172672	-	intergenic_variant	4,160096854
X3R_9105621_SNP	17	68	32	63	6,95E-05	0,188239619	3R:13279899	CG8630	5_prime_UTR_variant	4,158059564	CG8630
X2R_10841930_SNP	50	31	66	26	6,95E-05	0,188239619	2R:14954425	aPKC	intron_variant	4,15785463	aPKC
X2R_10841930_SNP	50	31	66	26	6,95E-05	0,188239619	2R:14954425	aPKC	upstream_gene_variant	4,15785463
X2R_14383450_SNP	22	63	20	77	6,97E-05	0,188349777	2R:18495945	CG30116	intron_variant	4,156942034	CG30116
X3R_9165308_SNP	24	44	26	59	7,08E-05	0,191050327	3R:13339586	PK2-R1	intron_variant	4,150101836	PK2-R1
X3R_9172181_SNP	27	57	22	74	7,12E-05	0,191924015	3R:13346459	PK2-R1	downstream_gene_variant	4,147463771
X2R_6224869_SNP	14	72	17	80	7,15E-05	0,192384425	2R:10337364	CG42732	intron_variant	4,145767643	CG42732
X3R_9456879_SNP	15	66	21	77	7,19E-05	0,193259384	3R:13631157	CG10841	upstream_gene_variant	4,143142411
X3R_9456879_SNP	15	66	21	77	7,19E-05	0,193259384	3R:13631157	CR45594	non_coding_transcript_exon_variant	4,143142411	CR45594
X3R_9456879_SNP	15	66	21	77	7,19E-05	0,193259384	3R:13631157	sqd	downstream_gene_variant	4,143142411
X3R_8937676_DEL	15	64	18	72	7,21E-05	0,193389235	3R:13111954	timeout	intron_variant	4,142159977	timeout
X3R_26582579_SNP	19	67	18	78	7,22E-05	0,193389235	3R:30756857	-	intergenic_variant	4,141544556
X2R_14383441_SNP	25	60	20	76	7,25E-05	0,193995103	2R:18495936	CG30116	intron_variant	4,139534479	CG30116
X2L_3391964_SNP	81	7	83	17	7,27E-05	0,194096928	2L:3391964	CG42460	upstream_gene_variant	4,138655956
X2L_3391964_SNP	81	7	83	17	7,27E-05	0,194096928	2L:3391964	CR44791	downstream_gene_variant	4,138655956
X2L_3391964_SNP	81	7	83	17	7,27E-05	0,194096928	2L:3391964	CR45301	upstream_gene_variant	4,138655956
X2L_3391964_SNP	81	7	83	17	7,27E-05	0,194096928	2L:3391964	Sfp23F	upstream_gene_variant	4,138655956
X3R_9187647_SNP	22	58	33	64	7,30E-05	0,194679285	3R:13361925	Dic1	upstream_gene_variant	4,136705221
X3R_9187647_SNP	22	58	33	64	7,30E-05	0,194679285	3R:13361925	poly	3_prime_UTR_variant	4,136705221	poly
X3R_9451679_SNP	11	71	16	79	7,34E-05	0,195472637	3R:13625957	CR45594	downstream_gene_variant	4,134106008
X3R_9443609_SNP	63	17	68	26	7,35E-05	0,195472637	3R:13617887	CG9269	downstream_gene_variant	4,133642589
X3R_9443609_SNP	63	17	68	26	7,35E-05	0,195472637	3R:13617887	CR45680	non_coding_transcript_exon_variant	4,133642589	CR45680
X_8934813_SNP	45	40	59	37	7,38E-05	0,195607432	X:9040780	CG42388	intron_variant	4,132007904	CG42388
X_8934813_SNP	45	40	59	37	7,38E-05	0,195607432	X:9040780	CG42388	upstream_gene_variant	4,132007904
X_8934813_SNP	45	40	59	37	7,38E-05	0,195607432	X:9040780	CR43836	intron_variant,non_coding_transcript_variant	4,132007904	CR43836
X2L_1609719_SNP	12	74	18	83	7,39E-05	0,195607432	2L:1609719	CG14352	upstream_gene_variant	4,131351565
X2L_1609719_SNP	12	74	18	83	7,39E-05	0,195607432	2L:1609719	CG31935	intron_variant	4,131351565	CG31935
X2L_1609719_SNP	12	74	18	83	7,39E-05	0,195607432	2L:1609719	haf	downstream_gene_variant	4,131351565
X2L_1609719_SNP	12	74	18	83	7,39E-05	0,195607432	2L:1609719	RFeSP	downstream_gene_variant	4,131351565
X2R_16415175_SNP	7	84	8	95	7,39E-05	0,195607432	2R:20527670	CG30151	downstream_gene_variant	4,131223942
X2R_16415175_SNP	7	84	8	95	7,39E-05	0,195607432	2R:20527670	CR44650	downstream_gene_variant	4,131223942
X2R_16415175_SNP	7	84	8	95	7,39E-05	0,195607432	2R:20527670	CR44651	upstream_gene_variant	4,131223942
X2R_16415175_SNP	7	84	8	95	7,39E-05	0,195607432	2R:20527670	GNBP-like3	downstream_gene_variant	4,131223942
X3R_8704240_SNP	37	49	52	37	7,41E-05	0,195607432	3R:12878518	-	intergenic_variant	4,129950113
X2R_10811283_SNP	40	43	33	61	7,45E-05	0,195607432	2R:14923778	CG10249	intron_variant	4,127944122	CG10249
X2R_8902183_SNP	41	45	45	50	7,47E-05	0,195607432	2R:13014678	-	intergenic_variant	4,126949128
X2R_12569028_SNP	71	19	77	21	7,47E-05	0,195607432	2R:16681523	CG30463	intron_variant	4,126402921	CG30463
X2R_12879250_SNP	59	14	64	23	7,48E-05	0,195607432	2R:16991745	Cbp53E	intron_variant	4,12614375	Cbp53E
X2R_12879250_SNP	59	14	64	23	7,48E-05	0,195607432	2R:16991745	CG30461	downstream_gene_variant	4,12614375
X2R_12879250_SNP	59	14	64	23	7,48E-05	0,195607432	2R:16991745	ste24c	downstream_gene_variant	4,12614375
X2R_1368460_DEL	73	16	85	10	7,48E-05	0,195607432	2R:5480955	CG30440	intron_variant	4,125865177	CG30440
X3R_13175631_SNP	43	40	50	41	7,49E-05	0,195607432	3R:17349909	beat-IIa	intron_variant	4,125773616	beat-IIa
X3R_13175631_SNP	43	40	50	41	7,49E-05	0,195607432	3R:17349909	beat-IIa	upstream_gene_variant	4,125773616
X3R_8998391_SNP	28	53	22	71	7,49E-05	0,195607432	3R:13172669	-	intergenic_variant	4,125693211
X3R_9454674_SNP	13	70	19	80	7,49E-05	0,195607432	3R:13628952	CG10841	upstream_gene_variant	4,125384783
X3R_9454674_SNP	13	70	19	80	7,49E-05	0,195607432	3R:13628952	CR45594	downstream_gene_variant	4,125384783
X2R_16415150_INS	84	7	95	7	7,51E-05	0,195607432	2R:20527645	CG30151	downstream_gene_variant	4,124375157
X2R_16415150_INS	84	7	95	7	7,51E-05	0,195607432	2R:20527645	CR44650	downstream_gene_variant	4,124375157
X2R_16415150_INS	84	7	95	7	7,51E-05	0,195607432	2R:20527645	CR44651	upstream_gene_variant	4,124375157
X2R_16415150_INS	84	7	95	7	7,51E-05	0,195607432	2R:20527645	GNBP-like3	downstream_gene_variant	4,124375157
X2R_16415156_INS	84	7	95	7	7,51E-05	0,195607432	2R:20527651	CG30151	downstream_gene_variant	4,124375157
X2R_16415156_INS	84	7	95	7	7,51E-05	0,195607432	2R:20527651	CR44650	downstream_gene_variant	4,124375157
X2R_16415156_INS	84	7	95	7	7,51E-05	0,195607432	2R:20527651	CR44651	upstream_gene_variant	4,124375157
X2R_16415156_INS	84	7	95	7	7,51E-05	0,195607432	2R:20527651	GNBP-like3	downstream_gene_variant	4,124375157
X3R_8894537_SNP	29	42	30	64	7,53E-05	0,195729751	3R:13068815	sim	intron_variant	4,123470122	sim
X3R_8894537_SNP	29	42	30	64	7,53E-05	0,195729751	3R:13068815	sim	upstream_gene_variant	4,123470122
X3R_9094317_DEL	27	55	33	56	7,56E-05	0,196276899	3R:13268595	Su(var)3-7	inframe_insertion	4,121605812	Su(var)3-7
X3R_9094317_DEL	27	55	33	56	7,56E-05	0,196276899	3R:13268595	CG8449	downstream_gene_variant	4,121605812
X3R_9094317_DEL	27	55	33	56	7,56E-05	0,196276899	3R:13268595	Ravus	upstream_gene_variant	4,121605812
X3R_9333525_SNP	16	66	26	71	7,57E-05	0,196276899	3R:13507803	-	intergenic_variant	4,120993456
X3R_9160298_SNP	27	55	33	64	7,69E-05	0,199053938	3R:13334576	PK2-R1	upstream_gene_variant	4,114261085
X3R_9160298_SNP	27	55	33	64	7,69E-05	0,199053938	3R:13334576	PK2-R2	upstream_gene_variant	4,114261085
X2R_15263516_SNP	51	28	52	41	7,71E-05	0,199257824	2R:19376011	CG10062	intron_variant	4,113186607	CG10062
X2R_15263516_SNP	51	28	52	41	7,71E-05	0,199257824	2R:19376011	CG10062	upstream_gene_variant	4,113186607
X2R_15263516_SNP	51	28	52	41	7,71E-05	0,199257824	2R:19376011	CG10073	upstream_gene_variant	4,113186607
X2R_15263516_SNP	51	28	52	41	7,71E-05	0,199257824	2R:19376011	CG9416	upstream_gene_variant	4,113186607
X2L_4172646_SNP	46	34	67	28	7,76E-05	0,200020908	2L:4172646	-	intergenic_variant	4,110340306
X3R_9102454_SNP	51	26	61	31	7,76E-05	0,200020908	3R:13276732	CG8449	upstream_gene_variant	4,110033188
X3R_9102454_SNP	51	26	61	31	7,76E-05	0,200020908	3R:13276732	CG8630	upstream_gene_variant	4,110033188
X3R_9891529_SNP	76	10	89	10	7,77E-05	0,200020908	3R:14065807	foxo	intron_variant	4,109336302	foxo
X2R_20257701_SNP	60	28	74	23	7,78E-05	0,200020908	2R:24370178	bs	intron_variant	4,109016216	bs
X2R_20257701_SNP	60	28	74	23	7,78E-05	0,200020908	2R:24370178	CR44811	upstream_gene_variant	4,109016216
X2R_20257701_SNP	60	28	74	23	7,78E-05	0,200020908	2R:24370178	tRNA:N5:60C	upstream_gene_variant	4,109016216
X3R_9363468_SNP	7	82	5	93	7,82E-05	0,200723164	3R:13537746	-	intergenic_variant	4,106868783
X2R_16075281_SNP	71	14	81	18	7,86E-05	0,201403714	2R:20187776	-	intergenic_variant	4,104736006
X3R_9445903_SNP	66	14	70	23	7,87E-05	0,201403714	3R:13620181	CG9269	downstream_gene_variant	4,104150828
X3R_9445903_SNP	66	14	70	23	7,87E-05	0,201403714	3R:13620181	CR45680	upstream_gene_variant	4,104150828
X3R_21123500_SNP	29	55	25	71	8,06E-05	0,206114493	3R:25297778	CG13659	upstream_gene_variant	4,093487128
X3R_21123500_SNP	29	55	25	71	8,06E-05	0,206114493	3R:25297778	CG31097	5_prime_UTR_variant	4,093487128	CG31097
X3R_21123500_SNP	29	55	25	71	8,06E-05	0,206114493	3R:25297778	CG31098	upstream_gene_variant	4,093487128
X3R_21123500_SNP	29	55	25	71	8,06E-05	0,206114493	3R:25297778	CG31102	upstream_gene_variant	4,093487128
X3R_21123500_SNP	29	55	25	71	8,06E-05	0,206114493	3R:25297778	CG31288	downstream_gene_variant	4,093487128
X3R_21123500_SNP	29	55	25	71	8,06E-05	0,206114493	3R:25297778	CG31370	upstream_gene_variant	4,093487128
X_8360330_SNP	14	17	25	22	8,10E-05	0,206468055	X:8466297	CG33223	missense_variant	4,09138348	CG33223
X_8360330_SNP	14	17	25	22	8,10E-05	0,206468055	X:8466297	CG12116	downstream_gene_variant	4,09138348
X_8360330_SNP	14	17	25	22	8,10E-05	0,206468055	X:8466297	Cp7Fa	upstream_gene_variant	4,09138348
X_8360330_SNP	14	17	25	22	8,10E-05	0,206468055	X:8466297	Es2	downstream_gene_variant	4,09138348
X_8360330_SNP	14	17	25	22	8,10E-05	0,206468055	X:8466297	Sptr	upstream_gene_variant	4,09138348
X3R_8978787_SNP	66	18	67	28	8,11E-05	0,206468055	3R:13153065	2mit	intron_variant	4,091047535	2mit
X3R_8978787_SNP	66	18	67	28	8,11E-05	0,206468055	3R:13153065	CR45109	intron_variant,non_coding_transcript_variant	4,091047535	CR45109
X3R_8978787_SNP	66	18	67	28	8,11E-05	0,206468055	3R:13153065	timeout	intron_variant	4,091047535	timeout
X_6107590_SNP	45	44	58	43	8,11E-05	0,206468055	X:6213557	Btd	downstream_gene_variant	4,090880196
X3R_9162911_SNP	16	69	15	82	8,14E-05	0,206715732	3R:13337189	PK2-R1	upstream_gene_variant	4,089248207
X3R_9162911_SNP	16	69	15	82	8,14E-05	0,206715732	3R:13337189	PK2-R2	upstream_gene_variant	4,089248207
X3L_13924480_SNP	39	47	49	47	8,15E-05	0,206715732	3L:13931380	CG8833	upstream_gene_variant	4,088850278
X3L_13924480_SNP	39	47	49	47	8,15E-05	0,206715732	3L:13931380	Gl	intron_variant	4,088850278	Gl
X3L_13943990_INS	80	7	90	7	8,16E-05	0,206715732	3L:13950890	CG32137	intron_variant	4,088504892	CG32137
X3R_8935138_SNP	65	18	72	21	8,18E-05	0,207052314	3R:13109416	CR46019	upstream_gene_variant	4,087181876
X3R_8935138_SNP	65	18	72	21	8,18E-05	0,207052314	3R:13109416	timeout	intron_variant	4,087181876	timeout
X2L_1609720_SNP	72	12	83	17	8,21E-05	0,207124875	2L:1609720	CG14352	upstream_gene_variant	4,085597178
X2L_1609720_SNP	72	12	83	17	8,21E-05	0,207124875	2L:1609720	CG31935	intron_variant	4,085597178	CG31935
X2L_1609720_SNP	72	12	83	17	8,21E-05	0,207124875	2L:1609720	haf	downstream_gene_variant	4,085597178
X2L_1609720_SNP	72	12	83	17	8,21E-05	0,207124875	2L:1609720	RFeSP	downstream_gene_variant	4,085597178
X3R_14402402_DEL	52	22	60	28	8,22E-05	0,207124875	3R:18576680	CG7694	intron_variant	4,085268109	CG7694
X3R_14402402_DEL	52	22	60	28	8,22E-05	0,207124875	3R:18576680	fray	intron_variant	4,085268109	fray
X3L_11839943_SNP	41	45	55	44	8,22E-05	0,207124875	3L:11846843	CG12521	downstream_gene_variant	4,085185564
X3L_11839943_SNP	41	45	55	44	8,22E-05	0,207124875	3L:11846843	CG44837	downstream_gene_variant	4,085185564
X3R_9324688_SNP	78	11	74	24	8,23E-05	0,207186716	3R:13498966	-	intergenic_variant	4,08444294
X3R_9114332_SNP	54	29	74	21	8,26E-05	0,207270507	3R:13288610	CG15887	missense_variant	4,082831554	CG15887
X3R_9114332_SNP	54	29	74	21	8,26E-05	0,207270507	3R:13288610	CG15888	upstream_gene_variant	4,082831554
X3R_9114332_SNP	54	29	74	21	8,26E-05	0,207270507	3R:13288610	CG8630	downstream_gene_variant	4,082831554
X3R_9114332_SNP	54	29	74	21	8,26E-05	0,207270507	3R:13288610	Osi22	upstream_gene_variant	4,082831554
X3R_9114332_SNP	54	29	74	21	8,26E-05	0,207270507	3R:13288610	wntD	downstream_gene_variant	4,082831554
X3R_9441131_SNP	69	14	75	23	8,27E-05	0,207270507	3R:13615409	CG9269	upstream_gene_variant	4,082531042
X3R_9441131_SNP	69	14	75	23	8,27E-05	0,207270507	3R:13615409	CG9757	upstream_gene_variant	4,082531042
X3R_9441131_SNP	69	14	75	23	8,27E-05	0,207270507	3R:13615409	CR45680	downstream_gene_variant	4,082531042
X3R_13030519_SNP	19	53	19	64	8,27E-05	0,207270507	3R:17204797	Mur89F	upstream_gene_variant	4,082433578
X3R_13868583_SNP	32	49	26	64	8,34E-05	0,208815085	3R:18042861	htl	downstream_gene_variant	4,078599681
X2L_4437031_SNP	25	45	26	55	8,40E-05	0,209856277	2L:4437031	CG15431	intron_variant	4,075830904	CG15431
X2L_4437031_SNP	25	45	26	55	8,40E-05	0,209856277	2L:4437031	CG34177	downstream_gene_variant	4,075830904
X2L_4437031_SNP	25	45	26	55	8,40E-05	0,209856277	2L:4437031	CG34178	downstream_gene_variant	4,075830904
X2L_4437031_SNP	25	45	26	55	8,40E-05	0,209856277	2L:4437031	CG43056	upstream_gene_variant	4,075830904
X2L_4437031_SNP	25	45	26	55	8,40E-05	0,209856277	2L:4437031	Sfp24F	downstream_gene_variant	4,075830904
X3L_15445950_SNP	35	51	40	57	8,42E-05	0,210113738	3L:15452850	CR45395	upstream_gene_variant	4,074690591
X3L_11047935_SNP	10	69	13	81	8,44E-05	0,210388495	3L:11054835	CG43693	upstream_gene_variant	4,073516071
X3L_11047935_SNP	10	69	13	81	8,44E-05	0,210388495	3L:11054835	CG6321	downstream_gene_variant	4,073516071
X3L_11047935_SNP	10	69	13	81	8,44E-05	0,210388495	3L:11054835	CG7888	intron_variant	4,073516071	CG7888
X3L_11047935_SNP	10	69	13	81	8,44E-05	0,210388495	3L:11054835	CG7888	upstream_gene_variant	4,073516071
X3L_11047935_SNP	10	69	13	81	8,44E-05	0,210388495	3L:11054835	CR45119	downstream_gene_variant	4,073516071
X3R_9051309_SNP	80	7	91	8	8,50E-05	0,211069666	3R:13225587	Ace	3_prime_UTR_variant	4,070402182	Ace
X3R_9051309_SNP	80	7	91	8	8,50E-05	0,211069666	3R:13225587	Ace	downstream_gene_variant	4,070402182
X3R_9051309_SNP	80	7	91	8	8,50E-05	0,211069666	3R:13225587	Ace	intron_variant	4,070402182	Ace
X3R_8979318_SNP	19	66	26	70	8,51E-05	0,211069666	3R:13153596	2mit	intron_variant	4,069913489	2mit
X3R_8979318_SNP	19	66	26	70	8,51E-05	0,211069666	3R:13153596	CR45109	intron_variant,non_coding_transcript_variant	4,069913489	CR45109
X3R_8979318_SNP	19	66	26	70	8,51E-05	0,211069666	3R:13153596	timeout	intron_variant	4,069913489	timeout
X3L_2519148_SNP	49	37	58	40	8,53E-05	0,211069666	3L:2519148	CR45170	downstream_gene_variant	4,068963101
X3L_2519148_SNP	49	37	58	40	8,53E-05	0,211069666	3L:2519148	Spn	intron_variant	4,068963101	Spn
X3L_7771547_SNP	70	18	89	12	8,53E-05	0,211069666	3L:7778447	CG32369	3_prime_UTR_variant	4,068953887	CG32369
X3L_7771547_SNP	70	18	89	12	8,53E-05	0,211069666	3L:7778447	Clk	upstream_gene_variant	4,068953887
X2R_3305932_SNP	57	29	72	26	8,54E-05	0,211069666	2R:7418427	CR44202	downstream_gene_variant	4,068558505
X2R_3305932_SNP	57	29	72	26	8,54E-05	0,211069666	2R:7418427	so	upstream_gene_variant	4,068558505
X3L_11047940_SNP	69	10	80	12	8,54E-05	0,211069666	3L:11054840	CG43693	upstream_gene_variant	4,06846138
X3L_11047940_SNP	69	10	80	12	8,54E-05	0,211069666	3L:11054840	CG6321	downstream_gene_variant	4,06846138
X3L_11047940_SNP	69	10	80	12	8,54E-05	0,211069666	3L:11054840	CG7888	intron_variant	4,06846138	CG7888
X3L_11047940_SNP	69	10	80	12	8,54E-05	0,211069666	3L:11054840	CG7888	upstream_gene_variant	4,06846138
X3L_11047940_SNP	69	10	80	12	8,54E-05	0,211069666	3L:11054840	CR45119	downstream_gene_variant	4,06846138
X3L_2629923_SNP	29	54	27	58	8,55E-05	0,211069666	3L:2629923	CG42245	upstream_gene_variant	4,067886961
X3L_2629923_SNP	29	54	27	58	8,55E-05	0,211069666	3L:2629923	CR45660	non_coding_transcript_exon_variant	4,067886961	CR45660
X3L_2629923_SNP	29	54	27	58	8,55E-05	0,211069666	3L:2629923	CR45982	downstream_gene_variant	4,067886961
X3L_2629923_SNP	29	54	27	58	8,55E-05	0,211069666	3L:2629923	MEP-1	upstream_gene_variant	4,067886961
X3L_2629923_SNP	29	54	27	58	8,55E-05	0,211069666	3L:2629923	Pxn	5_prime_UTR_variant	4,067886961	Pxn
X3L_2629923_SNP	29	54	27	58	8,55E-05	0,211069666	3L:2629923	Pxn	upstream_gene_variant	4,067886961
X3R_14346918_SNP	41	36	46	43	8,62E-05	0,212303998	3R:18521196	fru	intron_variant	4,064274987	fru
X3R_9113710_SNP	55	28	63	31	8,63E-05	0,212303998	3R:13287988	CG15887	3_prime_UTR_variant	4,064154902	CG15887
X3R_9113710_SNP	55	28	63	31	8,63E-05	0,212303998	3R:13287988	CG15888	upstream_gene_variant	4,064154902
X3R_9113710_SNP	55	28	63	31	8,63E-05	0,212303998	3R:13287988	CG8630	downstream_gene_variant	4,064154902
X3R_9113710_SNP	55	28	63	31	8,63E-05	0,212303998	3R:13287988	Osi22	upstream_gene_variant	4,064154902
X3R_9113710_SNP	55	28	63	31	8,63E-05	0,212303998	3R:13287988	wntD	downstream_gene_variant	4,064154902
X2R_20228553_SNP	24	64	30	67	8,64E-05	0,212422138	2R:24341030	bs	upstream_gene_variant	4,063314685
X2R_8899320_INS	75	10	71	25	8,69E-05	0,213313283	2R:13011815	Su(z)2	downstream_gene_variant	4,06089877
X3R_8655716_SNP	66	16	68	28	8,75E-05	0,214461944	3R:12829994	-	intergenic_variant	4,057969464
X2L_5474901_SNP	13	72	18	82	8,78E-05	0,214696614	2L:5474901	-	intergenic_variant	4,056600861
X3R_11061983_SNP	48	33	63	22	8,79E-05	0,214696614	3R:15236261	tefu	synonymous_variant	4,056184828	tefu
X3R_11061983_SNP	48	33	63	22	8,79E-05	0,214696614	3R:15236261	CG34316	downstream_gene_variant	4,056184828
X3R_11061983_SNP	48	33	63	22	8,79E-05	0,214696614	3R:15236261	CR43471	upstream_gene_variant	4,056184828
X3R_14346766_SNP	36	47	42	51	8,80E-05	0,214696614	3R:18521044	fru	intron_variant	4,055708509	fru
X3R_9833415_SNP	45	35	55	41	8,82E-05	0,214716398	3R:14007693	rdx	intron_variant	4,054762312	rdx
X3R_9423628_SNP	13	71	17	76	8,84E-05	0,214716398	3R:13597906	-	intergenic_variant	4,053555792
X3R_9076991_DEL	36	24	59	23	8,84E-05	0,214716398	3R:13251269	Ace	intron_variant	4,053511283	Ace
X3R_9454611_SNP	73	11	82	18	8,85E-05	0,214716398	3R:13628889	CG10841	upstream_gene_variant	4,053298529
X3R_9454611_SNP	73	11	82	18	8,85E-05	0,214716398	3R:13628889	CR45594	downstream_gene_variant	4,053298529
X2L_16372274_SNP	45	33	55	39	8,90E-05	0,215583596	2L:16372274	-	intergenic_variant	4,050588474
X3L_2474173_SNP	30	59	42	56	8,90E-05	0,215583596	3L:2474173	CG16762	downstream_gene_variant	4,050367881
X3L_2474173_SNP	30	59	42	56	8,90E-05	0,215583596	3L:2474173	CG45186	intron_variant	4,050367881	CG45186
X3L_2474173_SNP	30	59	42	56	8,90E-05	0,215583596	3L:2474173	Cyp4d20	downstream_gene_variant	4,050367881
X2L_18515432_SNP	28	54	31	64	8,93E-05	0,215847345	2L:18515432	CG10178	downstream_gene_variant	4,049248007
X2L_18515432_SNP	28	54	31	64	8,93E-05	0,215847345	2L:18515432	CG10211	upstream_gene_variant	4,049248007
X3R_9152149_SNP	68	18	81	18	8,96E-05	0,216076218	3R:13326427	PK2-R2	downstream_gene_variant	4,047897941
X3L_19322960_SNP	12	71	15	84	8,96E-05	0,216076218	3L:19329860	pip	intron_variant	4,047585708	pip
X2R_14143259_SNP	9	68	11	70	9,00E-05	0,216076218	2R:18255754	CR44421	upstream_gene_variant	4,045671991
X3R_9098178_SNP	63	16	58	34	9,01E-05	0,216076218	3R:13272456	CG8449	upstream_gene_variant	4,045453687
X3R_9098178_SNP	63	16	58	34	9,01E-05	0,216076218	3R:13272456	Su(var)3-7	downstream_gene_variant	4,045453687
X2R_19457419_SNP	37	47	37	59	9,01E-05	0,216076218	2R:23569896	apt	intron_variant	4,045261327	apt
X3R_8662924_SNP	34	46	51	46	9,02E-05	0,216076218	3R:12837202	beat-Va	downstream_gene_variant	4,044921459
X2L_11031448_SNP	56	24	62	34	9,02E-05	0,216076218	2L:11031448	CG18666	upstream_gene_variant	4,044687839
X2L_11031448_SNP	56	24	62	34	9,02E-05	0,216076218	2L:11031448	Samuel	intron_variant	4,044687839	Samuel
X3R_9135728_SNP	29	48	41	55	9,05E-05	0,216363385	3R:13310006	CG32473	intron_variant	4,043528486	CG32473
X3R_9135728_SNP	29	48	41	55	9,05E-05	0,216363385	3R:13310006	CG44142	downstream_gene_variant	4,043528486
X2L_12873205_SNP	27	52	30	64	9,06E-05	0,216411958	2L:12873205	-	intergenic_variant	4,042849225
X3R_9180227_SNP	75	10	91	12	9,08E-05	0,216547083	3R:13354505	mthl12	missense_variant	4,041997144	mthl12
X2R_15911957_SNP	56	25	67	31	9,12E-05	0,217091597	2R:20024452	-	intergenic_variant	4,039859945
X3R_9199774_SNP	36	45	35	60	9,13E-05	0,217091597	3R:13374052	CG34309	downstream_gene_variant	4,039746805
X3R_9199774_SNP	36	45	35	60	9,13E-05	0,217091597	3R:13374052	CG9813	intron_variant	4,039746805	CG9813
X3R_9199774_SNP	36	45	35	60	9,13E-05	0,217091597	3R:13374052	CheA87a	downstream_gene_variant	4,039746805
X3R_9199774_SNP	36	45	35	60	9,13E-05	0,217091597	3R:13374052	CR44138	upstream_gene_variant	4,039746805
X3R_9199774_SNP	36	45	35	60	9,13E-05	0,217091597	3R:13374052	Dic1	downstream_gene_variant	4,039746805
X3R_9199774_SNP	36	45	35	60	9,13E-05	0,217091597	3R:13374052	Lip3	upstream_gene_variant	4,039746805
X3R_8992392_SNP	70	15	89	12	9,15E-05	0,217142289	3R:13166670	timeout	downstream_gene_variant	4,03876168
X3R_9098197_SNP	24	58	32	56	9,15E-05	0,217142289	3R:13272475	CG8449	upstream_gene_variant	4,038488829
X3R_9098197_SNP	24	58	32	56	9,15E-05	0,217142289	3R:13272475	Su(var)3-7	downstream_gene_variant	4,038488829
X3R_8171963_SNP	50	29	41	54	9,19E-05	0,217640853	3R:12346241	CG10038	downstream_gene_variant	4,036915686
X3R_8171963_SNP	50	29	41	54	9,19E-05	0,217640853	3R:12346241	CG10041	downstream_gene_variant	4,036915686
X3R_8171963_SNP	50	29	41	54	9,19E-05	0,217640853	3R:12346241	CG44956	downstream_gene_variant	4,036915686
X3R_9034291_SNP	67	15	78	18	9,21E-05	0,217903476	3R:13208569	CG8483	downstream_gene_variant	4,035564
X2R_8437489_SNP	30	56	27	73	9,22E-05	0,217903476	2R:12549984	CG33752	downstream_gene_variant	4,03523997
X2R_8437489_SNP	30	56	27	73	9,22E-05	0,217903476	2R:12549984	fra	intron_variant	4,03523997	fra
X2R_17904322_DEL	19	53	32	54	9,28E-05	0,21870082	2R:22016817	CG34370	intron_variant	4,032475003	CG34370
X2L_16822545_SNP	59	22	78	16	9,28E-05	0,21870082	2L:16822545	Cas	synonymous_variant	4,032331814	Cas
X2L_16822545_SNP	59	22	78	16	9,28E-05	0,21870082	2L:16822545	CG13280	upstream_gene_variant	4,032331814
X2L_16822545_SNP	59	22	78	16	9,28E-05	0,21870082	2L:16822545	CG31739	upstream_gene_variant	4,032331814
X2L_16822545_SNP	59	22	78	16	9,28E-05	0,21870082	2L:16822545	mdy	intron_variant	4,032331814	mdy
X3R_13030794_SNP	72	14	79	16	9,30E-05	0,21870082	3R:17205072	Mur89F	upstream_gene_variant	4,031335059
X3L_1991150_SNP	41	46	46	54	9,32E-05	0,21870082	3L:1991150	-	intergenic_variant	4,030614704
X2L_4301962_SNP	61	22	75	23	9,33E-05	0,21870082	2L:4301962	tutl	intron_variant	4,030042955	tutl
X2R_3305919_SNP	31	56	30	66	9,34E-05	0,21870082	2R:7418414	CR44202	downstream_gene_variant	4,029646568
X2R_3305919_SNP	31	56	30	66	9,34E-05	0,21870082	2R:7418414	so	upstream_gene_variant	4,029646568
X_20447836_SNP	65	23	72	27	9,35E-05	0,21870082	X:20576809	CG42580	downstream_gene_variant	4,029134048
X2L_15230124_SNP	66	21	77	21	9,35E-05	0,21870082	2L:15230124	ZnT35C	missense_variant	4,029025107	ZnT35C
X3R_9833409_SNP	35	47	38	57	9,37E-05	0,21870082	3R:14007687	rdx	intron_variant	4,028035116	rdx
X3R_9196104_SNP	43	38	64	36	9,38E-05	0,21870082	3R:13370382	Lip3	synonymous_variant	4,027939233	Lip3
X3R_9196104_SNP	43	38	64	36	9,38E-05	0,21870082	3R:13370382	CG34309	upstream_gene_variant	4,027939233
X3R_9196104_SNP	43	38	64	36	9,38E-05	0,21870082	3R:13370382	CG9813	downstream_gene_variant	4,027939233
X3R_9196104_SNP	43	38	64	36	9,38E-05	0,21870082	3R:13370382	CheA87a	downstream_gene_variant	4,027939233
X3R_9196104_SNP	43	38	64	36	9,38E-05	0,21870082	3R:13370382	Dic1	downstream_gene_variant	4,027939233
X3R_9196104_SNP	43	38	64	36	9,38E-05	0,21870082	3R:13370382	poly	upstream_gene_variant	4,027939233
X2L_17042180_SNP	78	10	90	9	9,40E-05	0,219045428	2L:17042180	CG15136	downstream_gene_variant	4,026688118
X2L_17042180_SNP	78	10	90	9	9,40E-05	0,219045428	2L:17042180	CR43802	downstream_gene_variant	4,026688118
X3R_9180301_SNP	20	60	18	75	9,46E-05	0,219999335	3R:13354579	mthl12	missense_variant	4,02423435	mthl12
X2R_9593899_SNP	11	78	6	97	9,49E-05	0,220483921	2R:13706394	fas	intron_variant	4,022567058	fas
X3L_5413578_SNP	7	6	14	10	9,50E-05	0,220483921	3L:5420478	CG34391	upstream_gene_variant	4,022147817
X_2753667_INS	71	18	78	18	9,55E-05	0,221319906	X:2859634	kirre	intron_variant	4,019939878	kirre
X2L_15229366_SNP	49	27	57	39	9,62E-05	0,222578865	2L:15229366	ZnT35C	intron_variant	4,016644295	ZnT35C
X2L_14470712_SNP	9	77	9	89	9,63E-05	0,222578865	2L:14470712	-	intergenic_variant	4,016349857
X3R_14385341_SNP	21	33	31	26	9,67E-05	0,222853422	3R:18559619	CG43194	downstream_gene_variant	4,014738562
X3R_14385341_SNP	21	33	31	26	9,67E-05	0,222853422	3R:18559619	CG43210	downstream_gene_variant	4,014738562
X3R_14385341_SNP	21	33	31	26	9,67E-05	0,222853422	3R:18559619	CG7691	upstream_gene_variant	4,014738562
X2R_7322469_SNP	22	57	30	54	9,67E-05	0,222853422	2R:11434964	CG7777	upstream_gene_variant	4,014412458
X2R_7322469_SNP	22	57	30	54	9,67E-05	0,222853422	2R:11434964	CR43771	upstream_gene_variant	4,014412458
X3L_13944832_SNP	9	82	9	90	9,68E-05	0,222853422	3L:13951732	CG32137	intron_variant	4,014130071	CG32137
X2R_10971724_SNP	50	34	62	38	9,71E-05	0,223253605	2R:15084219	-	intergenic_variant	4,012790878
X3R_13676529_SNP	75	12	89	12	9,75E-05	0,223973002	3R:17850807	tinc	intron_variant	4,010834391	tinc
X2R_6997997_SNP	70	14	91	6	9,77E-05	0,224168214	2R:11110492	luna	intron_variant	4,009897451	lu
X2R_6997997_SNP	70	14	91	6	9,77E-05	0,224168214	2R:11110492	luna	upstream_gene_variant	4,009897451
X3R_12944201_SNP	20	65	25	74	9,81E-05	0,224693088	3R:17118479	CG34278	upstream_gene_variant	4,008323909
X3R_12944201_SNP	20	65	25	74	9,81E-05	0,224693088	3R:17118479	CG42779	upstream_gene_variant	4,008323909
X3R_12944201_SNP	20	65	25	74	9,81E-05	0,224693088	3R:17118479	cher	intron_variant	4,008323909	cher
X3R_8949811_SNP	35	42	40	55	9,82E-05	0,224743658	3R:13124089	2mit	3_prime_UTR_variant	4,007669032	2mit
X3R_8949811_SNP	35	42	40	55	9,82E-05	0,224743658	3R:13124089	2mit	downstream_gene_variant	4,007669032
X3R_8949811_SNP	35	42	40	55	9,82E-05	0,224743658	3R:13124089	timeout	intron_variant	4,007669032	timeout
X3R_8627751_SNP	71	12	68	25	9,86E-05	0,22483504	3R:12802029	-	intergenic_variant	4,006276437
X3R_13379359_SNP	51	34	73	25	9,87E-05	0,22483504	3R:17553637	-	intergenic_variant	4,005602684
X3R_9018243_SNP	9	80	10	90	9,87E-05	0,22483504	3R:13192521	CG14380	downstream_gene_variant	4,005585175
X3R_9018243_SNP	9	80	10	90	9,87E-05	0,22483504	3R:13192521	CG8141	downstream_gene_variant	4,005585175
X3R_8684237_SNP	22	53	22	69	9,88E-05	0,22483504	3R:12858515	CG10126	intron_variant	4,005179103	CG10126
X3R_8684237_SNP	22	53	22	69	9,88E-05	0,22483504	3R:12858515	CG10126	upstream_gene_variant	4,005179103
X3L_18314108_SNP	24	61	22	74	9,89E-05	0,22483504	3L:18321008	-	intergenic_variant	4,004717429
X2L_14731584_SNP	38	44	38	57	9,91E-05	0,224911942	2L:14731584	CG31835	upstream_gene_variant	4,004016018
X2L_14731584_SNP	38	44	38	57	9,91E-05	0,224911942	2L:14731584	CG42685	upstream_gene_variant	4,004016018
X2L_14731584_SNP	38	44	38	57	9,91E-05	0,224911942	2L:14731584	CR44857	downstream_gene_variant	4,004016018
X_21322901_SNP	69	18	68	26	1,00E-04	0,226688113	X:21451874	CG42343	intron_variant	4,000047601	CG42343
